# Supplementary material for: The Role of Oxidative Stress in Nervous System Aging
Source: PubMed Central journal article supplement (PMC3699525; doi:10.1371/journal.pone.0068011), 2013-07-02
Supplement: pone.0068011.s003.pdf [file pone.0068011.s003.pdf]

| Gene ID   | Symbol       | Description                                                                         | DEG/Set count | DEG Fold-Change |             |            |            |            |             | Literature-Mining (Aging-Cholesterol literature) |            |            |
|-----------|--------------|-------------------------------------------------------------------------------------|---------------|-----------------|-------------|------------|------------|------------|-------------|--------------------------------------------------|------------|------------|
|           |              |                                                                                     |               | 2mWT_2mKO       | 20mWT_20mKO | 2mKO_20mKO | 2mWT_20mWT | 2mWT_30mWT | 20mWT_30mWT |                                                  |            |            |
|           |              |                                                                                     |               | 9               | 230         | 406        | 48         | 1904       | 1157        | #Paper                                           | Enrichment | BH P-value |
| 14125     | Fcεr1a       | Fc receptor, IgE, high affinity I, alpha polypeptide                                | 4             |                 | 3.44        | 2.43       |            | 4.54       | 3.20        |                                                  |            |            |
| 73690     | Glipr1       | GLI pathogenesis-related 1 (glioma)                                                 | 4             |                 | 2.04        | 2.17       |            | 7.33       | 6.33        |                                                  |            |            |
| 217304    | Cd300lb      | CD300 antigen like family member B                                                  | 4             |                 | 1.91        | 2.09       |            | 4.08       | 4.06        |                                                  |            |            |
| 14528     | Gch1         | GTP cyclohydrolase 1                                                                | 4             |                 |             | 1.98       | 1.70       | 2.66       | 1.57        |                                                  |            |            |
| 15442     | Hpse         | heparanase                                                                          | 4             |                 | 1.40        | 1.98       |            | 5.24       | 4.71        |                                                  |            |            |
| 56193     | Plek         | pleckstrin                                                                          | 4             |                 | 1.68        | 1.90       |            | 7.26       | 5.33        |                                                  |            |            |
| 27384     | Akr1c13      | aldo-keto reductase family 1, member C13                                            | 4             |                 | 1.63        | 1.84       |            | 2.12       | 1.69        |                                                  |            |            |
| 23890     | Gpr34        | G protein-coupled receptor 34                                                       | 4             |                 | 1.77        | 1.83       |            | 3.38       | 2.81        |                                                  |            |            |
| 217303    | Cd300a       | CD300A antigen                                                                      | 4             |                 | 1.79        | 1.78       |            | 2.94       | 3.02        |                                                  |            |            |
| 13058     | Cybb         | cytochrome b-245, beta polypeptide                                                  | 4             |                 | 1.64        | 1.76       |            | 5.67       | 4.65        | 2                                                | 4.8        | 0.13       |
| 20321     | Frrs1        | ferric-chelate reductase 1                                                          | 4             |                 | 1.70        | 1.76       |            | 2.48       | 3.16        |                                                  |            |            |
| 18173     | Slc11a1      | solute carrier family 11 (proton-coupled divalent metal ion transporters), member 1 | 4             |                 | 1.54        | 1.71       |            | 3.28       | 2.88        |                                                  |            |            |
| 107321    | Lpxn         | leupaxin                                                                            | 4             |                 | 1.67        | 1.70       |            | 7.15       | 5.81        |                                                  |            |            |
| 11520     | Plin2        | perilipin 2                                                                         | 4             |                 | 1.51        | 1.62       |            | 1.56       | 1.49        |                                                  |            |            |
| 19734     | Rgs16        | regulator of G-protein signaling 16                                                 | 4             |                 | 1.50        | 1.59       |            | 1.94       | 1.66        |                                                  |            |            |
| 15900     | Irf8         | interferon regulatory factor 8                                                      | 4             |                 | 1.52        | 1.58       |            | 3.90       | 3.69        |                                                  |            |            |
| 75345     | Slamf7       | SLAM family member 7                                                                | 4             |                 | 1.65        | 1.54       |            | 3.55       | 4.21        |                                                  |            |            |
| 13057     | Cyba         | cytochrome b-245, alpha polypeptide                                                 | 4             |                 | 1.31        | 1.54       |            | 2.26       | 1.94        | 4                                                | 15.1       | 1.15E-03   |
| 52855     | Lair1        | leukocyte-associated Ig-like receptor 1                                             | 4             |                 | 1.66        | 1.53       |            | 4.14       | 3.32        |                                                  |            |            |
| 13025     | Ctla2b       | cytotoxic T lymphocyte-associated protein 2 beta                                    | 4             |                 | 1.73        | 1.49       |            | 2.09       | 2.23        |                                                  |            |            |
| 100504230 | LOC100504230 | uncharacterized LOC100504230                                                        | 4             |                 | 1.31        | 1.42       |            | 2.81       | 2.71        |                                                  |            |            |
| 13051     | Cx3cr1       | chemokine (C-X3-C) receptor 1                                                       | 4             |                 | 1.38        | 1.41       |            | 2.00       | 1.80        | 1                                                | 8.2        | 0.19       |
| 227620    | Uap111       | UDP-N-actetylglucosamine pyrophosphorylase 1-like 1                                 | 4             |                 | 1.34        | 1.28       |            | 1.40       | 1.25        |                                                  |            |            |
| 208748    | Prrg3        | proline rich Gla (G-carboxyglutamic acid) 3 (transmembrane)                         | 4             |                 |             | -1.29      | -1.30      | -1.73      | -1.33       |                                                  |            |            |
| 235293    | Sc5d         | sterol-C5-desaturase (fungal ERG3, delta-5-desaturase) homolog (S. cerevisiae)      | 4             |                 |             | -1.38      | -1.53      | -2.31      | -1.51       |                                                  |            |            |
| 105785    | Kdelr3       | KDEL (Lys-Asp-Glu-Leu) endoplasmic reticulum protein retention receptor 3           | 4             |                 |             | -1.38      | -1.49      | -2.00      | -1.34       |                                                  |            |            |
| 16835     | Ldlr         | low density lipoprotein receptor                                                    | 4             |                 |             | -1.42      | -1.26      | -1.75      | -1.38       | 97                                               | 48.9       | 1.30E-122  |
| 16948     | Lox          | lysyl oxidase                                                                       | 4             |                 |             | -1.43      | -1.42      | -3.07      | -2.17       |                                                  |            |            |
| 107993    | Bfsp2        | beaded filament structural protein 2, phakinin                                      | 4             |                 | -1.69       | -1.54      |            | -2.69      | -2.15       |                                                  |            |            |
| 74754     | Dhcr24       | 24-dehydrocholesterol reductase                                                     | 4             |                 |             | -1.79      | -1.76      | -2.77      | -1.58       | 5                                                | 246.1      | 5.52E-10   |
| 12970     | Crygs        | crystallin, gamma S                                                                 | 4             | -2.40           | -3.10       | -2.03      |            |            | -2.41       |                                                  |            |            |
| 16840     | Lect1        | leukocyte cell derived chemotaxin 1                                                 | 4             |                 |             | -2.49      | -2.76      | -5.42      | -1.97       | 2                                                | 72.3       | 2.34E-03   |
| 21844     | Tiam1        | T-cell lymphoma invasion and metastasis 1                                           | 4             | -1.40           | -1.33       |            |            | -1.49      | -1.42       |                                                  |            |            |
| 16071     | Igkc         | immunoglobulin kappa constant                                                       | 3             |                 |             | 8.17       | 7.91       | 15.92      |             |                                                  |            |            |
| 12722     | Clca1        | chloride channel calcium activated 1                                                | 3             |                 |             | 4.10       |            | 4.81       | 2.16        |                                                  |            |            |
| 109225    | Ms4a7        | membrane-spanning 4-domains, subfamily A, member 7                                  | 3             |                 | 2.14        | 3.32       | 2.08       |            |             |                                                  |            |            |
| 12483     | Cd22         | CD22 antigen                                                                        | 3             |                 |             | 3.23       |            | 15.95      | 9.71        |                                                  |            |            |
| 12523     | Cd84         | CD84 antigen                                                                        | 3             |                 | 2.75        | 2.99       |            | 8.43       |             |                                                  |            |            |
| 21956     | Tnnt2        | troponin T2, cardiac                                                                | 3             |                 |             | 2.83       |            | -2.40      | -2.65       | 1                                                | 1.1        | 0.66       |
| 100034251 | Gm11428      | predicted gene 11428                                                                | 3             |                 |             | 2.73       |            | 4.62       | 2.65        |                                                  |            |            |
| 11813     | Apoc2        | apolipoprotein C-II                                                                 | 3             |                 | 3.11        | 2.69       |            | 6.78       |             | 5                                                | 62.9       | 3.12E-07   |
| 57266     | Cxcl14       | chemokine (C-X-C motif) ligand 14                                                   | 3             |                 | 2.23        | 2.66       |            | 7.02       |             |                                                  |            |            |
| 64929     | Scel         | sciellin                                                                            | 3             |                 |             | 2.60       | 2.77       |            | -1.84       |                                                  |            |            |
| 12514     | Cd68         | CD68 antigen                                                                        | 3             |                 | 1.97        | 2.59       |            | 5.18       |             | 2                                                | 1.7        | 0.40       |
| 74096     | Hvcn1        | hydrogen voltage-gated channel 1                                                    | 3             |                 |             | 2.38       |            | 3.46       | 2.96        |                                                  |            |            |
| 11303     | Abca1        | ATP-binding cassette, sub-family A (ABC1), member 1                                 | 3             |                 | 1.38        | 2.22       | 1.82       |            |             | 54                                               | 157.4      | 5.86E-95   |
| 11865     | Arntl        | aryl hydrocarbon receptor nuclear translocator-like                                 | 3             |                 |             | 2.13       |            | -1.55      | -2.04       |                                                  |            |            |
| 12931     | Crif1        | cytokine receptor-like factor 1                                                     | 3             |                 |             | 2.07       |            | 4.44       | 2.80        |                                                  |            |            |
| 21923     | Tnc          | tenascin C                                                                          | 3             |                 |             | 2.06       |            | 5.20       | 3.06        |                                                  |            |            |
| 16369     | Irs3         | insulin receptor substrate 3                                                        | 3             |                 |             | 2.01       |            | -1.81      | -1.70       |                                                  |            |            |
| 12223     | Btc          | betacellulin, epidermal growth factor family member                                 | 3             |                 | 1.88        | 1.94       |            | 5.04       |             |                                                  |            |            |
| 13040     | Ctss         | cathepsin S                                                                         | 3             |                 | 1.54        | 1.84       |            |            | 2.02        | 1                                                | 10.1       | 0.17       |
| 16854     | Lgals3       | lectin, galactose binding, soluble 3                                                | 3             |                 | 1.61        | 1.82       |            | 2.54       |             |                                                  |            |            |
| 15559     | Htr2b        | 5-hydroxytryptamine (serotonin) receptor 2B                                         | 3             |                 |             | 1.75       |            | 5.18       | 3.21        | 4                                                | 0.6        | 0.41       |
| 74202     | Fblim1       | filamin binding LIM protein 1                                                       | 3             |                 |             | 1.72       |            | 2.59       | 1.99        |                                                  |            |            |
| 231842    | Amz1         | archaelysin family metalloproteinase 1                                              | 3             |                 |             | 1.69       |            | 3.49       | 3.06        |                                                  |            |            |
| 20787     | Sreb1f       | sterol regulatory element binding transcription factor 1                            | 3             |                 |             | 1.68       |            | 1.41       | 1.49        | 7                                                | 32.7       | 4.57E-08   |
| 16068     | Il18bp       | interleukin 18 binding protein                                                      | 3             |                 |             | 1.68       |            | 3.83       | 3.69        |                                                  |            |            |
| 54635     | Pdgfc        | platelet-derived growth factor, C polypeptide                                       | 3             |                 |             | 1.64       |            | 2.08       | 1.69        |                                                  |            |            |
| 170743    | Tlr7         | toll-like receptor 7                                                                | 3             |                 |             | 1.62       |            | 4.11       | 3.51        |                                                  |            |            |
| 68279     | Mcoln2       | mucoilin 2                                                                          | 3             |                 |             | 1.60       |            | 4.26       | 4.65        |                                                  |            |            |
| 234878    | BC021891     | cDNA sequence BC021891                                                              | 3             |                 |             | 1.57       | 1.68       |            | -1.57       |                                                  |            |            |
| 12506     | Cd48         | CD48 antigen                                                                        | 3             |                 |             | 1.55       |            | 4.15       | 3.75        |                                                  |            |            |
| 14131     | Fcgr3        | Fc receptor, IgG, low affinity III                                                  | 3             |                 |             | 1.54       |            | 2.94       | 2.66        |                                                  |            |            |
| 14130     | Fcgr2b       | Fc receptor, IgG, low affinity IIb                                                  | 3             |                 |             | 1.52       |            | 3.36       | 2.45        |                                                  |            |            |
| 20423     | Shh          | sonic hedgehog                                                                      | 3             |                 |             | 1.52       | 1.54       | 1.63       |             | 2                                                | 3          | 0.22       |
| 12262     | C1qc         | complement component 1, q subcomponent, C chain                                     | 3             |                 | 1.49        | 1.51       |            | 3.52       |             |                                                  |            |            |
| 18573     | Pde1a        | phosphodiesterase 1A, calmodulin-dependent                                          | 3             |                 |             | 1.50       |            | 1.79       | 1.63        |                                                  |            |            |
| 223433    | Fam105a      | family with sequence similarity 105, member A                                       | 3             |                 |             | 1.49       |            | 2.94       | 2.16        |                                                  |            |            |
| 67844     | Rab32        | RAB32, member RAS oncogene family                                                   | 3             |                 |             | 1.48       |            | 2.28       | 1.77        |                                                  |            |            |
| 246746    | Cd300lf      | CD300 antigen like family member F                                                  | 3             |                 |             | 1.45       |            | 2.01       | 1.94        |                                                  |            |            |
| 66102     | Cxcl16       | chemokine (C-X-C motif) ligand 16                                                   | 3             |                 |             | 1.44       |            | 3.05       | 2.57        |                                                  |            |            |

| Gene ID   | Symbol        | Description                                                              | DEG/Set count | 2mWT_2mKO | 20mWT_20mKO | 2mKO_20mKO | 2mWT_20mWT | 2mWT_30mWT | 20mWT_30mWT | Literature-Mining (Aging-Cholesterol literature) |            |            |
|-----------|---------------|--------------------------------------------------------------------------|---------------|-----------|-------------|------------|------------|------------|-------------|--------------------------------------------------|------------|------------|
|           |               |                                                                          |               | 9         | 230         | 406        | 48         | 1904       | 1157        | #Paper                                           | Enrichment | BH P-value |
| 22177     | Tyrobp        | TYRO protein tyrosine kinase binding protein                             | 3             |           |             | 1.44       |            | 2.27       |             |                                                  |            |            |
| 74211     | 1700017B05Rik | RIKEN cDNA 1700017B05 gene                                               | 3             |           |             | 1.42       |            | 1.95       | 2.03        |                                                  |            |            |
| 12362     | Casp1         | caspase 1                                                                | 3             |           |             | 1.42       |            | 2.43       | 2.02        | 1                                                | 1          | 0.67       |
| 11810     | Apobec1       | apolipoprotein B mRNA editing enzyme, catalytic polypeptide 1            | 3             |           |             | 1.41       |            | 2.56       | 2.10        | 1                                                | 15.7       | 0.13       |
| 18414     | Osmr          | oncostatin M receptor                                                    | 3             |           |             | 1.38       |            | 1.82       | 1.44        |                                                  |            |            |
| 16658     | Mafb          | v-maf musculoaponeurotic fibrosarcoma oncogene family, protein B (avian) | 3             |           |             | 1.38       |            | 2.72       | 2.54        |                                                  |            |            |
| 18991     | Pou3f1        | POU domain, class 3, transcription factor 1                              | 3             |           |             | 1.35       |            | 1.56       | 1.35        |                                                  |            |            |
| 70356     | St13          | suppression of tumorigenicity 13                                         | 3             | 1.27      |             | 1.33       |            | 1.24       |             |                                                  |            |            |
| 14860     | Gsta4         | glutathione S-transferase, alpha 4                                       | 3             |           |             | 1.32       |            | -1.34      | -1.50       |                                                  |            |            |
| 21937     | Tnfrsf1a      | tumor necrosis factor receptor superfamily, member 1a                    | 3             |           |             | 1.31       |            | 1.53       | 1.47        | 2                                                | 1.9        | 0.35       |
| 12661     | Ch1           | cell adhesion molecule with homology to L1CAM                            | 3             |           |             | 1.29       |            | 1.57       | 1.23        |                                                  |            |            |
| 11855     | Arhgap5       | Rho GTPase activating protein 5                                          | 3             |           |             | 1.22       |            | -1.20      | -1.31       |                                                  |            |            |
| 270097    | Vat1l         | vesicle amine transport protein 1 homolog-like (T. californica)          | 3             |           |             | -1.13      |            | -1.30      | -1.14       |                                                  |            |            |
| 13199     | Ddn           | dendrin                                                                  | 3             |           |             | -1.14      |            | -1.45      | -1.27       |                                                  |            |            |
| 243548    | Prickle2      | prickle homolog 2 (Drosophila)                                           | 3             |           |             | -1.17      |            | -1.46      | -1.28       |                                                  |            |            |
| 14175     | Fgf4          | fibroblast growth factor 4                                               | 3             |           |             | -1.20      |            | -1.77      | -1.60       |                                                  |            |            |
| 269116    | Nfasc         | neurofascin                                                              | 3             |           |             | -1.20      |            | -1.49      | -1.31       |                                                  |            |            |
| 20741     | Spnb1         | spectrin beta 1                                                          | 3             |           |             | -1.21      |            | -1.58      | -1.36       |                                                  |            |            |
| 12843     | Col1a2        | collagen, type I, alpha 2                                                | 3             |           |             | -1.27      | -1.25      | -1.21      |             | 3                                                | 5.8        | 0.05       |
| 66985     | Rassf7        | Ras association (RalGDS/AF-6) domain family (N-terminal) member 7        | 3             |           |             | -1.28      |            | -1.84      | -1.35       |                                                  |            |            |
| 237930    | Tll6          | tubulin tyrosine ligase-like family, member 6                            | 3             |           |             | -1.30      |            | -1.58      | -1.48       |                                                  |            |            |
| 76574     | Mfsd2a        | major facilitator superfamily domain containing 2A                       | 3             |           |             | -1.32      |            | -1.91      | -1.51       |                                                  |            |            |
| 72978     | Cnih3         | cornichon homolog 3 (Drosophila)                                         | 3             |           |             | -1.35      | -1.63      | -1.68      |             |                                                  |            |            |
| 230899    | Nppa          | natriuretic peptide type A                                               | 3             |           |             | -1.36      |            | -1.68      | -1.42       | 3                                                | 1.3        | 0.56       |
| 231858    | Radil         | Ras association and DIL domains                                          | 3             |           |             | -1.36      |            | -2.68      | -1.93       |                                                  |            |            |
| 74438     | Clvs1         | clavesin 1                                                               | 3             |           | -1.46       | -1.38      |            |            | -1.32       |                                                  |            |            |
| 100689    | Spon2         | spondin 2, extracellular matrix protein                                  | 3             |           |             | -1.41      |            | -2.59      | -1.81       |                                                  |            |            |
| 22402     | Wisp1         | WNT1 inducible signaling pathway protein 1                               | 3             |           |             | -1.41      | -1.49      | -1.61      |             |                                                  |            |            |
| 22431     | Wt1           | Wilms tumor 1 homolog                                                    | 3             |           |             | -1.43      |            | -3.97      | -4.00       |                                                  |            |            |
| 225742    | St8sia5       | ST8 alpha-N-acetyl-neuraminidase alpha-2,8-sialyltransferase 5           | 3             |           |             | -1.45      |            | -2.20      | -1.48       |                                                  |            |            |
| 12960     | Crybb1        | crystallin, beta B1                                                      | 3             |           |             | -1.45      |            | -2.03      | -1.51       |                                                  |            |            |
| 21390     | Tbxa2r        | thromboxane A2 receptor                                                  | 3             |           |             | -1.47      |            | -2.73      | -1.59       |                                                  |            |            |
| 50782     | Rgs11         | regulator of G-protein signaling 11                                      | 3             |           |             | -1.49      |            | -2.19      | -1.58       |                                                  |            |            |
| 72315     | Ccdc74a       | coiled-coil domain containing 74A                                        | 3             |           | -1.39       | -1.49      |            | -1.71      |             |                                                  |            |            |
| 15160     | Serpind1      | serine (or cysteine) peptidase inhibitor, clade D, member 1              | 3             |           |             | -1.52      |            | -2.53      | -1.82       | 1                                                | 5          | 0.26       |
| 320736    | E130203B14Rik | RIKEN cDNA E130203B14 gene                                               | 3             |           |             | -1.54      | -1.51      |            | -1.55       |                                                  |            |            |
| 319767    | Atp10b        | ATPase, class V, type 10B                                                | 3             |           |             | -1.57      | -2.52      | -3.31      |             |                                                  |            |            |
| 14137     | Fdft1         | farnesyl diphosphate farnesyl transferase 1                              | 3             |           |             | -1.58      | -1.39      | -1.86      |             | 9                                                | 94         | 3.78E-14   |
| 407243    | Tmem189       | transmembrane protein 189                                                | 3             |           |             | -1.59      | -1.43      | -1.70      |             |                                                  |            |            |
| 192156    | Mvd           | mevalonate (diphospho) decarboxylase                                     | 3             |           |             | -1.66      | -1.91      | -2.33      |             | 1                                                | 4.4        | 0.28       |
| 66234     | Sc4mol        | sterol-C4-methyl oxidase-like                                            | 3             |           |             | -1.75      |            | -2.07      | -1.53       |                                                  |            |            |
| 15490     | Hsd17b7       | hydroxysteroid (17-beta) dehydrogenase 7                                 | 3             |           |             | -1.77      |            | -2.18      | -1.44       | 1                                                | 5.6        | 0.24       |
| 13121     | Cyp51         | cytochrome P450, family 51                                               | 3             |           |             | -1.79      | -1.67      |            | -1.47       |                                                  |            |            |
| 237558    | Gm239         | predicted gene 239                                                       | 3             |           |             | -1.80      | -1.87      |            | -1.96       |                                                  |            |            |
| 20775     | Sqle          | squalene epoxidase                                                       | 3             |           |             | -1.84      | -1.49      | -2.09      |             | 1                                                | 16.5       | 0.12       |
| 230459    | Cyp2j13       | cytochrome P450, family 2, subfamily j, polypeptide 13                   | 3             |           |             | -2.12      | -2.48      | -4.27      |             |                                                  |            |            |
| 12587     | Mia1          | melanoma inhibitory activity 1                                           | 3             |           |             | -2.15      | -2.30      | -2.87      |             |                                                  |            |            |
| 140709    | Emid2         | EMI domain containing 2                                                  | 3             |           |             | -2.24      | -2.57      | -3.80      |             |                                                  |            |            |
| 215772    | 9130014G24Rik | RIKEN cDNA 9130014G24 gene                                               | 3             |           |             | -2.41      | -1.63      | -1.39      |             |                                                  |            |            |
| 15163     | Hcls1         | hematopoietic cell specific Lyn substrate 1                              | 3             |           | 1.57        |            |            | 3.62       | 3.90        |                                                  |            |            |
| 16414     | Itgb2         | integrin beta 2                                                          | 3             |           | 1.65        |            |            | 4.01       | 3.87        |                                                  |            |            |
| 105855    | Nckap1l       | NCK associated protein 1 like                                            | 3             |           | 1.62        |            |            | 3.68       | 3.84        |                                                  |            |            |
| 80719     | Igsf6         | immunoglobulin superfamily, member 6                                     | 3             |           | 1.65        |            |            | 3.81       | 3.61        |                                                  |            |            |
| 73656     | Ms4a6c        | membrane-spanning 4-domains, subfamily A, member 6C                      | 3             |           | 1.51        |            |            | 3.84       | 3.48        |                                                  |            |            |
| 216445    | Arhgap9       | Rho GTPase activating protein 9                                          | 3             |           | 1.57        |            |            | 2.69       | 3.19        |                                                  |            |            |
| 23880     | Fyb           | FYN binding protein                                                      | 3             |           | 1.71        |            |            | 4.08       | 3.15        |                                                  |            |            |
| 259277    | Klk8          | kallikrein related-peptidase 8                                           | 3             | 1.89      |             |            |            | 3.92       | 3.06        |                                                  |            |            |
| 226652    | Arhgap30      | Rho GTPase activating protein 30                                         | 3             |           | 1.51        |            |            | 2.80       | 2.94        |                                                  |            |            |
| 74191     | P2ry13        | purinergic receptor P2Y, G-protein coupled 13                            | 3             |           | 1.67        |            |            | 3.14       | 2.93        |                                                  |            |            |
| 192187    | Stab1         | stabilin 1                                                               | 3             |           | 1.41        |            |            | 2.43       | 2.48        |                                                  |            |            |
| 63913     | Fam129a       | family with sequence similarity 129, member A                            | 3             |           | 1.38        |            |            | 2.09       | 2.10        |                                                  |            |            |
| 17133     | Maff          | v-maf musculoaponeurotic fibrosarcoma oncogene family, protein F (avian) | 3             |           | 1.70        |            |            | 1.99       | 2.06        | 1                                                | 107.5      | 0.03       |
| 170706    | Tmem37        | transmembrane protein 37                                                 | 3             |           | 1.42        |            |            | 1.70       | 1.96        |                                                  |            |            |
| 17159     | Man2b1        | mannosidase 2, alpha B1                                                  | 3             |           | 1.46        |            |            | 1.54       | 1.79        |                                                  |            |            |
| 59058     | Bhlhe22       | basic helix-loop-helix family, member e22                                | 3             |           | 1.37        |            |            | 1.58       | 1.58        |                                                  |            |            |
| 16494     | Kcna6         | potassium voltage-gated channel, shaker-related, subfamily, member 6     | 3             |           | 1.49        |            |            | 1.33       | 1.31        |                                                  |            |            |
| 20198     | S100a4        | S100 calcium binding protein A4                                          | 3             |           | 1.20        |            |            | 1.19       | 1.28        | 1                                                | 5.6        | 0.24       |
| 12804     | Cnfr          | ciliary neurotrophic factor receptor                                     | 3             |           | -1.31       |            |            | -1.42      | -1.51       |                                                  |            |            |
| 100503650 | Gm11721       | predicted gene 11721                                                     | 3             | -2.13     |             |            |            | -1.59      | -1.65       |                                                  |            |            |
| 12424     | Cck           | cholecystokinin                                                          | 3             |           | -1.51       |            |            | -1.52      | -1.93       | 2                                                | 0.8        | 1.03       |
| 76747     | Dapl1         | death associated protein-like 1                                          | 3             |           | -1.55       |            |            | -2.18      | -2.08       |                                                  |            |            |
| 12655     | Chi3l3        | chitinase 3-like 3                                                       | 2             |           |             | 16.55      |            | 14.45      |             |                                                  |            |            |

| Gene ID | Symbol   | Description                                                                         | DEG/Set count | 2mWT_2mKO | 20mWT_20mKO | 2mKO_20mKO | 2mWT_20mWT | 2mWT_30mWT | 20mWT_30mWT | Literature-Mining (Aging-Cholesterol literature) |            |            |
|---------|----------|-------------------------------------------------------------------------------------|---------------|-----------|-------------|------------|------------|------------|-------------|--------------------------------------------------|------------|------------|
|         |          |                                                                                     |               | 9         | 230         | 406        | 48         | 1904       | 1157        | #Paper                                           | Enrichment | BH P-value |
| 17474   | Clec4d   | C-type lectin domain family 4, member d                                             | 2             |           | 3.88        | 8.63       |            |            |             |                                                  |            |            |
| 17381   | Mmp12    | matrix metalloproteinase 12                                                         | 2             |           | 3.16        | 4.62       |            |            |             |                                                  |            |            |
| 83433   | Trem2    | triggering receptor expressed on myeloid cells 2                                    | 2             |           | 2.07        | 3.11       |            |            |             |                                                  |            |            |
| 16411   | Ilgax    | integrin alpha X                                                                    | 2             |           | 2.08        | 2.77       |            |            |             | 1                                                | 2.1        | 0.45       |
| 171285  | Havcr2   | hepatitis A virus cellular receptor 2                                               | 2             |           | 2.03        | 2.72       |            |            |             |                                                  |            |            |
| 67477   | Abhd15   | abhydrolase domain containing 15                                                    | 2             |           | 2.43        | 2.42       |            |            |             |                                                  |            |            |
| 15483   | Hsd11b1  | hydroxysteroid 11-beta dehydrogenase 1                                              | 2             |           | 3.22        | 2.41       |            |            |             | 2                                                | 8.6        | 0.06       |
| 93695   | Gpnm6    | glycoprotein (transmembrane) nmb                                                    | 2             |           | 2.00        | 2.39       |            |            |             |                                                  |            |            |
| 16197   | Il7r     | interleukin 7 receptor                                                              | 2             |           | 1.73        | 2.31       |            |            |             |                                                  |            |            |
| 56644   | Clec7a   | C-type lectin domain family 7, member a                                             | 2             |           | 1.97        | 2.30       |            |            |             |                                                  |            |            |
| 68774   | Ms4a6d   | membrane-spanning 4-domains, subfamily A, member 6D                                 | 2             |           | 2.08        | 2.28       |            |            |             |                                                  |            |            |
| 279572  | Tlr13    | toll-like receptor 13                                                               | 2             |           | 2.39        | 2.22       |            |            |             |                                                  |            |            |
| 21928   | Tnfrsf25 | tumor necrosis factor, alpha-induced protein 2                                      | 2             |           |             | 2.22       |            | 4.65       |             |                                                  |            |            |
| 71760   | Agxt2l1  | alanine-glyoxylate aminotransferase 2-like 1                                        | 2             |           |             | 2.20       |            |            | -1.89       |                                                  |            |            |
| 12984   | Csf2rb2  | colony stimulating factor 2 receptor, beta 2, low-affinity (granulocyte-macrophage) | 2             |           |             | 2.16       |            | 2.00       |             |                                                  |            |            |
| 383787  | Gm1337   | predicted gene 1337                                                                 | 2             |           | 2.02        | 2.09       |            |            |             |                                                  |            |            |
| 15199   | Hebp1    | heme binding protein 1                                                              | 2             |           |             | 1.99       |            | 2.20       |             |                                                  |            |            |
| 76408   | Abcc3    | ATP-binding cassette, sub-family C (CFTR/MRP), member 3                             | 2             |           | 1.87        | 1.91       |            |            |             |                                                  |            |            |
| 232431  | Gprc5a   | G protein-coupled receptor, family C, group 5, member A                             | 2             |           |             | 1.89       |            |            | -2.01       |                                                  |            |            |
| 70358   | Steap1   | six transmembrane epithelial antigen of the prostate 1                              | 2             |           |             | 1.81       |            |            | -1.92       |                                                  |            |            |
| 69387   | Dnajb13  | DnaJ (Hsp40) related, subfamily B, member 13                                        | 2             |           |             | 1.77       |            | 2.64       |             |                                                  |            |            |
| 12267   | C3ar1    | complement component 3a receptor 1                                                  | 2             |           | 1.85        | 1.75       |            |            |             |                                                  |            |            |
| 214547  | She      | src homology 2 domain-containing transforming protein E                             | 2             |           | 1.38        | 1.74       |            |            |             |                                                  |            |            |
| 20249   | Scd1     | stearoyl-Coenzyme A desaturase 1                                                    | 2             |           | 1.37        | 1.69       |            |            |             | 8                                                | 22.8       | 5.55E-08   |
| 12983   | Csf2rb   | colony stimulating factor 2 receptor, beta, low-affinity (granulocyte-macrophage)   | 2             |           |             | 1.66       |            | 2.63       |             |                                                  |            |            |
| 20660   | Sorl1    | sortilin-related receptor, LDLR class A repeats-containing                          | 2             |           |             | 1.66       |            | 2.31       |             | 1                                                | 41.7       | 0.07       |
| 56069   | Il17b    | interleukin 17B                                                                     | 2             |           |             | 1.64       |            | 1.52       |             |                                                  |            |            |
| 81879   | Tfcpl2l1 | transcription factor CP2-like 1                                                     | 2             |           |             | 1.62       |            | 2.12       |             |                                                  |            |            |
| 17105   | Lyz2     | lysozyme 2                                                                          | 2             |           |             | 1.62       | 1.42       |            |             |                                                  |            |            |
| 140497  | AF251705 | cDNA sequence AF251705                                                              | 2             |           | 1.72        | 1.62       |            |            |             |                                                  |            |            |
| 12522   | Cd83     | CD83 antigen                                                                        | 2             |           |             | 1.59       |            | 2.11       |             |                                                  |            |            |
| 22414   | Wnt2b    | wingless related MMTV integration site 2b                                           | 2             |           |             | 1.54       |            |            | -1.91       |                                                  |            |            |
| 18143   | Npas2    | neuronal PAS domain protein 2                                                       | 2             |           |             | 1.49       |            |            | -1.43       |                                                  |            |            |
| 239691  | AU021092 | expressed sequence AU021092                                                         | 2             |           |             | 1.47       |            |            | -1.77       |                                                  |            |            |
| 11816   | ApoE     | apolipoprotein E                                                                    | 2             |           |             | 1.44       |            |            | 1.61        | 268                                              | 63.1       | 0          |
| 74365   | Lonr3    | LON peptidase N-terminal domain and ring finger 3                                   | 2             |           |             | 1.43       |            | 1.69       |             |                                                  |            |            |
| 68591   | MocoS    | molybdenum cofactor sulfurase                                                       | 2             |           | 1.37        | 1.43       |            |            |             |                                                  |            |            |
| 239133  | Dleu7    | deleted in lymphocytic leukemia, 7                                                  | 2             |           |             | 1.42       |            | -2.76      |             |                                                  |            |            |
| 50528   | Tmprss2  | transmembrane protease, serine 2                                                    | 2             |           |             | 1.42       |            | -1.86      |             |                                                  |            |            |
| 30794   | Pdlim4   | PDZ and LIM domain 4                                                                | 2             |           |             | 1.41       |            | 1.36       |             |                                                  |            |            |
| 381413  | Gpr176   | G protein-coupled receptor 176                                                      | 2             |           |             | 1.39       |            | 1.61       |             |                                                  |            |            |
| 27965   | Sppg21   | spastic paraplegia 21 homolog (human)                                               | 2             |           |             | 1.34       |            | 1.42       |             |                                                  |            |            |
| 227937  | Pkp4     | plakophilin 4                                                                       | 2             |           |             | 1.32       |            |            | -1.34       |                                                  |            |            |
| 21351   | Taldo1   | transaldolase 1                                                                     | 2             |           | 1.33        | 1.28       |            |            |             |                                                  |            |            |
| 20183   | Rxrg     | retinoid X receptor gamma                                                           | 2             |           | 1.35        | 1.28       |            |            |             |                                                  |            |            |
| 20661   | Sort1    | sortilin 1                                                                          | 2             |           | 1.30        | 1.27       |            |            |             | 1                                                | 102.1      | 0.04       |
| 56456   | Actl6a   | actin-like 6A                                                                       | 2             |           | 1.25        | 1.27       |            |            |             |                                                  |            |            |
| 433375  | Creg1    | cellular repressor of E1A-stimulated genes 1                                        | 2             |           | 1.23        | 1.26       |            |            |             |                                                  |            |            |
| 17536   | Meis2    | Meis homeobox 2                                                                     | 2             |           |             | 1.24       |            |            | -1.39       |                                                  |            |            |
| 55983   | Pdzrn3   | PDZ domain containing RING finger 3                                                 | 2             |           |             | 1.23       |            | -1.47      |             |                                                  |            |            |
| 15212   | Hexb     | hexosaminidase B                                                                    | 2             |           |             | 1.22       |            |            | 1.49        |                                                  |            |            |
| 13030   | Ctsb     | cathepsin B                                                                         | 2             |           |             | 1.20       |            |            | 1.45        | 3                                                | 3.5        | 0.12       |
| 59095   | Fxyd6    | FXYD domain-containing ion transport regulator 6                                    | 2             |           |             | 1.13       |            |            | -1.16       |                                                  |            |            |
| 76893   | Lass2    | LAG1 homolog, ceramide synthase 2                                                   | 2             |           |             | -1.15      |            | -1.45      |             |                                                  |            |            |
| 494448  | Cbx6     | chromobox homolog 6                                                                 | 2             |           |             | -1.17      |            | -1.30      |             |                                                  |            |            |
| 17528   | Mpz      | myelin protein zero                                                                 | 2             |           |             | -1.18      |            | -1.25      |             | 1                                                | 9.9        | 0.17       |
| 16525   | Kcnk1    | potassium channel, subfamily K, member 1                                            | 2             |           |             | -1.21      |            | -1.54      |             |                                                  |            |            |
| 216858  | Kctd11   | potassium channel tetramerisation domain containing 11                              | 2             |           |             | -1.22      |            | -1.30      |             |                                                  |            |            |
| 72927   | Hepacam  | hepatocyte cell adhesion molecule                                                   | 2             |           |             | -1.23      |            | -1.56      |             |                                                  |            |            |
| 74559   | Elovl7   | ELOVL family member 7, elongation of long chain fatty acids (yeast)                 | 2             |           |             | -1.24      |            | -1.43      |             |                                                  |            |            |
| 195209  | Gm22     | predicted gene 22                                                                   | 2             |           |             | -1.24      |            |            | 1.54        |                                                  |            |            |
| 12832   | Col5a2   | collagen, type V, alpha 2                                                           | 2             |           |             | -1.28      |            |            | 1.58        |                                                  |            |            |
| 218121  | Mboat1   | membrane bound O-acyltransferase domain containing 1                                | 2             |           |             | -1.29      |            | -1.62      |             |                                                  |            |            |
| 13360   | Dhcr7    | 7-dehydrocholesterol reductase                                                      | 2             |           |             | -1.30      |            | -1.41      |             | 10                                               | 92.2       | 1.32E-15   |
| 67260   | Lass4    | LAG1 homolog, ceramide synthase 4                                                   | 2             |           |             | -1.32      |            | -1.37      |             |                                                  |            |            |
| 22239   | Ugt8a    | UDP galactosyltransferase 8A                                                        | 2             |           |             | -1.37      |            | -1.69      |             |                                                  |            |            |
| 432530  | Adcy1    | adenylate cyclase 1                                                                 | 2             |           |             | -1.39      |            |            | -1.74       |                                                  |            |            |
| 108116  | Slico3a1 | solute carrier organic anion transporter family, member 3a1                         | 2             |           |             | -1.40      |            | -1.58      |             |                                                  |            |            |
| 101497  | Plekha7  | pleckstrin homology domain containing, family G (with RhoGef domain) member 2       | 2             |           |             | -1.40      |            | -1.69      |             |                                                  |            |            |

| Gene ID   | Symbol        | Description                                                                                                                                 | DEG/Set count | 2mWT_2mKO | 20mWT_20mKO | 2mKO_20mKO | 2mWT_20mWT | 2mWT_30mWT | 20mWT_30mWT | Literature-Mining (Aging-Cholesterol literature) |            |            |
|-----------|---------------|---------------------------------------------------------------------------------------------------------------------------------------------|---------------|-----------|-------------|------------|------------|------------|-------------|--------------------------------------------------|------------|------------|
|           |               |                                                                                                                                             |               | 9         | 230         | 406        | 48         | 1904       | 1157        | #Paper                                           | Enrichment | BH P-value |
| 13116     | Cyp46a1       | cytochrome P450, family 46, subfamily a, polypeptide 1                                                                                      | 2             |           |             | -1.40      |            | -1.88      |             | 15                                               | 806.4      | 1.50E-36   |
| 12825     | Col3a1        | collagen, type III, alpha 1                                                                                                                 | 2             |           |             | -1.41      |            | -1.85      |             | 1                                                | 12.1       | 0.15       |
| 215814    | Ccdc28a       | coiled-coil domain containing 28A                                                                                                           | 2             |           | -1.41       | -1.44      |            |            |             |                                                  |            |            |
| 20356     | Sema5a        | sema domain, seven thrombospondin repeats (type 1 and type 1-like), transmembrane domain (TM) and short cytoplasmic domain, (semaphorin) 5A | 2             |           |             | -1.45      |            |            | -1.85       |                                                  |            |            |
| 12818     | Col14a1       | collagen, type XIV, alpha 1                                                                                                                 | 2             |           |             | -1.46      |            | -1.75      |             |                                                  |            |            |
| 207911    | Mchr1         | melanin-concentrating hormone receptor 1                                                                                                    | 2             |           |             | -1.46      |            | -1.72      |             |                                                  |            |            |
| 13603     | Opn3          | opsin 3                                                                                                                                     | 2             |           |             | -1.47      |            | -1.75      |             |                                                  |            |            |
| 52463     | Tet1          | tet oncogene 1                                                                                                                              | 2             |           |             | -1.49      |            | -1.43      |             |                                                  |            |            |
| 22029     | Traf1         | TNF receptor-associated factor 1                                                                                                            | 2             |           |             | -1.54      | -1.63      |            |             |                                                  |            |            |
| 100503043 | LOC100503043  | armadillo repeat containing, X-linked 4                                                                                                     | 2             |           | -1.52       | -1.55      |            |            |             |                                                  |            |            |
| 54371     | Chst2         | carbohydrate sulfotransferase 2                                                                                                             | 2             |           |             | -1.55      | -1.64      |            |             |                                                  |            |            |
| 56066     | Cxcl11        | chemokine (C-X-C motif) ligand 11                                                                                                           | 2             |           |             | -1.55      |            | -1.64      |             |                                                  |            |            |
| 26456     | Sema4g        | sema domain, immunoglobulin domain (Ig), transmembrane domain (TM) and short cytoplasmic domain, (semaphorin) 4G                            | 2             |           |             | -1.57      |            | -1.67      |             |                                                  |            |            |
| 269344    | Ell3          | elongation factor RNA polymerase II-like 3                                                                                                  | 2             |           | -1.83       | -1.63      |            |            |             |                                                  |            |            |
| 56741     | Igdcc4        | immunoglobulin superfamily, DCC subclass, member 4                                                                                          | 2             |           | -1.74       | -1.66      |            |            |             |                                                  |            |            |
| 66355     | Gmpr          | guanosine monophosphate reductase                                                                                                           | 2             |           | -1.80       | -1.66      |            |            |             |                                                  |            |            |
| 170459    | Stard4        | STAR-related lipid transfer (START) domain containing 4                                                                                     | 2             |           |             | -1.69      |            | -2.32      |             | 1                                                | 240.3      | 0.02       |
| 14401     | Gabrb2        | gamma-aminobutyric acid (GABA) A receptor, subunit beta 2                                                                                   | 2             |           | -2.15       | -1.69      |            |            |             |                                                  |            |            |
| 231293    | Cwh43         | cell wall biogenesis 43 C-terminal homolog (S. cerevisiae)                                                                                  | 2             |           |             | -1.76      |            | 1.64       |             |                                                  |            |            |
| 13170     | Dbp           | D site albumin promoter binding protein                                                                                                     | 2             |           |             | -1.88      |            |            | 2.99        | 1                                                | 3.4        | 0.32       |
| 101883    | Tmem149       | transmembrane protein 149                                                                                                                   | 2             |           |             | -2.01      |            | -2.27      |             |                                                  |            |            |
| 74770     | Hhah1         | hedgehog acyltransferase-like                                                                                                               | 2             |           | -2.47       | -2.08      |            |            |             |                                                  |            |            |
| 238988    | Erc2          | ELKS/RAB6-interacting/CAST family member 2                                                                                                  | 2             |           | -2.12       | -2.08      |            |            |             |                                                  |            |            |
| 227394    | Slco4c1       | solute carrier organic anion transporter family, member 4C1                                                                                 | 2             |           |             | -2.10      | -2.92      |            |             |                                                  |            |            |
| 73166     | Tm7sf2        | transmembrane 7 superfamily member 2                                                                                                        | 2             |           |             | -2.10      |            | -1.70      |             |                                                  |            |            |
| 269784    | Cntn4         | contactin 4                                                                                                                                 | 2             |           | -2.33       | -2.19      |            |            |             |                                                  |            |            |
| 230235    | 6430704M03Rik | RIKEN cDNA 6430704M03 gene                                                                                                                  | 2             |           | -2.21       | -2.42      |            |            |             |                                                  |            |            |
| 229599    | Gm129         | predicted gene 129                                                                                                                          | 2             |           |             | -2.48      |            |            | 2.40        |                                                  |            |            |
| 329217    | Gm5101        | predicted gene 5101                                                                                                                         | 2             |           |             | -2.50      | -3.04      |            |             |                                                  |            |            |
| 114644    | Slc13a3       | solute carrier family 13 (sodium-dependent dicarboxylate transporter), member 3                                                             | 2             |           | -2.02       | -2.53      |            |            |             | 1                                                | 157.1      | 0.03       |
| 100503019 | Gm16551       | predicted gene 16551                                                                                                                        | 2             |           | -3.17       | -3.50      |            |            |             |                                                  |            |            |
| 19215     | Ptgd5         | prostaglandin D2 synthase (brain)                                                                                                           | 2             |           | -3.99       | -5.42      |            |            |             |                                                  |            |            |
| 11656     | Alas2         | aminolevulinic acid synthase 2, erythroid                                                                                                   | 2             |           |             |            |            | 29.00      | 24.18       |                                                  |            |            |
| 328563    | Apol11b       | apolipoprotein L 11b                                                                                                                        | 2             |           |             |            |            | 16.87      | 21.75       |                                                  |            |            |
| 56620     | Clec4n        | C-type lectin domain family 4, member n                                                                                                     | 2             |           |             |            |            | 13.93      | 9.41        |                                                  |            |            |
| 57349     | Ppbb          | pro-platelet basic protein                                                                                                                  | 2             |           |             |            |            | 8.77       | 9.08        | 5                                                | 7.8        | 3.18E-03   |
| 433637    | Gm5547        | predicted gene 5547                                                                                                                         | 2             |           |             |            |            | 10.43      | 8.76        |                                                  |            |            |
| 20210     | Saa3          | serum amyloid A 3                                                                                                                           | 2             |           |             |            |            | 12.19      | 8.13        | 1                                                | 15.3       | 0.13       |
| 229499    | Fcrl1         | Fc receptor-like 1                                                                                                                          | 2             |           |             |            |            | 7.79       | 7.71        |                                                  |            |            |
| 16175     | Il1a          | interleukin 1 alpha                                                                                                                         | 2             |           |             |            |            | 9.62       | 7.36        | 6                                                | 1.1        | 0.70       |
| 12502     | Cd3g          | CD3 antigen, gamma polypeptide                                                                                                              | 2             |           |             |            |            | 9.16       | 7.01        |                                                  |            |            |
| 12493     | Cd37          | CD37 antigen                                                                                                                                | 2             |           |             |            |            | 7.34       | 6.69        |                                                  |            |            |
| 622976    | Gm6377        | predicted gene 6377                                                                                                                         | 2             |           |             |            |            | 6.94       | 6.61        |                                                  |            |            |
| 17972     | Ncf4          | neutrophil cytosolic factor 4                                                                                                               | 2             |           |             |            |            | 6.50       | 6.28        |                                                  |            |            |
| 50778     | Rgs1          | regulator of G-protein signaling 1                                                                                                          | 2             |           |             |            |            | 8.07       | 6.25        |                                                  |            |            |
| 17079     | Cd180         | CD180 antigen                                                                                                                               | 2             |           |             |            |            | 6.18       | 5.84        |                                                  |            |            |
| 16019     | Ighm          | immunoglobulin heavy constant mu                                                                                                            | 2             |           |             |            |            | 15.85      | 5.54        |                                                  |            |            |
| 94176     | Dock2         | dedicator of cyto-kinesis 2                                                                                                                 | 2             |           |             |            |            | 5.92       | 5.53        |                                                  |            |            |
| 18140     | Uhrf1         | ubiquitin-like, containing PHD and RING finger domains, 1                                                                                   | 2             |           |             |            |            | 5.44       | 5.52        |                                                  |            |            |
| 433470    | AA467197      | expressed sequence AA467197                                                                                                                 | 2             |           |             |            |            | 5.69       | 5.46        |                                                  |            |            |
| 56760     | Clec1b        | C-type lectin domain family 1, member b                                                                                                     | 2             |           |             |            |            | 6.87       | 5.25        |                                                  |            |            |
| 20209     | Saa2          | serum amyloid A 2                                                                                                                           | 2             |           |             |            |            | 4.14       | 5.18        |                                                  |            |            |
| 13041     | Ctsw          | cathepsin W                                                                                                                                 | 2             |           |             |            |            | 4.91       | 4.93        |                                                  |            |            |
| 17060     | Blink         | B-cell linker                                                                                                                               | 2             |           |             |            |            | 5.68       | 4.87        |                                                  |            |            |
| 21897     | Tlr1          | tolllike receptor 1                                                                                                                         | 2             |           |             |            |            | 4.70       | 4.61        |                                                  |            |            |
| 20307     | Ccl8          | chemokine (C-C motif) ligand 8                                                                                                              | 2             |           |             |            |            | 11.64      | 4.59        |                                                  |            |            |
| 100043636 | Al662270      | expressed sequence Al662270                                                                                                                 | 2             |           |             |            |            | 4.85       | 4.54        |                                                  |            |            |
| 242705    | E2f2          | E2F transcription factor 2                                                                                                                  | 2             |           |             |            |            | 5.56       | 4.49        |                                                  |            |            |
| 12766     | Cxcr3         | chemokine (C-X-C motif) receptor 3                                                                                                          | 2             |           |             |            |            | 4.63       | 4.41        |                                                  |            |            |
| 320148    | B430306N03Rik | RIKEN cDNA B430306N03 gene                                                                                                                  | 2             |           |             |            |            | 5.24       | 4.36        |                                                  |            |            |
| 12487     | Cd28          | CD28 antigen                                                                                                                                | 2             |           |             |            |            | 3.98       | 4.28        | 3                                                | 2.3        | 0.22       |
| 72054     | Cyp4f18       | cytochrome P450, family 4, subfamily f, polypeptide 18                                                                                      | 2             |           |             |            |            | 3.78       | 4.22        |                                                  |            |            |
| 74131     | Sash3         | SAM and SH3 domain containing 3                                                                                                             | 2             |           |             |            |            | 3.81       | 4.15        |                                                  |            |            |
| 21973     | Top2a         | topoisomerase (DNA) II alpha                                                                                                                | 2             |           |             |            |            | 3.81       | 4.03        |                                                  |            |            |
| 14744     | Gpr65         | G-protein coupled receptor 65                                                                                                               | 2             |           |             |            |            | 5.07       | 4.01        |                                                  |            |            |
| 15170     | Ptpn6         | protein tyrosine phosphatase, non-receptor type 6                                                                                           | 2             |           |             |            |            | 4.49       | 4.01        |                                                  |            |            |
| 12183     | Bpgm          | 2,3-bisphosphoglycerate mutase                                                                                                              | 2             |           |             |            |            | 4.32       | 3.98        |                                                  |            |            |
| 15945     | Cxcl10        | chemokine (C-X-C motif) ligand 10                                                                                                           | 2             |           |             |            |            | 5.14       | 3.98        | 2                                                | 2.4        | 0.28       |
| 20302     | Ccl3          | chemokine (C-C motif) ligand 3                                                                                                              | 2             |           |             |            |            | 4.08       | 3.98        | 1                                                | 1.3        | 0.59       |
| 72925     | March1        | membrane-associated ring finger (C3HC4) 1                                                                                                   | 2             |           |             |            |            | 3.85       | 3.98        |                                                  |            |            |

| Gene ID | Symbol        | Description                                                                                     | DEG/Set count | 2mWT_2mKO | 20mWT_20mKO | 2mKO_20mKO | 2mWT_20mWT | 2mWT_30mWT | 20mWT_30mWT | Literature-Mining (Aging-Cholesterol literature) |            |            |
|---------|---------------|-------------------------------------------------------------------------------------------------|---------------|-----------|-------------|------------|------------|------------|-------------|--------------------------------------------------|------------|------------|
|         |               |                                                                                                 |               | 9         | 230         | 406        | 48         | 1904       | 1157        | #Paper                                           | Enrichment | BH P-value |
| 246256  | Fcgr4         | Fc receptor, IgG, low affinity IV                                                               | 2             |           |             |            |            | 3.42       | 3.97        | 2                                                | 1.8        | 0.38       |
| 23845   | Clec5a        | C-type lectin domain family 5, member a                                                         | 2             |           |             |            |            | 4.27       | 3.93        |                                                  |            |            |
| 14017   | Evi2a         | ecotropic viral integration site 2a                                                             | 2             |           |             |            |            | 3.89       | 3.92        |                                                  |            |            |
| 268697  | Ccnb1         | cyclin B1                                                                                       | 2             |           |             |            |            | 3.03       | 3.89        |                                                  |            |            |
| 20491   | Sla           | src-like adaptor                                                                                | 2             |           |             |            |            | 3.91       | 3.89        |                                                  |            |            |
| 16643   | Klr1          | killer cell lectin-like receptor, subfamily D, member 1                                         | 2             |           |             |            |            | 3.97       | 3.87        |                                                  |            |            |
| 278180  | Vsig4         | V-set and immunoglobulin domain containing 4                                                    | 2             |           |             |            |            | 5.01       | 3.84        |                                                  |            |            |
| 209837  | Slc38a5       | solute carrier family 38, member 5                                                              | 2             |           |             |            |            | 3.58       | 3.82        | 1                                                | 9.8        | 0.17       |
| 12501   | Cd3e          | CD3 antigen, epsilon polypeptide                                                                | 2             |           |             |            |            | 3.80       | 3.81        |                                                  |            |            |
| 23900   | Hcst          | hematopoietic cell signal transducer                                                            | 2             |           |             |            |            | 3.94       | 3.77        |                                                  |            |            |
| 56743   | Lat2          | linker for activation of T cells family, member 2                                               | 2             |           |             |            |            | 4.53       | 3.63        |                                                  |            |            |
| 22324   | Vav1          | vav 1 oncogene                                                                                  | 2             |           |             |            |            | 3.57       | 3.62        |                                                  |            |            |
| 20345   | Selplg        | selectin, platelet (p-selectin) ligand                                                          | 2             |           |             |            |            | 3.27       | 3.54        |                                                  |            |            |
| 212032  | Hk3           | hexokinase 3                                                                                    | 2             |           |             |            |            | 3.07       | 3.53        |                                                  |            |            |
| 17476   | Mpeg1         | macrophage expressed gene 1                                                                     | 2             |           | 1.91        |            |            |            | 3.51        |                                                  |            |            |
| 18733   | Lilrb3        | leukocyte immunoglobulin-like receptor, subfamily B (with TM and ITIM domains), member 3        | 2             |           |             |            |            | 3.79       | 3.47        |                                                  |            |            |
| 108101  | Fermt3        | fermitin family homolog 3 (Drosophila)                                                          | 2             |           |             |            |            | 3.10       | 3.46        |                                                  |            |            |
| 67712   | Slc25a37      | solute carrier family 25, member 37                                                             | 2             |           |             |            |            | 3.83       | 3.44        |                                                  |            |            |
| 19264   | Ptpnc         | protein tyrosine phosphatase, receptor type, C                                                  | 2             |           |             |            |            | 4.33       | 3.42        | 5                                                | 3.1        | 0.07       |
| 76459   | Car12         | carbonic anhydrase 12                                                                           | 2             |           |             |            |            | 3.30       | 3.40        |                                                  |            |            |
| 17951   | Naip5         | NLR family, apoptosis inhibitory protein 5                                                      | 2             |           |             |            |            | 3.52       | 3.35        |                                                  |            |            |
| 16182   | Il18r1        | interleukin 18 receptor 1                                                                       | 2             |           |             |            |            | 3.03       | 3.30        |                                                  |            |            |
| 20135   | Rrm2          | ribonucleotide reductase M2                                                                     | 2             |           |             |            |            | 3.19       | 3.30        |                                                  |            |            |
| 12508   | Cd53          | CD53 antigen                                                                                    | 2             |           |             |            |            | 3.60       | 3.29        |                                                  |            |            |
| 20288   | Msr1          | macrophage scavenger receptor 1                                                                 | 2             |           |             |            |            | 3.21       | 3.27        | 2                                                | 15.4       | 0.03       |
| 17969   | Ncf1          | neutrophil cytosolic factor 1                                                                   | 2             |           |             |            |            | 3.28       | 3.24        |                                                  |            |            |
| 17948   | Naip2         | NLR family, apoptosis inhibitory protein 2                                                      | 2             |           |             |            |            | 4.29       | 3.23        |                                                  |            |            |
| 52033   | Pbk           | PDZ binding kinase                                                                              | 2             |           |             |            |            | 2.85       | 3.22        |                                                  |            |            |
| 66610   | Abi3          | ABI gene family, member 3                                                                       | 2             |           |             |            |            | 2.83       | 3.22        |                                                  |            |            |
| 14799   | Gria1         | glutamate receptor, ionotropic, AMPA1 (alpha 1)                                                 | 2             |           |             |            |            | 3.51       | 3.18        | 1                                                | 0.4        | 0.78       |
| 57781   | Cd200r1       | CD200 receptor 1                                                                                | 2             |           |             |            |            | 2.81       | 3.17        |                                                  |            |            |
| 18557   | Cdk18         | cyclin-dependent kinase 18                                                                      | 2             |           |             |            |            | 3.55       | 3.16        |                                                  |            |            |
| 192188  | Stab2         | stabilin 2                                                                                      | 2             |           |             |            |            | 2.81       | 3.13        |                                                  |            |            |
| 380732  | Gm885         | predicted gene 885                                                                              | 2             |           |             |            |            | 2.53       | 3.13        |                                                  |            |            |
| 80891   | Fcrls         | Fc receptor-like S, scavenger receptor                                                          | 2             |           |             |            |            | 3.16       | 3.06        |                                                  |            |            |
| 11629   | Aif1          | allograft inflammatory factor 1                                                                 | 2             |           |             |            |            | 2.78       | 3.01        | 1                                                | 9.5        | 0.17       |
| 69769   | Tnfrsf8l2     | tumor necrosis factor, alpha-induced protein 8-like 2                                           | 2             |           |             |            |            | 3.27       | 2.97        |                                                  |            |            |
| 68662   | Scgb3a1       | secretoglobulin, family 3A, member 1                                                            | 2             |           |             |            |            | 3.80       | 2.96        |                                                  |            |            |
| 12802   | Cnr2          | cannabinoid receptor 2 (macrophage)                                                             | 2             |           |             |            |            | 2.78       | 2.95        |                                                  |            |            |
| 17394   | Mmp8          | matrix metalloproteinase 8                                                                      | 2             |           |             |            |            | 2.93       | 2.93        |                                                  |            |            |
| 20556   | Slnf2         | schlafen 2                                                                                      | 2             |           |             |            |            | 3.47       | 2.91        |                                                  |            |            |
| 80901   | Cxcr6         | chemokine (C-X-C motif) receptor 6                                                              | 2             |           |             |            |            | 3.44       | 2.88        |                                                  |            |            |
| 21990   | Tph1          | tryptophan hydroxylase 1                                                                        | 2             |           | 2.10        |            |            |            | 2.85        |                                                  |            |            |
| 15430   | Hoxd10        | homeobox D10                                                                                    | 2             |           |             |            |            | 3.28       | 2.84        |                                                  |            |            |
| 232201  | Arhgap25      | Rho GTPase activating protein 25                                                                | 2             |           |             |            |            | 3.32       | 2.84        |                                                  |            |            |
| 320207  | Pik3r5        | phosphoinositide-3-kinase, regulatory subunit 5, p101                                           | 2             |           |             |            |            | 2.95       | 2.76        |                                                  |            |            |
| 14281   | Fos           | FBJ osteosarcoma oncogene                                                                       | 2             |           |             |            |            | 3.87       | 2.71        | 11                                               | 1.7        | 0.15       |
| 15902   | Id2           | inhibitor of DNA binding 2                                                                      | 2             |           |             |            |            | 4.63       | 2.71        |                                                  |            |            |
| 21391   | Tbxas1        | thromboxane A synthase 1, platelet                                                              | 2             |           |             |            |            | 2.51       | 2.69        | 23                                               | 4.6        | 4.61E-08   |
| 27052   | Aoaah         | acyloxyacyl hydrolase                                                                           | 2             |           |             |            |            | 3.03       | 2.68        |                                                  |            |            |
| 11846   | Arg1          | arginase, liver                                                                                 | 2             |           |             |            |            | 3.02       | 2.68        | 1                                                | 30.3       | 0.08       |
| 14544   | Gda           | guanine deaminase                                                                               | 2             |           |             |            |            | 3.39       | 2.61        |                                                  |            |            |
| 11799   | Birc5         | baculoviral IAP repeat-containing 5                                                             | 2             |           |             |            |            | 3.30       | 2.61        | 1                                                | 1.1        | 0.63       |
| 223838  | Adamts20      | a disintegrin-like and metalloproteinase (reprolysin type) with thrombospondin type 1 motif, 20 | 2             |           |             |            |            | 3.18       | 2.60        |                                                  |            |            |
| 233406  | Prc1          | protein regulator of cytokinesis 1                                                              | 2             |           |             |            |            | 2.77       | 2.60        |                                                  |            |            |
| 17085   | Ly9           | lymphocyte antigen 9                                                                            | 2             |           |             |            |            | 2.18       | 2.58        |                                                  |            |            |
| 24055   | Sh3bp2        | SH3-domain binding protein 2                                                                    | 2             |           |             |            |            | 2.51       | 2.57        |                                                  |            |            |
| 54445   | Unc93b1       | unc-93 homolog B1 (C. elegans)                                                                  | 2             |           |             |            |            | 2.29       | 2.56        |                                                  |            |            |
| 20375   | Sfp1          | SFFV proviral integration 1                                                                     | 2             |           |             |            |            | 2.57       | 2.55        |                                                  |            |            |
| 23833   | Cd52          | CD52 antigen                                                                                    | 2             |           |             |            |            | 2.43       | 2.54        |                                                  |            |            |
| 217203  | Tmem106a      | transmembrane protein 106A                                                                      | 2             |           |             |            |            | 2.67       | 2.54        |                                                  |            |            |
| 64214   | Rgs18         | regulator of G-protein signaling 18                                                             | 2             |           |             |            |            | 2.51       | 2.53        |                                                  |            |            |
| 20296   | Ccl2          | chemokine (C-C motif) ligand 2                                                                  | 2             |           |             |            |            | 2.37       | 2.52        | 14                                               | 4.6        | 3.61E-05   |
| 16154   | Il10ra        | interleukin 10 receptor, alpha                                                                  | 2             |           |             |            |            | 2.42       | 2.52        |                                                  |            |            |
| 15364   | Hmga2         | high mobility group AT-hook 2                                                                   | 2             |           | 1.74        |            |            |            | 2.51        |                                                  |            |            |
| 13733   | Emr1          | EGF-like module containing, mucin-like, hormone receptor-like sequence 1                        | 2             |           |             |            |            | 2.87       | 2.51        |                                                  |            |            |
| 67749   | 4930583H14Rik | RIKEN cDNA 4930583H14 gene                                                                      | 2             |           |             |            |            | 3.02       | 2.49        |                                                  |            |            |
| 19141   | Lgmn          | legumain                                                                                        | 2             |           |             |            |            | 3.38       | 2.45        |                                                  |            |            |
| 18793   | Plaur         | plasminogen activator, urokinase receptor                                                       | 2             |           |             |            |            | 2.42       | 2.44        |                                                  |            |            |
| 21418   | Tfap2a        | transcription factor AP-2, alpha                                                                | 2             |           |             |            |            | 2.98       | 2.44        | 2                                                | 4          | 0.16       |
| 21826   | Thbs2         | thrombospondin 2                                                                                | 2             |           |             |            |            | 2.02       | 2.44        |                                                  |            |            |
| 12767   | Cxcr4         | chemokine (C-X-C motif) receptor 4                                                              | 2             |           |             |            |            | 2.39       | 2.42        | 4                                                | 3.5        | 0.07       |
| 29873   | Cspg5         | chondroitin sulfate proteoglycan 5                                                              | 2             |           |             |            |            | 2.09       | 2.42        |                                                  |            |            |
| 233571  | P2ry6         | pyrimidinergic receptor P2Y, G-protein coupled, 6                                               | 2             |           |             |            |            | 1.90       | 2.37        |                                                  |            |            |
| 13036   | Ctsh          | cathepsin H                                                                                     | 2             |           |             |            |            | 2.07       | 2.37        |                                                  |            |            |

| Gene ID | Symbol        | Description                                                                              | DEG/Set count | 2mWT_2mKO | 20mWT_20mKO | 2mKO_20mKO | 2mWT_20mWT | 2mWT_30mWT | 20mWT_30mWT | Literature-Mining (Aging-Cholesterol literature) |            |            |
|---------|---------------|------------------------------------------------------------------------------------------|---------------|-----------|-------------|------------|------------|------------|-------------|--------------------------------------------------|------------|------------|
|         |               |                                                                                          |               | 9         | 230         | 406        | 48         | 1904       | 1157        | #Paper                                           | Enrichment | BH P-value |
| 72119   | Tpx2          | TPX2, microtubule-associated protein homolog ( <i>Xenopus laevis</i> )                   | 2             |           |             |            |            | 2.01       | 2.37        |                                                  |            |            |
| 24088   | Tlr2          | toll-like receptor 2                                                                     | 2             |           |             |            |            | 2.76       | 2.33        | 1                                                | 1          | 1.04       |
| 20306   | Ccl7          | chemokine (C-C motif) ligand 7                                                           | 2             |           |             |            |            | 2.39       | 2.32        |                                                  |            |            |
| 239743  | Klhl6         | kelch-like 6 ( <i>Drosophila</i> )                                                       | 2             |           |             |            |            | 2.42       | 2.32        |                                                  |            |            |
| 20305   | Ccl6          | chemokine (C-C motif) ligand 6                                                           | 2             |           |             |            |            | 2.25       | 2.31        |                                                  |            |            |
| 20308   | Ccl9          | chemokine (C-C motif) ligand 9                                                           | 2             |           |             |            |            | 2.11       | 2.31        |                                                  |            |            |
| 14129   | Fcgr1         | Fc receptor, IgG, high affinity I                                                        | 2             |           |             |            |            | 2.38       | 2.31        |                                                  |            |            |
| 12051   | Bcl3          | B-cell leukemia/lymphoma 3                                                               | 2             |           |             |            |            | 2.31       | 2.29        |                                                  |            |            |
| 54486   | Hpgds         | hematopoietic prostaglandin D synthase                                                   | 2             |           |             |            |            | 2.82       | 2.29        |                                                  |            |            |
| 71398   | 5430427O19Rik | RIKEN cDNA 5430427O19 gene                                                               | 2             |           |             |            |            | 3.08       | 2.27        |                                                  |            |            |
| 21803   | Tgfb1         | transforming growth factor, beta 1                                                       | 2             |           |             |            |            | 2.22       | 2.24        | 12                                               | 1.4        | 0.31       |
| 226101  | Myof          | myoferlin                                                                                | 2             |           |             |            |            | 2.18       | 2.23        |                                                  |            |            |
| 18751   | Prkcb         | protein kinase C, beta                                                                   | 2             |           |             |            |            | 3.09       | 2.23        |                                                  |            |            |
| 23948   | Mmp17         | matrix metalloproteinase 17                                                              | 2             |           |             |            |            | 1.94       | 2.20        |                                                  |            |            |
| 76438   | Rftn1         | raftlin lipid raft linker 1                                                              | 2             |           |             |            |            | 1.99       | 2.19        |                                                  |            |            |
| 53945   | Slc40a1       | solute carrier family 40 (iron-regulated transporter), member 1                          | 2             |           |             |            |            | 2.03       | 2.19        |                                                  |            |            |
| 11513   | Adcy7         | adenylate cyclase 7                                                                      | 2             |           |             |            |            | 2.18       | 2.18        | 3                                                | 1.5        | 0.51       |
| 27056   | Irf5          | interferon regulatory factor 5                                                           | 2             |           |             |            |            | 2.10       | 2.17        |                                                  |            |            |
| 228482  | Arhgap11a     | Rho GTPase activating protein 11A                                                        | 2             |           |             |            |            | 2.29       | 2.17        |                                                  |            |            |
| 16331   | Inpp5d        | inositol polyphosphate-5-phosphatase D                                                   | 2             |           |             |            |            | 2.21       | 2.16        |                                                  |            |            |
| 19217   | Ptger2        | prostaglandin E receptor 2 (subtype EP2)                                                 | 2             |           |             |            |            | 2.19       | 2.15        |                                                  |            |            |
| 12986   | Csf3r         | colony stimulating factor 3 receptor (granulocyte)                                       | 2             |           |             |            |            | 2.11       | 2.15        |                                                  |            |            |
| 21816   | Tgm1          | transglutaminase 1, K polypeptide                                                        | 2             |           |             |            |            | 2.31       | 2.14        | 1                                                | 5.4        | 0.24       |
| 404710  | Iqgap3        | IQ motif containing GTPase activating protein 3                                          | 2             |           |             |            |            | 2.63       | 2.12        |                                                  |            |            |
| 72318   | Cyth4         | cytohesin 4                                                                              | 2             |           |             |            |            | 2.33       | 2.12        |                                                  |            |            |
| 18768   | Pkib          | protein kinase inhibitor beta, cAMP dependent, testis specific                           | 2             |           |             |            |            | 2.62       | 2.10        |                                                  |            |            |
| 64136   | Sdf2l1        | stromal cell-derived factor 2-like 1                                                     | 2             |           |             |            |            | 2.82       | 2.09        |                                                  |            |            |
| 74490   | Mamstr        | MEF2 activating motif and SAP domain containing transcriptional regulator                | 2             |           |             |            |            | 1.71       | 2.09        |                                                  |            |            |
| 106869  | Tnfrsf8       | tumor necrosis factor, alpha-induced protein 8                                           | 2             |           |             |            |            | 2.43       | 2.08        |                                                  |            |            |
| 26360   | Angptl2       | angiopoietin-like 2                                                                      | 2             |           |             |            |            | 1.86       | 2.08        |                                                  |            |            |
| 16822   | Lcp2          | lymphocyte cytosolic protein 2                                                           | 2             |           |             |            |            | 2.02       | 2.08        |                                                  |            |            |
| 67220   | Plekho1       | pleckstrin homology domain containing, family O member 1                                 | 2             |           |             |            |            | 1.95       | 2.06        |                                                  |            |            |
| 329679  | Fnip2         | folliculin interacting protein 2                                                         | 2             |           |             |            |            | 2.16       | 2.06        |                                                  |            |            |
| 13024   | Ctla2a        | cytotoxic T lymphocyte-associated protein 2 alpha                                        | 2             |           |             |            |            | 2.01       | 2.04        |                                                  |            |            |
| 20698   | Sphk1         | sphingosine kinase 1                                                                     | 2             |           |             |            |            | 1.88       | 2.04        |                                                  |            |            |
| 50917   | Galns         | galactosamine (N-acetyl)-6-sulfate sulfatase                                             | 2             |           |             |            |            | 1.71       | 2.04        | 1                                                | 2.1        | 0.45       |
| 19296   | Pvt1          | plasmacytoma variant translocation 1                                                     | 2             |           |             |            |            | 2.30       | 2.03        |                                                  |            |            |
| 77209   | 8030453O22Rik | RIKEN cDNA 8030453O22 gene                                                               | 2             |           |             |            |            | 2.48       | 2.03        |                                                  |            |            |
| 213068  | Tmem71        | transmembrane protein 71                                                                 | 2             |           |             |            |            | 2.30       | 2.02        |                                                  |            |            |
| 72042   | Cotl1         | coactosin-like 1 ( <i>Dictyostelium</i> )                                                | 2             |           |             |            |            | 1.72       | 2.01        |                                                  |            |            |
| 11910   | Atf3          | activating transcription factor 3                                                        | 2             |           |             |            |            | 1.46       | 1.98        |                                                  |            |            |
| 211550  | Tifa          | TRAF-interacting protein with forkhead-associated domain                                 | 2             |           |             |            |            | 2.17       | 1.97        |                                                  |            |            |
| 213696  | Duoxa1        | dual oxidase maturation factor 1                                                         | 2             |           |             |            |            | 2.01       | 1.96        |                                                  |            |            |
| 574428  | Zmynd15       | zinc finger, MYND-type containing 15                                                     | 2             |           |             |            |            | 2.14       | 1.96        |                                                  |            |            |
| 20674   | Sox2          | SRY-box containing gene 2                                                                | 2             |           |             |            |            | 2.72       | 1.94        |                                                  |            |            |
| 216991  | Adap2         | ArfGAP with dual PH domains 2                                                            | 2             |           |             |            |            | 1.59       | 1.94        |                                                  |            |            |
| 73112   | 3110003A17Rik | RIKEN cDNA 3110003A17 gene                                                               | 2             |           |             |            |            | 2.05       | 1.94        |                                                  |            |            |
| 108911  | Rcc2          | regulator of chromosome condensation 2                                                   | 2             |           |             |            |            | 2.38       | 1.94        |                                                  |            |            |
| 12971   | Crym          | crystallin, mu                                                                           | 2             |           |             |            |            | 2.08       | 1.93        |                                                  |            |            |
| 17304   | Mfge8         | milk fat globule-EGF factor 8 protein                                                    | 2             |           |             |            |            | 1.76       | 1.93        |                                                  |            |            |
| 20652   | Soat1         | sterol O-acyltransferase 1                                                               | 2             |           |             |            |            | 2.21       | 1.92        | 15                                               | 154        | 1.92E-26   |
| 16913   | Psmb8         | proteasome (prosome, macropain) subunit, beta type 8 (large multifunctional peptidase 7) | 2             |           |             |            |            | 1.97       | 1.91        |                                                  |            |            |
| 94224   | Srd5a2        | steroid 5 alpha-reductase 2                                                              | 2             |           |             |            |            | 2.24       | 1.91        |                                                  |            |            |
| 277360  | Prex1         | phosphatidylinositol-3,4,5-trisphosphate-dependent Rac exchange factor 1                 | 2             |           |             |            |            | 2.18       | 1.90        |                                                  |            |            |
| 14056   | Ezh2          | enhancer of zeste homolog 2 ( <i>Drosophila</i> )                                        | 2             |           | 1.47        |            |            |            | 1.89        |                                                  |            |            |
| 226841  | Vash2         | vasohibin 2                                                                              | 2             |           |             |            |            | 1.81       | 1.88        |                                                  |            |            |
| 80982   | 9930013L23Rik | RIKEN cDNA 9930013L23 gene                                                               | 2             |           |             |            |            | 1.91       | 1.87        |                                                  |            |            |
| 56470   | Rgs19         | regulator of G-protein signaling 19                                                      | 2             |           |             |            |            | 2.04       | 1.87        |                                                  |            |            |
| 16978   | Lrrrip1       | leucine rich repeat (in FLII) interacting protein 1                                      | 2             |           |             |            |            | 1.99       | 1.87        |                                                  |            |            |
| 73230   | Bmper         | BMP-binding endothelial regulator                                                        | 2             |           |             |            |            | 2.25       | 1.85        |                                                  |            |            |
| 12363   | Casp4         | caspase 4, apoptosis-related cysteine peptidase                                          | 2             |           |             |            |            | 2.12       | 1.84        |                                                  |            |            |
| 74732   | Stx11         | syntaxin 11                                                                              | 2             |           |             |            |            | 2.08       | 1.84        |                                                  |            |            |
| 57778   | Fmn1          | formin-like 1                                                                            | 2             |           |             |            |            | 2.11       | 1.83        |                                                  |            |            |
| 14537   | Gcnt1         | glucosaminyl (N-acetyl) transferase 1, core 2                                            | 2             |           |             |            |            | 1.62       | 1.83        |                                                  |            |            |
| 270198  | Pfkfb4        | 6-phosphofructo-2-kinase/fructose-2,6-bisphosphatase 4                                   | 2             |           |             |            |            | 1.87       | 1.83        |                                                  |            |            |
| 57914   | Crif2         | cytokine receptor-like factor 2                                                          | 2             |           |             |            |            | 2.38       | 1.82        |                                                  |            |            |
| 229694  | AI504432      | expressed sequence AI504432                                                              | 2             |           |             |            |            | 1.94       | 1.82        |                                                  |            |            |
| 57441   | Gmnn          | geminin                                                                                  | 2             |           |             |            |            | 1.86       | 1.81        |                                                  |            |            |
| 110006  | Gusb          | glucuronidase, beta                                                                      | 2             |           |             |            |            | 1.85       | 1.80        |                                                  |            |            |
| 71706   | Slc46a3       | solute carrier family 46, member 3                                                       | 2             |           |             |            |            | 1.74       | 1.80        |                                                  |            |            |
| 20292   | Ccl11         | chemokine (C-C motif) ligand 11                                                          | 2             |           |             |            |            | 1.62       | 1.79        |                                                  |            |            |
| 12642   | Ch25h         | cholesterol 25-hydroxylase                                                               | 2             |           |             |            |            | 1.70       | 1.79        |                                                  |            |            |
| 20677   | Sox4          | SRY-box containing gene 4                                                                | 2             |           |             |            |            | 1.90       | 1.78        |                                                  |            |            |

| Gene ID   | Symbol        | Description                                                                                        | DEG/Set count | 2mWT_2mKO | 20mWT_20mKO | 2mKO_20mKO | 2mWT_20mWT | 2mWT_30mWT | 20mWT_30mWT | Literature-Mining (Aging-Cholesterol literature) |            |            |
|-----------|---------------|----------------------------------------------------------------------------------------------------|---------------|-----------|-------------|------------|------------|------------|-------------|--------------------------------------------------|------------|------------|
|           |               |                                                                                                    |               | 9         | 230         | 406        | 48         | 1904       | 1157        | #Paper                                           | Enrichment | BH P-value |
| 14469     | Gbp2          | guanylate binding protein 2                                                                        | 2             |           |             |            |            | 1.85       | 1.77        |                                                  |            |            |
| 20878     | Aurka         | aurora kinase A                                                                                    | 2             |           |             |            |            | 1.63       | 1.77        |                                                  |            |            |
| 209760    | Tmc7          | transmembrane channel-like gene family 7                                                           | 2             |           |             |            |            | 2.12       | 1.77        |                                                  |            |            |
| 16565     | Kif21b        | kinesin family member 21B                                                                          | 2             |           |             |            |            | 1.69       | 1.76        |                                                  |            |            |
| 14151     | Fech          | ferrochelatase                                                                                     | 2             |           |             |            |            | 1.81       | 1.76        | 1                                                | 5.3        | 0.24       |
| 16426     | Itih3         | inter-alpha trypsin inhibitor, heavy chain 3                                                       | 2             |           |             |            |            | 2.48       | 1.76        |                                                  |            |            |
| 320587    | Tmem88b       | transmembrane protein 88B                                                                          | 2             |           |             |            |            | 1.65       | 1.76        |                                                  |            |            |
| 74568     | Mkl1          | mixed lineage kinase domain-like                                                                   | 2             |           |             |            |            | 1.86       | 1.75        |                                                  |            |            |
| 12702     | Socs3         | suppressor of cytokine signaling 3                                                                 | 2             |           |             |            |            | 1.80       | 1.75        | 3                                                | 8.8        | 0.02       |
| 20911     | Stxbp2        | syntaxin binding protein 2                                                                         | 2             |           | 1.50        |            |            |            | 1.75        |                                                  |            |            |
| 14187     | Akr1b8        | aldo-keto reductase family 1, member B8                                                            | 2             |           |             |            |            | 1.81       | 1.74        |                                                  |            |            |
| 12505     | Cd44          | CD44 antigen                                                                                       | 2             |           |             |            |            | 2.54       | 1.73        | 3                                                | 1.4        | 0.54       |
| 212398    | Frat2         | frequently rearranged in advanced T-cell lymphomas 2                                               | 2             |           |             |            |            | 1.55       | 1.73        |                                                  |            |            |
| 74637     | Shpk          | sedoheptulokinase                                                                                  | 2             |           |             |            |            | 1.67       | 1.72        |                                                  |            |            |
| 13803     | Enc1          | ectodermal-neural cortex 1                                                                         | 2             |           |             |            |            | 1.73       | 1.72        |                                                  |            |            |
| 217826    | Kcnk13        | potassium channel, subfamily K, member 13                                                          | 2             |           |             |            |            | 1.42       | 1.71        |                                                  |            |            |
| 22350     | Ezr           | ezrin                                                                                              | 2             |           |             |            |            | 1.96       | 1.69        |                                                  |            |            |
| 233979    | Tpcn2         | two pore segment channel 2                                                                         | 2             |           |             |            |            | 1.57       | 1.69        |                                                  |            |            |
| 27060     | Tcirg1        | T-cell, immune regulator 1, ATPase, H+ transporting, lysosomal V0 protein A3                       | 2             |           |             |            |            | 1.67       | 1.68        |                                                  |            |            |
| 71436     | Flrt3         | fibronectin leucine rich transmembrane protein 3                                                   | 2             |           |             |            |            | 2.36       | 1.68        |                                                  |            |            |
| 73649     | Cybrd1        | cytochrome b reductase 1                                                                           | 2             |           |             |            |            | 1.59       | 1.68        |                                                  |            |            |
| 109901    | Cela1         | chymotrypsin-like elastase family, member 1                                                        | 2             |           |             |            |            | 2.56       | 1.67        |                                                  |            |            |
| 64540     | Tspan4        | tetraspanin 4                                                                                      | 2             |           |             |            |            | 1.55       | 1.67        |                                                  |            |            |
| 215748    | Cnksr3        | Cnksr family member 3                                                                              | 2             |           |             |            |            | 1.57       | 1.67        |                                                  |            |            |
| 108150    | Galnt7        | UDP-N-acetyl-alpha-D-galactosamine: polypeptide N-acetylgalactosaminyltransferase 7                | 2             |           |             |            |            | 1.90       | 1.67        |                                                  |            |            |
| 18081     | Ninj1         | ninjurin 1                                                                                         | 2             |           |             |            |            | 1.82       | 1.67        |                                                  |            |            |
| 93692     | Glxr          | glutaredoxin                                                                                       | 2             |           |             |            |            | 2.56       | 1.67        | 1                                                | 5.7        | 0.23       |
| 210094    | Igln5         | IgLON family member 5                                                                              | 2             |           |             |            |            | 2.10       | 1.67        |                                                  |            |            |
| 11830     | Aqp5          | aquaporin 5                                                                                        | 2             |           |             |            |            | 1.76       | 1.67        |                                                  |            |            |
| 107581    | Col16a1       | collagen, type XVI, alpha 1                                                                        | 2             |           |             |            |            | 1.56       | 1.66        |                                                  |            |            |
| 226421    | 5430435G22Rik | RIKEN cDNA 5430435G22 gene                                                                         | 2             |           |             |            |            | 1.38       | 1.66        |                                                  |            |            |
| 69069     | 1810011H11Rik | RIKEN cDNA 1810011H11 gene                                                                         | 2             |           |             |            |            | 1.58       | 1.66        |                                                  |            |            |
| 27279     | Tnfrsf12a     | tumor necrosis factor receptor superfamily, member 12a                                             | 2             |           |             |            |            | 2.25       | 1.66        |                                                  |            |            |
| 12018     | Bak1          | BCL2-antagonist/killer 1                                                                           | 2             |           |             |            |            | 2.05       | 1.66        |                                                  |            |            |
| 13618     | EdnrB         | endothelin receptor type B                                                                         | 2             |           |             |            |            | 1.60       | 1.66        |                                                  |            |            |
| 71797     | Chst13        | carbohydrate (chondroitin 4) sulfotransferase 13                                                   | 2             |           |             |            |            | 2.01       | 1.65        |                                                  |            |            |
| 80859     | Nfkbiz        | nuclear factor of kappa light polypeptide gene enhancer in B-cells inhibitor, zeta                 | 2             |           |             |            |            | 2.02       | 1.65        |                                                  |            |            |
| 69309     | Slc16a13      | solute carrier family 16 (monocarboxylic acid transporters), member 13                             | 2             |           |             |            | -1.52      |            | 1.64        |                                                  |            |            |
| 19092     | Prkg2         | protein kinase, cGMP-dependent, type II                                                            | 2             |           |             |            |            | 2.31       | 1.63        |                                                  |            |            |
| 384198    | Fam47e        | family with sequence similarity 47, member E                                                       | 2             | -1.87     |             |            |            |            | 1.62        |                                                  |            |            |
| 16513     | Kcnj10        | potassium inwardly-rectifying channel, subfamily J, member 10                                      | 2             |           |             |            |            | 2.37       | 1.61        |                                                  |            |            |
| 12273     | C5ar1         | complement component 5a receptor 1                                                                 | 2             |           |             |            |            | 1.67       | 1.61        |                                                  |            |            |
| 320840    | Negr1         | neuronal growth regulator 1                                                                        | 2             |           |             |            |            | 1.54       | 1.61        |                                                  |            |            |
| 23871     | Ets1          | E26 avian leukemia oncogene 1, 5' domain                                                           | 2             |           |             |            |            | 1.98       | 1.60        |                                                  |            |            |
| 12125     | Bcl2l1        | BCL2-like 11 (apoptosis facilitator)                                                               | 2             |           |             |            |            | 1.55       | 1.60        |                                                  |            |            |
| 104681    | Slc16a6       | solute carrier family 16 (monocarboxylic acid transporters), member 6                              | 2             |           |             |            |            | 1.97       | 1.60        |                                                  |            |            |
| 12091     | Glb1          | galactosidase, beta 1                                                                              | 2             |           | 1.24        |            |            |            | 1.60        |                                                  |            |            |
| 71862     | Gpr160        | G protein-coupled receptor 160                                                                     | 2             |           |             |            |            | 1.42       | 1.60        |                                                  |            |            |
| 235283    | Gramd1b       | GRAM domain containing 1B                                                                          | 2             |           |             |            |            | 1.87       | 1.59        |                                                  |            |            |
| 16164     | Il13ra1       | interleukin 13 receptor, alpha 1                                                                   | 2             |           |             |            |            | 1.70       | 1.59        |                                                  |            |            |
| 12260     | C1qb          | complement component 1, q subcomponent, beta polypeptide                                           | 2             |           |             |            |            | 1.54       | 1.58        |                                                  |            |            |
| 69976     | Galk2         | galactokinase 2                                                                                    | 2             |           |             |            |            | 1.40       | 1.57        |                                                  |            |            |
| 12443     | Ccnd1         | cyclin D1                                                                                          | 2             |           |             |            |            | 1.76       | 1.57        | 1                                                | 0.4        | 0.77       |
| 20893     | Bhlhe40       | basic helix-loop-helix family, member e40                                                          | 2             |           |             |            |            | 1.38       | 1.57        |                                                  |            |            |
| 68713     | Ifitm1        | interferon induced transmembrane protein 1                                                         | 2             |           |             |            |            | 1.59       | 1.57        |                                                  |            |            |
| 16889     | Lipa          | lysosomal acid lipase A                                                                            | 2             |           |             |            |            | 1.49       | 1.57        | 8                                                | 49.2       | 1.95E-10   |
| 17768     | Mthfd2        | methylenetetrahydrofolate dehydrogenase (NAD+ dependent), methylenetetrahydrofolate cyclohydrolase | 2             |           |             |            |            | 1.57       | 1.56        |                                                  |            |            |
| 54353     | Skap2         | src family associated phosphoprotein 2                                                             | 2             |           |             |            |            | 1.66       | 1.55        |                                                  |            |            |
| 27756     | Lsm2          | LSM2 homolog, U6 small nuclear RNA associated (S. cerevisiae)                                      | 2             |           |             |            |            | 1.66       | 1.55        |                                                  |            |            |
| 17750     | Mt2           | metallothionein 2                                                                                  | 2             |           |             |            |            | 1.72       | 1.55        |                                                  |            |            |
| 13175     | Dclk1         | doublecortin-like kinase 1                                                                         | 2             |           |             |            |            | 1.78       | 1.55        |                                                  |            |            |
| 69550     | Bst2          | bone marrow stromal cell antigen 2                                                                 | 2             |           |             |            |            | 1.99       | 1.54        |                                                  |            |            |
| 330812    | Rnf150        | ring finger protein 150                                                                            | 2             |           |             |            |            | 1.88       | 1.54        |                                                  |            |            |
| 23965     | Odz3          | odd Oz/ten-m homolog 3 (Drosophila)                                                                | 2             |           |             |            |            | 1.52       | 1.54        |                                                  |            |            |
| 192654    | Pla2g15       | phospholipase A2, group XV                                                                         | 2             |           |             |            |            | 1.60       | 1.54        |                                                  |            |            |
| 67876     | Coq10b        | coenzyme Q10 homolog B (S. cerevisiae)                                                             | 2             |           |             |            |            | 1.67       | 1.53        |                                                  |            |            |
| 20397     | Sgpl1         | sphingosine phosphate lyase 1                                                                      | 2             |           |             |            |            | 1.59       | 1.53        |                                                  |            |            |
| 100043272 | 5430417L22Rik | RIKEN cDNA 5430417L22 gene                                                                         | 2             |           |             |            |            | 1.90       | 1.52        |                                                  |            |            |
| 18301     | Fxyd5         | FXD domain-containing ion transport regulator 5                                                    | 2             |           |             |            |            | 1.67       | 1.51        |                                                  |            |            |
| 11568     | Aebp1         | AE binding protein 1                                                                               | 2             |           |             |            |            | 1.57       | 1.51        |                                                  |            |            |
| 244864    | Layn          | layilin                                                                                            | 2             |           |             |            |            | 1.49       | 1.51        |                                                  |            |            |

| Gene ID   | Symbol        | Description                                                                                  | DEG/Set count | 2mWT_2mKO | 20mWT_20mKO | 2mKO_20mKO | 2mWT_20mWT | 2mWT_30mWT | 20mWT_30mWT | Literature-Mining (Aging-Cholesterol literature) |            |            |
|-----------|---------------|----------------------------------------------------------------------------------------------|---------------|-----------|-------------|------------|------------|------------|-------------|--------------------------------------------------|------------|------------|
|           |               |                                                                                              |               | 9         | 230         | 406        | 48         | 1904       | 1157        | #Paper                                           | Enrichment | BH P-value |
| 14824     | Gm            | granulin                                                                                     | 2             |           |             |            |            | 1.33       | 1.50        |                                                  |            |            |
| 574403    | Fam196b       | family with sequence similarity 196, member B                                                | 2             |           |             |            |            | 1.87       | 1.50        |                                                  |            |            |
| 239027    | Arhgap22      | Rho GTPase activating protein 22                                                             | 2             |           |             |            |            | 1.46       | 1.49        |                                                  |            |            |
| 22287     | Scgb1a1       | secretoglobin, family 1A, member 1 (uteroglobin)                                             | 2             |           |             |            |            | 1.53       | 1.49        |                                                  |            |            |
| 67702     | Rnf149        | ring finger protein 149                                                                      | 2             |           |             |            |            | 1.89       | 1.49        |                                                  |            |            |
| 68089     | Arpc4         | actin related protein 2/3 complex, subunit 4                                                 | 2             |           |             |            |            | 2.03       | 1.48        |                                                  |            |            |
| 20716     | Serpina3n     | serine (or cysteine) peptidase inhibitor, clade A, member 3N                                 | 2             |           |             |            |            | 1.84       | 1.48        | 2                                                | 4.3        | 0.15       |
| 433256    | Acsi5         | acyl-CoA synthetase long-chain family member 5                                               | 2             |           |             |            |            | 1.54       | 1.48        |                                                  |            |            |
| 100504422 |               | NA                                                                                           | 2             |           |             |            |            | 1.53       | 1.48        |                                                  |            |            |
| 67168     | Lpar6         | lysophosphatidic acid receptor 6                                                             | 2             |           |             |            |            | 1.45       | 1.47        |                                                  |            |            |
| 16477     | Junb          | Jun-B oncogene                                                                               | 2             |           |             |            |            | 1.87       | 1.47        |                                                  |            |            |
| 212555    | Pqhc2         | PQ loop repeat containing 2                                                                  | 2             |           |             |            |            | 1.47       | 1.47        |                                                  |            |            |
| 12509     | Cd59a         | CD59a antigen                                                                                | 2             |           |             |            |            | 1.33       | 1.46        |                                                  |            |            |
| 101476    | Plekha1       | pleckstrin homology domain containing, family A (phosphoinositide binding specific) member 1 | 2             |           |             |            |            | 1.64       | 1.46        |                                                  |            |            |
| 219140    | Spata13       | spermatogenesis associated 13                                                                | 2             |           |             |            |            | 1.53       | 1.45        |                                                  |            |            |
| 57784     | Bin3          | bridging integrator 3                                                                        | 2             |           |             |            |            | 1.45       | 1.45        |                                                  |            |            |
| 74182     | Gpcpd1        | glycerophosphocholine phosphodiesterase GDE1 homolog (S. cerevisiae)                         | 2             |           |             |            |            | 1.60       | 1.45        |                                                  |            |            |
| 373864    | Col27a1       | collagen, type XXVII, alpha 1                                                                | 2             |           |             |            |            | 1.48       | 1.45        |                                                  |            |            |
| 20908     | Stx3          | syntaxin 3                                                                                   | 2             |           |             |            |            | 1.58       | 1.45        |                                                  |            |            |
| 76448     | 2310014H01Rik | protein phosphatase 1, regulatory subunit 18                                                 | 2             |           | 1.30        |            |            |            | 1.45        |                                                  |            |            |
| 20349     | Sema3e        | sema domain, immunoglobulin domain (Ig), short basic domain, secreted, (semaphorin) 3E       | 2             |           |             |            |            | 1.61       | 1.45        |                                                  |            |            |
| 18438     | P2rx4         | purinergic receptor P2X, ligand-gated ion channel 4                                          | 2             |           |             |            |            | 1.59       | 1.44        |                                                  |            |            |
| 69399     | 1700025G04Rik | RIKEN cDNA 1700025G04 gene                                                                   | 2             |           |             |            |            | 1.42       | 1.44        |                                                  |            |            |
| 72293     | Nkd2          | naked cuticle 2 homolog (Drosophila)                                                         | 2             |           |             |            |            | 1.44       | 1.43        |                                                  |            |            |
| 20017     | Polr1b        | polymerase (RNA) I polypeptide B                                                             | 2             |           | 1.33        |            |            |            | 1.43        |                                                  |            |            |
| 218203    | Myliip        | myosin regulatory light chain interacting protein                                            | 2             |           |             |            |            | 1.92       | 1.43        |                                                  |            |            |
| 14766     | Gpr56         | G protein-coupled receptor 56                                                                | 2             |           |             |            |            | 1.92       | 1.42        |                                                  |            |            |
| 231871    | Daglb         | diacylglycerol lipase, beta                                                                  | 2             |           |             |            |            | 1.40       | 1.42        |                                                  |            |            |
| 80752     | Fam20c        | family with sequence similarity 20, member C                                                 | 2             |           |             |            |            | 1.29       | 1.42        | 1                                                | 14.1       | 0.14       |
| 67223     | Rrp15         | ribosomal RNA processing 15 homolog (S. cerevisiae)                                          | 2             |           |             |            |            | 1.77       | 1.42        |                                                  |            |            |
| 16188     | Il3ra         | interleukin 3 receptor, alpha chain                                                          | 2             |           | 1.43        |            |            |            | 1.41        |                                                  |            |            |
| 23790     | Coro1c        | coronin, actin binding protein 1C                                                            | 2             |           |             |            |            | 1.75       | 1.41        |                                                  |            |            |
| 66950     | Tmem206       | transmembrane protein 206                                                                    | 2             |           |             |            |            | 1.62       | 1.40        |                                                  |            |            |
| 16952     | Anxa1         | annexin A1                                                                                   | 2             |           |             |            |            | 1.64       | 1.40        |                                                  |            |            |
| 21346     | Tagln2        | transgelin 2                                                                                 | 2             |           |             |            | 1.28       |            | 1.40        |                                                  |            |            |
| 52552     | Parp8         | poly (ADP-ribose) polymerase family, member 8                                                | 2             |           |             |            |            | 1.55       | 1.40        |                                                  |            |            |
| 19171     | Psmb10        | proteasome (prosome, macropain) subunit, beta type 10                                        | 2             |           |             |            |            | 1.51       | 1.40        |                                                  |            |            |
| 14284     | Fosl2         | fos-like antigen 2                                                                           | 2             |           |             |            |            | 1.37       | 1.40        |                                                  |            |            |
| 216742    | Fnip1         | folliculin interacting protein 1                                                             | 2             |           |             |            |            | 1.66       | 1.40        |                                                  |            |            |
| 64138     | Ctsz          | cathepsin Z                                                                                  | 2             |           |             |            |            | 1.48       | 1.40        |                                                  |            |            |
| 72640     | Mex3a         | mex3 homolog A (C. elegans)                                                                  | 2             |           |             |            |            | 1.46       | 1.40        |                                                  |            |            |
| 58194     | Sh3kbp1       | SH3-domain kinase binding protein 1                                                          | 2             |           |             |            |            | 1.62       | 1.40        |                                                  |            |            |
| 13008     | Csrp2         | cysteine and glycine-rich protein 2                                                          | 2             |           |             |            |            | 1.53       | 1.39        |                                                  |            |            |
| 67603     | Dusp6         | dual specificity phosphatase 6                                                               | 2             |           |             |            |            | 1.82       | 1.38        |                                                  |            |            |
| 16558     | Kif16b        | kinesin family member 16B                                                                    | 2             |           |             |            |            | 1.62       | 1.38        |                                                  |            |            |
| 66042     | Sostdc1       | sclerostin domain containing 1                                                               | 2             |           |             |            |            | 1.43       | 1.37        |                                                  |            |            |
| 11307     | Abcg1         | ATP-binding cassette, sub-family G (WHITE), member 1                                         | 2             |           |             |            |            | 1.68       | 1.37        | 14                                               | 161.6      | 5.50E-25   |
| 11605     | Gla           | galactosidase, alpha                                                                         | 2             |           |             |            |            | 1.46       | 1.36        | 3                                                | 5.7        | 0.05       |
| 66249     | Pno1          | partner of NOB1 homolog (S. cerevisiae)                                                      | 2             |           |             |            |            | 1.57       | 1.36        |                                                  |            |            |
| 330836    | Slc7a6        | solute carrier family 7 (cationic amino acid transporter, y+ system), member 6               | 2             |           |             |            |            | 1.41       | 1.35        |                                                  |            |            |
| 15211     | Hexa          | hexosaminidase A                                                                             | 2             |           |             |            |            | 1.37       | 1.35        |                                                  |            |            |
| 109778    | Blvra         | biliverdin reductase A                                                                       | 2             |           |             |            |            | 1.34       | 1.34        | 1                                                | 45.9       | 0.06       |
| 547253    | Parp14        | poly (ADP-ribose) polymerase family, member 14                                               | 2             |           |             |            |            | 1.35       | 1.34        |                                                  |            |            |
| 107702    | Rnh1          | ribonuclease/angiogenin inhibitor 1                                                          | 2             |           |             |            |            | 1.36       | 1.33        |                                                  |            |            |
| 218454    | Lhfp12        | lipoma HMGIC fusion partner-like 2                                                           | 2             |           |             |            |            | 1.45       | 1.33        |                                                  |            |            |
| 13732     | Emp3          | epithelial membrane protein 3                                                                | 2             |           |             |            |            | 1.39       | 1.33        |                                                  |            |            |
| 83768     | Dpp7          | dipeptidylpeptidase 7                                                                        | 2             |           |             |            |            | 1.47       | 1.32        |                                                  |            |            |
| 54135     | Lsr           | lipolysis stimulated lipoprotein receptor                                                    | 2             |           |             |            |            | 1.52       | 1.32        | 1                                                | 77.1       | 0.04       |
| 21887     | Tle3          | transducin-like enhancer of split 3, homolog of Drosophila E(spl)                            | 2             |           |             |            |            | 1.38       | 1.32        |                                                  |            |            |
| 216869    | Arrb2         | arrestin, beta 2                                                                             | 2             |           |             |            |            | 1.31       | 1.32        |                                                  |            |            |
| 66912     | Bzw2          | basic leucine zipper and W2 domains 2                                                        | 2             |           |             |            |            | 1.32       | 1.32        |                                                  |            |            |
| 103711    | Pnpo          | pyridoxine 5'-phosphate oxidase                                                              | 2             |           |             |            |            | 1.37       | 1.31        |                                                  |            |            |
| 14457     | Gas7          | growth arrest specific 7                                                                     | 2             |           |             |            |            | 1.28       | 1.31        |                                                  |            |            |
| 239857    | Cadm2         | cell adhesion molecule 2                                                                     | 2             |           |             |            |            | 1.54       | 1.31        |                                                  |            |            |
| 192192    | Shkbp1        | Sh3kbp1 binding protein 1                                                                    | 2             |           |             |            |            | 1.35       | 1.30        |                                                  |            |            |
| 19156     | Psap          | prosaposin                                                                                   | 2             |           |             |            |            | 1.55       | 1.30        |                                                  |            |            |
| 66988     | Lap3          | leucine aminopeptidase 3                                                                     | 2             |           |             |            |            | 1.47       | 1.30        | 2                                                | 5.7        | 0.11       |
| 270685    | Mthfd1l       | methylenetetrahydrofolate dehydrogenase (NADP+ dependent) 1-like                             | 2             |           |             |            |            | 1.47       | 1.30        |                                                  |            |            |
| 52530     | Nhp2          | NHP2 ribonucleoprotein homolog (yeast)                                                       | 2             |           |             |            |            | 1.42       | 1.30        |                                                  |            |            |
| 54725     | Cadm1         | cell adhesion molecule 1                                                                     | 2             |           |             |            |            | 1.48       | 1.29        | 1                                                | 2.7        | 0.38       |
| 71839     | Osgin1        | oxidative stress induced growth inhibitor 1                                                  | 2             |           |             |            |            | 1.40       | 1.29        |                                                  |            |            |
| 226351    | Tmem185b      | transmembrane protein 185B                                                                   | 2             |           |             |            |            | 1.35       | 1.29        |                                                  |            |            |



| Gene ID | Symbol        | Description                                                                               | DEG/Set count | 2mWT_2mKO | 20mWT_20mKO | 2mKO_20mKO | 2mWT_20mWT | 2mWT_30mWT | 20mWT_30mWT | Literature-Mining (Aging-Cholesterol literature) |            |            |
|---------|---------------|-------------------------------------------------------------------------------------------|---------------|-----------|-------------|------------|------------|------------|-------------|--------------------------------------------------|------------|------------|
|         |               |                                                                                           |               | 9         | 230         | 406        | 48         | 1904       | 1157        | #Paper                                           | Enrichment | BH P-value |
| 67239   | Rpf2          | ribosome production factor 2 homolog (S. cerevisiae)                                      | 2             |           |             |            |            | 1.37       | 1.29        |                                                  |            |            |
| 331623  | Bend3         | BEN domain containing 3                                                                   | 2             |           |             |            |            | 1.34       | 1.28        |                                                  |            |            |
| 70396   | Asnsd1        | asparagine synthetase domain containing 1                                                 | 2             |           |             |            |            | 1.31       | 1.28        |                                                  |            |            |
| 15369   | Hmox2         | heme oxygenase (decycling) 2                                                              | 2             |           |             |            |            | 1.35       | 1.27        | 1                                                | 4          | 0.29       |
| 11306   | Abcb7         | ATP-binding cassette, sub-family B (MDR/TAP), member 7                                    | 2             |           |             |            |            | 1.38       | 1.27        |                                                  |            |            |
| 66440   | Cdc26         | cell division cycle 26                                                                    | 2             |           |             |            |            | 1.24       | 1.26        |                                                  |            |            |
| 13014   | Cstb          | cystatin B                                                                                | 2             |           |             |            |            | 1.26       | 1.26        |                                                  |            |            |
| 16476   | Jun           | Jun oncogene                                                                              | 2             |           |             |            |            | 1.66       | 1.26        | 11                                               | 2.2        | 0.06       |
| 20720   | Serpine2      | serine (or cysteine) peptidase inhibitor, clade E, member 2                               | 2             |           |             |            |            | 1.35       | 1.26        | 2                                                | 4.6        | 0.14       |
| 13653   | Egr1          | early growth response 1                                                                   | 2             |           |             |            |            | 1.33       | 1.26        | 1                                                | 1.2        | 0.61       |
| 102162  | Taf5l         | TAF5-like RNA polymerase II, p300/CBP-associated factor (PCAF)-associated factor          | 2             |           |             |            |            | 1.45       | 1.25        |                                                  |            |            |
| 52705   | Krr1          | KRR1, small subunit (SSU) processome component, homolog (yeast)                           | 2             |           |             |            |            | 1.28       | 1.25        |                                                  |            |            |
| 243914  | Lgi4          | leucine-rich repeat LGI family, member 4                                                  | 2             |           |             |            |            | 1.39       | 1.25        |                                                  |            |            |
| 11977   | Atp7a         | ATPase, Cu++ transporting, alpha polypeptide                                              | 2             |           |             |            |            | 1.38       | 1.24        |                                                  |            |            |
| 27361   | Sepx1         | selenoprotein X 1                                                                         | 2             |           |             |            |            | 1.34       | 1.24        | 1                                                | 17.6       | 0.12       |
| 74315   | Rnf145        | ring finger protein 145                                                                   | 2             |           |             |            |            | 1.33       | 1.24        |                                                  |            |            |
| 13200   | Ddost         | dolichyl-di-phosphooligosaccharide-protein glycotransferase                               | 2             |           |             |            |            | 1.28       | 1.23        |                                                  |            |            |
| 77889   | Lbh           | limb-bud and heart                                                                        | 2             |           |             |            |            | 1.30       | 1.23        |                                                  |            |            |
| 12751   | Tpp1          | tripeptidyl peptidase I                                                                   | 2             |           |             |            |            | 1.29       | 1.22        | 1                                                | 2.5        | 0.40       |
| 108682  | Gpt2          | glutamic pyruvate transaminase (alanine aminotransferase) 2                               | 2             |           |             |            |            | 1.37       | 1.22        |                                                  |            |            |
| 211914  | Asap2         | ArfGAP with SH3 domain, ankyrin repeat and PH domain 2                                    | 2             |           |             |            |            | 1.32       | 1.22        |                                                  |            |            |
| 74919   | 4930471M23Rik | RIKEN cDNA 4930471M23 gene                                                                | 2             |           |             |            |            | 1.21       | 1.22        |                                                  |            |            |
| 75612   | Gns           | glucosamine (N-acetyl)-6-sulfatase                                                        | 2             |           |             |            |            | 1.24       | 1.22        |                                                  |            |            |
| 20971   | Sdc4          | syndecan 4                                                                                | 2             |           |             |            |            | 1.44       | 1.21        |                                                  |            |            |
| 12345   | Capzb         | capping protein (actin filament) muscle Z-line, beta                                      | 2             |           |             |            |            | 1.34       | 1.21        |                                                  |            |            |
| 66390   | Slmo2         | slowmo homolog 2 (Drosophila)                                                             | 2             |           |             |            |            | 1.33       | 1.20        |                                                  |            |            |
| 27984   | Efh2          | EF hand domain containing 2                                                               | 2             |           |             |            |            | 1.38       | 1.20        |                                                  |            |            |
| 19352   | Rabggtb       | RAB geranylgeranyl transferase, b subunit                                                 | 2             |           |             |            |            | 1.25       | 1.19        |                                                  |            |            |
| 66125   | Sf3b5         | splicing factor 3b, subunit 5                                                             | 2             |           |             |            |            | 1.27       | 1.16        |                                                  |            |            |
| 102462  | Imp3          | IMP3, U3 small nucleolar ribonucleoprotein, homolog (yeast)                               | 2             |           |             |            |            | 1.16       | 1.16        |                                                  |            |            |
| 68479   | Phf5a         | PHD finger protein 5A                                                                     | 2             |           |             |            |            | 1.15       | 1.15        |                                                  |            |            |
| 67808   | Tprgl         | transformation related protein 63 regulated like                                          | 2             |           |             |            |            | -1.16      | -1.09       |                                                  |            |            |
| 22630   | Ywhaq         | tyrosine 3-monooxygenase/tryptophan 5-monooxygenase activation protein, theta polypeptide | 2             |           |             |            |            | -1.12      | -1.10       | 3                                                | 9.7        | 0.02       |
| 20692   | Sparc         | secreted acidic cysteine rich glycoprotein                                                | 2             |           |             |            |            | -1.12      | -1.11       |                                                  |            |            |
| 18858   | Pmp22         | peripheral myelin protein 22                                                              | 2             |           |             |            |            | -1.22      | -1.13       | 2                                                | 8.9        | 0.06       |
| 13179   | Dcn           | decorin                                                                                   | 2             |           |             |            |            | -1.14      | -1.14       | 1                                                | 2          | 0.46       |
| 17196   | Mbp           | myelin basic protein                                                                      | 2             |           |             |            |            | -1.17      | -1.14       | 6                                                | 3.4        | 0.03       |
| 66915   | Myeov2        | myeloma overexpressed 2                                                                   | 2             |           |             |            |            | -1.12      | -1.14       |                                                  |            |            |
| 20655   | Sod1          | superoxide dismutase 1, soluble                                                           | 2             |           |             |            |            | -1.17      | -1.14       | 46                                               | 5.2        | 2.24E-17   |
| 83493   | Sacm1l        | SAC1 (suppressor of actin mutations 1, homolog)-like (S. cerevisiae)                      | 2             |           |             |            |            | -1.16      | -1.14       |                                                  |            |            |
| 56350   | Arl3          | ADP-ribosylation factor-like 3                                                            | 2             |           |             |            |            | -1.20      | -1.15       |                                                  |            |            |
| 21807   | Tsc22d1       | TSC22 domain family, member 1                                                             | 2             |           |             |            |            | -1.15      | -1.15       |                                                  |            |            |
| 11737   | Anp32a        | acidic (leucine-rich) nuclear phosphoprotein 32 family, member A                          | 2             |           |             |            |            | -1.18      | -1.16       |                                                  |            |            |
| 69642   | 2310046A06Rik | RIKEN cDNA 2310046A06 gene                                                                | 2             |           |             |            |            | -1.24      | -1.18       |                                                  |            |            |
| 12575   | Cdkn1a        | cyclin-dependent kinase inhibitor 1A (P21)                                                | 2             |           |             |            |            | -1.23      | -1.18       | 6                                                | 1.7        | 0.25       |
| 14677   | Gnai1         | guanine nucleotide binding protein (G protein), alpha inhibiting 1                        | 2             |           |             |            |            | -1.15      | -1.18       |                                                  |            |            |
| 68721   | 1110032A03Rik | RIKEN cDNA 1110032A03 gene                                                                | 2             |           |             |            |            | -1.18      | -1.18       |                                                  |            |            |
| 100532  | Rel1          | RELT-like 1                                                                               | 2             |           |             |            |            | -1.25      | -1.18       |                                                  |            |            |
| 106581  | Itfg3         | integrin alpha FG-GAP repeat containing 3                                                 | 2             |           |             |            |            | -1.45      | -1.19       |                                                  |            |            |
| 229877  | Rap1gds1      | RAP1, GTP-GDP dissociation stimulator 1                                                   | 2             |           |             |            |            | -1.23      | -1.19       |                                                  |            |            |
| 24100   | Tpra1         | transmembrane protein, adipocyte associated 1                                             | 2             |           |             |            |            | -1.24      | -1.19       |                                                  |            |            |
| 76267   | Fads1         | fatty acid desaturase 1                                                                   | 2             |           |             |            |            | -1.37      | -1.19       | 3                                                | 42.9       | 4.13E-04   |
| 109232  | Sccpdh        | saccharopine dehydrogenase (putative)                                                     | 2             |           |             |            |            | -1.17      | -1.19       |                                                  |            |            |
| 57342   | Parva         | parvin, alpha                                                                             | 2             |           |             |            |            | -1.25      | -1.19       |                                                  |            |            |
| 18187   | Nrp2          | neuropilin 2                                                                              | 2             |           |             |            |            | -1.21      | -1.20       |                                                  |            |            |
| 68070   | Pdz2          | PDZ domain containing 2                                                                   | 2             |           |             |            |            | -1.22      | -1.20       |                                                  |            |            |
| 319939  | Tns3          | tensin 3                                                                                  | 2             |           |             |            |            | -1.20      | -1.20       |                                                  |            |            |
| 18611   | Pea15a        | phosphoprotein enriched in astrocytes 15A                                                 | 2             |           |             |            |            | -1.27      | -1.20       |                                                  |            |            |
| 75580   | Zbtb4         | zinc finger and BTB domain containing 4                                                   | 2             |           |             |            |            | -1.15      | -1.20       |                                                  |            |            |
| 68972   | Tatdn3        | TatD DNase domain containing 3                                                            | 2             |           |             |            |            | -1.48      | -1.21       |                                                  |            |            |
| 58521   | Eid1          | EP300 interacting inhibitor of differentiation 1                                          | 2             |           |             |            |            | -1.26      | -1.21       |                                                  |            |            |
| 246049  | Slc36a2       | solute carrier family 36 (proton/amino acid symporter), member 2                          | 2             |           |             |            |            | -1.28      | -1.21       |                                                  |            |            |
| 224273  | Crybg3        | beta-gamma crystallin domain containing 3                                                 | 2             |           |             |            |            | -1.25      | -1.21       |                                                  |            |            |
| 252864  | Dusp15        | dual specificity phosphatase-like 15                                                      | 2             |           |             |            |            | -1.31      | -1.22       |                                                  |            |            |
| 54366   | Cttna1        | catenin (cadherin associated protein), alpha-like 1                                       | 2             |           |             |            |            | -1.40      | -1.22       |                                                  |            |            |

| Gene ID   | Symbol        | Description                                                                                                   | DEG/Set count | 2mWT_2mKO | 20mWT_20mKO | 2mKO_20mKO | 2mWT_20mWT | 2mWT_30mWT | 20mWT_30mWT | Literature-Mining (Aging-Cholesterol literature) |            |            |
|-----------|---------------|---------------------------------------------------------------------------------------------------------------|---------------|-----------|-------------|------------|------------|------------|-------------|--------------------------------------------------|------------|------------|
|           |               |                                                                                                               |               | 9         | 230         | 406        | 48         | 1904       | 1157        | #Paper                                           | Enrichment | BH P-value |
| 23794     | Adams5        | a disintegrin-like and metallopeptidase (reprolysin type) with thrombospondin type 1 motif, 5 (aggrecanase-2) | 2             |           |             |            |            | -1.31      | -1.22       |                                                  |            |            |
| 20525     | Slc2a1        | solute carrier family 2 (facilitated glucose transporter), member 1                                           | 2             |           |             |            |            | -1.23      | -1.22       | 5                                                | 5.5        | 0.01       |
| 74392     | Specc1l       | sperm antigen with calponin homology and coiled-coil domains 1-like                                           | 2             |           |             |            |            | -1.25      | -1.24       |                                                  |            |            |
| 20203     | S100b         | S100 protein, beta polypeptide, neural                                                                        | 2             |           |             |            |            | -1.19      | -1.24       | 1                                                | 1.3        | 0.59       |
| 68545     | Ecsr          | endothelial cell-specific chemotaxis regulator                                                                | 2             |           |             |            |            | -1.41      | -1.24       |                                                  |            |            |
| 68652     | Tab2          | TGF-beta activated kinase 1/MAP3K7 binding protein 2                                                          | 2             |           |             |            |            | -1.20      | -1.24       |                                                  |            |            |
| 245038    | Dclk3         | doublecortin-like kinase 3                                                                                    | 2             |           |             |            |            | -1.27      | -1.25       |                                                  |            |            |
| 100503627 | Gm17238       | predicted gene, 17238                                                                                         | 2             |           |             |            |            | -1.56      | -1.25       |                                                  |            |            |
| 78287     | Zfyve20       | zinc finger, FYVE domain containing 20                                                                        | 2             |           |             |            |            | -1.18      | -1.25       |                                                  |            |            |
| 237339    | L3mbtl3       | l(3)/mbt-like 3 (Drosophila)                                                                                  | 2             |           |             |            |            | -1.51      | -1.25       |                                                  |            |            |
| 67812     | Ubxn4         | UBX domain protein 4                                                                                          | 2             |           |             |            |            | -1.28      | -1.25       |                                                  |            |            |
| 226525    | Rasal2        | RAS protein activator like 2                                                                                  | 2             |           |             |            |            | -1.28      | -1.26       |                                                  |            |            |
| 217692    | Sipa1l1       | signal-induced proliferation-associated 1 like 1                                                              | 2             |           |             |            |            | -1.35      | -1.26       |                                                  |            |            |
| 21873     | Tjp2          | tight junction protein 2                                                                                      | 2             |           |             |            |            | -1.33      | -1.26       | 1                                                | 16.8       | 0.12       |
| 230587    | Glis1         | GLIS family zinc finger 1                                                                                     | 2             |           |             |            |            | -1.34      | -1.26       |                                                  |            |            |
| 76960     | Bcas1         | breast carcinoma amplified sequence 1                                                                         | 2             |           |             |            |            | -1.31      | -1.26       |                                                  |            |            |
| 65962     | Slc9a3r2      | solute carrier family 9 (sodium/hydrogen exchanger), member 3 regulator 2                                     | 2             |           |             |            |            | -1.41      | -1.26       |                                                  |            |            |
| 78689     | Naa35         | N(alpha)-acetyltransferase 35, NatC auxiliary subunit                                                         | 2             |           |             |            |            | -1.29      | -1.27       |                                                  |            |            |
| 77569     | Limch1        | LIM and calponin homology domains 1                                                                           | 2             |           |             |            |            | -1.25      | -1.27       |                                                  |            |            |
| 103511    | Fam26e        | family with sequence similarity 26, member E                                                                  | 2             |           |             |            |            | -1.52      | -1.27       |                                                  |            |            |
| 140721    | Caskin2       | CASK-interacting protein 2                                                                                    | 2             |           |             |            |            | -1.52      | -1.27       |                                                  |            |            |
| 24066     | Spry4         | sprouty homolog 4 (Drosophila)                                                                                | 2             |           |             |            |            | -1.35      | -1.27       |                                                  |            |            |
| 22288     | Utrn          | utrophin                                                                                                      | 2             |           |             |            |            | -1.17      | -1.27       |                                                  |            |            |
| 17828     | Muted         | muted                                                                                                         | 2             |           |             |            |            | -1.41      | -1.27       |                                                  |            |            |
| 72834     | Z810468N07Rik | RIKEN cDNA 2810468N07 gene                                                                                    | 2             |           |             |            |            | -1.37      | -1.28       |                                                  |            |            |
| 72634     | Tdrkh         | tudor and KH domain containing protein                                                                        | 2             |           |             |            |            | -1.26      | -1.28       |                                                  |            |            |
| 260305    | Nphp4         | nephronophthisis 4 (juvenile) homolog (human)                                                                 | 2             |           |             |            |            | -1.38      | -1.28       |                                                  |            |            |
| 17475     | Mpdz          | multiple PDZ domain protein                                                                                   | 2             |           |             |            |            | -1.30      | -1.28       |                                                  |            |            |
| 83453     | Chrdl1        | chordin-like 1                                                                                                | 2             |           |             |            |            | -1.39      | -1.28       |                                                  |            |            |
| 23879     | Fxr2          | fragile X mental retardation, autosomal homolog 2                                                             | 2             |           |             |            |            | -1.26      | -1.28       |                                                  |            |            |
| 72287     | Plekhf1       | pleckstrin homology domain containing, family F (with FYVE domain) member 1                                   | 2             |           |             |            |            | -1.56      | -1.29       |                                                  |            |            |
| 23876     | Fbln5         | fibulin 5                                                                                                     | 2             |           |             |            |            | -1.33      | -1.29       |                                                  |            |            |
| 71529     | Kazn          | kazrin, periaplanin interacting protein                                                                       | 2             |           |             |            |            | -1.43      | -1.29       |                                                  |            |            |
| 50915     | Grb14         | growth factor receptor bound protein 14                                                                       | 2             |           |             |            |            | -1.39      | -1.29       |                                                  |            |            |
| 106369    | Ypel1         | yippee-like 1 (Drosophila)                                                                                    | 2             |           |             |            |            | -1.46      | -1.29       |                                                  |            |            |
| 14164     | Fgf1          | fibroblast growth factor 1                                                                                    | 2             |           |             |            |            | -1.36      | -1.29       |                                                  |            |            |
| 75744     | Svip          | small VCP/p97-interacting protein                                                                             | 2             |           |             |            |            | -1.25      | -1.29       |                                                  |            |            |
| 17532     | Mras          | muscle and microspikes RAS                                                                                    | 2             |           |             |            |            | -1.47      | -1.30       |                                                  |            |            |
| 223649    | Nrbp2         | nuclear receptor binding protein 2                                                                            | 2             |           |             |            |            | -1.34      | -1.30       |                                                  |            |            |
| 13641     | Efnb1         | ephrin B1                                                                                                     | 2             |           |             |            |            | -1.26      | -1.30       |                                                  |            |            |
| 15468     | Prmt2         | protein arginine N-methyltransferase 2                                                                        | 2             |           |             |            |            | -1.38      | -1.30       |                                                  |            |            |
| 59049     | Slc22a17      | solute carrier family 22 (organic cation transporter), member 17                                              | 2             |           |             |            |            | -1.48      | -1.31       |                                                  |            |            |
| 69993     | Chn2          | chimerin (chimaerin) 2                                                                                        | 2             |           |             |            |            | -1.55      | -1.31       |                                                  |            |            |
| 26936     | Mrip          | myosin phosphatase Rho interacting protein                                                                    | 2             |           |             |            |            | -1.48      | -1.31       |                                                  |            |            |
| 73182     | Pear1         | platelet endothelial aggregation receptor 1                                                                   | 2             |           |             |            |            | -1.38      | -1.31       |                                                  |            |            |
| 58178     | Sorcs1        | VPS10 domain receptor protein SORCS 1                                                                         | 2             |           |             |            |            | -1.38      | -1.32       |                                                  |            |            |
| 18797     | Plcb3         | phospholipase C, beta 3                                                                                       | 2             |           |             |            |            | -1.25      | -1.32       |                                                  |            |            |
| 229658    | Vangl1        | vang-like 1 (van gogh, Drosophila)                                                                            | 2             |           |             |            |            | -1.52      | -1.32       |                                                  |            |            |
| 50530     | Mfap5         | microfibrillar associated protein 5                                                                           | 2             |           |             |            |            | -1.52      | -1.32       |                                                  |            |            |
| 22658     | Pcgl2         | polycomb group ring finger 2                                                                                  | 2             |           |             |            |            | -1.42      | -1.33       |                                                  |            |            |
| 64291     | Osbpl1a       | oxysterol binding protein-like 1A                                                                             | 2             |           |             |            |            | -1.33      | -1.33       |                                                  |            |            |
| 94346     | Tmem40        | transmembrane protein 40                                                                                      | 2             |           |             |            |            | -1.62      | -1.33       |                                                  |            |            |
| 70354     | Secisbp2l     | SECIS binding protein 2-like                                                                                  | 2             |           |             |            |            | -1.39      | -1.33       |                                                  |            |            |
| 70461     | Crtc3         | CREB regulated transcription coactivator 3                                                                    | 2             |           |             |            |            | -1.87      | -1.33       |                                                  |            |            |
| 12389     | Cav1          | caveolin 1, caveolae protein                                                                                  | 2             |           |             |            |            | -1.34      | -1.33       | 14                                               | 20.6       | 5.14E-13   |
| 13497     | Drp2          | dystrophin related protein 2                                                                                  | 2             |           |             |            |            | -1.37      | -1.33       |                                                  |            |            |
| 224090    | Tmem44        | transmembrane protein 44                                                                                      | 2             |           |             |            |            | -1.40      | -1.34       |                                                  |            |            |
| 55992     | Trim3         | tripartite motif-containing 3                                                                                 | 2             |           |             |            |            | -1.52      | -1.34       |                                                  |            |            |
| 21802     | Tgfa          | transforming growth factor alpha                                                                              | 2             |           |             |            |            | -1.51      | -1.34       | 11                                               | 2.6        | 0.02       |
| 22051     | Trip6         | thyroid hormone receptor interactor 6                                                                         | 2             |           |             |            |            | -1.56      | -1.34       |                                                  |            |            |
| 79196     | Osbpl5        | oxysterol binding protein-like 5                                                                              | 2             |           |             |            |            | -1.49      | -1.34       |                                                  |            |            |
| 260409    | Cdc42ep3      | CDC42 effector protein (Rho GTPase binding) 3                                                                 | 2             |           |             |            |            | -1.37      | -1.35       |                                                  |            |            |
| 56175     | Bace2         | beta-site APP-cleaving enzyme 2                                                                               | 2             |           |             |            |            | -1.64      | -1.35       |                                                  |            |            |
| 77940     | A930004D18Rik | RIKEN cDNA A930004D18 gene                                                                                    | 2             |           |             |            |            | -1.48      | -1.35       |                                                  |            |            |
| 100380944 | Gm11602       | predicted gene 11602                                                                                          | 2             |           |             |            |            | -1.81      | -1.35       |                                                  |            |            |
| 71184     | I700112M01Rik | RIKEN cDNA 1700112M01 gene                                                                                    | 2             |           |             |            |            | -1.45      | -1.35       |                                                  |            |            |
| 110596    | Rgnef         | Rho-guanine nucleotide exchange factor                                                                        | 2             |           |             |            |            | -1.51      | -1.35       |                                                  |            |            |
| 15248     | Hic1          | hypermethylated in cancer 1                                                                                   | 2             |           |             |            |            | -1.70      | -1.35       |                                                  |            |            |
| 76898     | B3gat1        | beta-1,3-glucuronyltransferase 1 (glucuronosyltransferase P)                                                  | 2             |           |             |            |            | -1.52      | -1.35       |                                                  |            |            |
| 50791     | Magi2         | membrane associated guanylate kinase, WW and PDZ domain containing 2                                          | 2             |           |             |            |            | -1.40      | -1.36       |                                                  |            |            |
| 226751    | Cdc42bpa      | CDC42 binding protein kinase alpha                                                                            | 2             |           |             |            |            | -1.37      | -1.36       |                                                  |            |            |
| 338367    | Myo1d         | myosin ID                                                                                                     | 2             |           |             |            |            | -1.58      | -1.36       |                                                  |            |            |

| Gene ID   | Symbol        | Description                                                                       | DEG/Set count | 2mWT_2mKO | 20mWT_20mKO | 2mKO_20mKO | 2mWT_20mWT | 2mWT_30mWT | 20mWT_30mWT | Literature-Mining (Aging-Cholesterol literature) |            |            |
|-----------|---------------|-----------------------------------------------------------------------------------|---------------|-----------|-------------|------------|------------|------------|-------------|--------------------------------------------------|------------|------------|
|           |               |                                                                                   |               | 9         | 230         | 406        | 48         | 1904       | 1157        | #Paper                                           | Enrichment | BH P-value |
| 21981     | Ppp1r13b      | protein phosphatase 1, regulatory (inhibitor) subunit 13B                         | 2             |           |             |            |            | -1.42      | -1.36       |                                                  |            |            |
| 73852     | D3Erd751e     | DNA segment, Chr 3, ERATO Doi 751, expressed                                      | 2             |           |             |            |            | -1.37      | -1.36       |                                                  |            |            |
| 668253    | Dleu2         | deleted in lymphocytic leukemia, 2                                                | 2             |           |             |            |            | -1.43      | -1.36       |                                                  |            |            |
| 242653    | Cldn19        | claudin 19                                                                        | 2             |           |             |            |            | -1.57      | -1.37       |                                                  |            |            |
| 24050     | Sept3         | septin 3                                                                          | 2             |           |             |            |            | -1.42      | -1.37       |                                                  |            |            |
| 18821     | Pln           | phospholamban                                                                     | 2             |           |             |            |            | -1.64      | -1.37       |                                                  |            |            |
| 16529     | Kcnk5         | potassium channel, subfamily K, member 5                                          | 2             |           |             |            |            | -1.66      | -1.37       |                                                  |            |            |
| 233040    | Fbxo27        | F-box protein 27                                                                  | 2             |           |             |            |            | -1.67      | -1.37       |                                                  |            |            |
| 97761     | Sgsm2         | small G protein signaling modulator 2                                             | 2             |           |             |            |            | -1.37      | -1.37       |                                                  |            |            |
| 71213     | Cage1         | cancer antigen 1                                                                  | 2             |           |             |            |            | -1.53      | -1.38       |                                                  |            |            |
| 26427     | Creb3l1       | cAMP responsive element binding protein 3-like 1                                  | 2             |           |             |            |            | -1.49      | -1.38       |                                                  |            |            |
| 271849    | Shc4          | SHC (Src homology 2 domain containing) family, member 4                           | 2             |           |             |            |            | -1.44      | -1.38       |                                                  |            |            |
| 21833     | Thra          | thyroid hormone receptor alpha                                                    | 2             |           |             |            |            | -1.65      | -1.38       |                                                  |            |            |
| 217310    | C630004H02Rik | RIKEN cDNA C630004H02 gene                                                        | 2             |           |             |            |            | -1.49      | -1.38       |                                                  |            |            |
| 110606    | Fntb          | farnesyltransferase, CAAX box, beta                                               | 2             |           |             |            |            | -1.55      | -1.38       |                                                  |            |            |
| 108800    | Ston2         | stonin 2                                                                          | 2             |           |             |            |            | -1.60      | -1.38       |                                                  |            |            |
| 26968     | Islr          | immunoglobulin superfamily containing leucine-rich repeat                         | 2             |           |             |            |            | -1.38      | -1.39       |                                                  |            |            |
| 18795     | Plcb1         | phospholipase C, beta 1                                                           | 2             |           |             |            |            | -1.35      | -1.39       | 5                                                | 1.3        | 0.65       |
| 70827     | Trak2         | trafficking protein, kinesin binding 2                                            | 2             |           |             |            |            | -1.30      | -1.39       |                                                  |            |            |
| 19272     | Ptprk         | protein tyrosine phosphatase, receptor type, K                                    | 2             |           |             |            |            | -1.43      | -1.39       |                                                  |            |            |
| 64297     | Gprc5b        | G protein-coupled receptor, family C, group 5, member B                           | 2             |           |             |            |            | -1.46      | -1.39       |                                                  |            |            |
| 19088     | Prkar2b       | protein kinase, cAMP dependent regulatory, type II beta                           | 2             |           |             |            |            | -1.36      | -1.40       |                                                  |            |            |
| 94332     | Cadm3         | cell adhesion molecule 3                                                          | 2             |           |             |            |            | -1.57      | -1.40       |                                                  |            |            |
| 241589    | D430041D05Rik | RIKEN cDNA D430041D05 gene                                                        | 2             |           |             |            |            | -1.46      | -1.40       |                                                  |            |            |
| 319899    | Dock6         | dedicator of cytokinesis 6                                                        | 2             |           |             |            |            | -1.44      | -1.40       |                                                  |            |            |
| 11487     | Adam10        | a disintegrin and metallopeptidase domain 10                                      | 2             |           |             |            |            | -1.39      | -1.40       | 5                                                | 44.8       | 1.51E-06   |
| 19126     | Prom1         | prominin 1                                                                        | 2             |           |             |            |            | -1.39      | -1.40       | 1                                                | 3.1        | 0.35       |
| 237759    | Col23a1       | collagen, type XXIII, alpha 1                                                     | 2             |           |             |            |            | -1.68      | -1.41       |                                                  |            |            |
| 234582    | Ccdc102a      | coiled-coil domain containing 102A                                                | 2             |           |             |            |            | -1.78      | -1.41       |                                                  |            |            |
| 58802     | Kcnmb4        | potassium large conductance calcium-activated channel, subfamily M, beta member 4 | 2             |           |             |            |            | -1.99      | -1.41       |                                                  |            |            |
| 329628    | Fat4          | FAT tumor suppressor homolog 4 (Drosophila)                                       | 2             |           |             |            |            | -1.39      | -1.41       |                                                  |            |            |
| 23873     | Faim          | Fas apoptotic inhibitory molecule                                                 | 2             |           |             |            |            | -1.70      | -1.41       |                                                  |            |            |
| 57810     | Cdon          | cell adhesion molecule-related/down-regulated by oncogenes                        | 2             |           |             |            |            | -1.60      | -1.41       |                                                  |            |            |
| 75116     | 4930520O04Rik | RIKEN cDNA 4930520O04 gene                                                        | 2             |           |             |            |            | -1.66      | -1.41       |                                                  |            |            |
| 18605     | Enpp1         | ectonucleotide pyrophosphatase/phosphodiesterase 1                                | 2             |           |             |            |            | -1.63      | -1.42       |                                                  |            |            |
| 269701    | Wdr66         | WD repeat domain 66                                                               | 2             |           |             |            |            | -1.53      | -1.42       |                                                  |            |            |
| 14365     | Fzd3          | frizzled homolog 3 (Drosophila)                                                   | 2             |           |             |            |            | -1.50      | -1.42       |                                                  |            |            |
| 12549     | Arhgap31      | Rho GTPase activating protein 31                                                  | 2             |           |             |            |            | -1.36      | -1.42       |                                                  |            |            |
| 242466    | Zfp462        | zinc finger protein 462                                                           | 2             |           |             |            |            | -1.26      | -1.42       |                                                  |            |            |
| 211429    | Pla2g4b       | phospholipase A2, group IVB (cytosolic)                                           | 2             |           |             |            |            | -1.51      | -1.42       |                                                  |            |            |
| 13665     | Eif2s1        | eukaryotic translation initiation factor 2, subunit 1 alpha                       | 2             |           |             |            |            | -1.64      | -1.42       |                                                  |            |            |
| 436230    | BC065397      | cDNA sequence BC065397                                                            | 2             |           |             |            |            | -1.62      | -1.43       |                                                  |            |            |
| 72469     | Plcd3         | phospholipase C, delta 3                                                          | 2             |           |             |            |            | -1.69      | -1.43       |                                                  |            |            |
| 56788     | Scube2        | signal peptide, CUB domain, EGF-like 2                                            | 2             |           |             |            |            | -2.07      | -1.43       |                                                  |            |            |
| 13824     | Epb4.114a     | erythrocyte protein band 4.1-like 4a                                              | 2             |           |             |            |            | -1.57      | -1.43       |                                                  |            |            |
| 57277     | Slurp1        | secreted Ly6/Plaur domain containing 1                                            | 2             |           |             |            |            | -1.64      | -1.43       | 1                                                | 11.5       | 0.15       |
| 381404    | Pabpc1l       | poly(A) binding protein, cytoplasmic 1-like                                       | 2             |           |             |            |            | -2.02      | -1.43       |                                                  |            |            |
| 76455     | 2310067E19Rik | RIKEN cDNA 2310067E19 gene                                                        | 2             |           |             |            |            | -1.71      | -1.43       |                                                  |            |            |
| 17309     | Mgat3         | mannoside acetylglucosaminyltransferase 3                                         | 2             |           |             |            |            | -1.33      | -1.43       |                                                  |            |            |
| 194309    | Vps37d        | vacuolar protein sorting 37D (yeast)                                              | 2             |           |             |            |            | -1.56      | -1.43       |                                                  |            |            |
| 14199     | Fhl1          | four and a half LIM domains 1                                                     | 2             |           |             |            |            | -1.62      | -1.43       |                                                  |            |            |
| 105445    | Dock9         | dedicator of cytokinesis 9                                                        | 2             |           |             |            |            | -1.43      | -1.44       |                                                  |            |            |
| 67374     | Jam2          | junction adhesion molecule 2                                                      | 2             |           |             |            |            | -1.48      | -1.44       |                                                  |            |            |
| 100503351 | Gm19651       | predicted gene, 19651                                                             | 2             |           |             |            |            | -1.69      | -1.44       |                                                  |            |            |
| 66338     | Cdr4          | CMT1A duplicated region transcript 4                                              | 2             |           |             |            |            | -1.64      | -1.44       |                                                  |            |            |
| 19273     | Ptpru         | protein tyrosine phosphatase, receptor type, U                                    | 2             |           |             |            |            | -1.61      | -1.45       | 1                                                | 2.1        | 0.44       |
| 22420     | Wnt6          | wingless-related MMTV integration site 6                                          | 2             |           |             |            |            | -1.50      | -1.45       |                                                  |            |            |
| 78004     | Prr15         | proline rich 15                                                                   | 2             |           |             |            |            | -1.86      | -1.45       |                                                  |            |            |
| 103012    | 6720401G13Rik | RIKEN cDNA 6720401G13 gene                                                        | 2             |           |             |            |            | -1.62      | -1.45       |                                                  |            |            |
| 217410    | Trib2         | tribbles homolog 2 (Drosophila)                                                   | 2             |           |             |            |            | -1.34      | -1.45       |                                                  |            |            |
| 226143    | Cyp2c44       | cytochrome P450, family 2, subfamily c, polypeptide 44                            | 2             |           |             |            | -1.95      |            | -1.45       |                                                  |            |            |
| 20378     | Frzb          | frizzled-related protein                                                          | 2             |           |             |            |            | -1.36      | -1.45       |                                                  |            |            |
| 109323    | C1qtnf7       | C1q and tumor necrosis factor related protein 7                                   | 2             |           |             |            |            | -1.56      | -1.45       |                                                  |            |            |
| 333088    | Kcp           | kielin/chordin-like protein                                                       | 2             |           |             |            |            | -2.54      | -1.46       |                                                  |            |            |
| 269704    | Zfp664        | zinc finger protein 664                                                           | 2             |           |             |            |            | -1.55      | -1.46       |                                                  |            |            |
| 15426     | Hoxc8         | homeobox C8                                                                       | 2             |           |             |            |            | -1.67      | -1.46       |                                                  |            |            |
| 68525     | Evc2          | Ellis van Creveld syndrome 2 homolog (human)                                      | 2             |           |             |            |            | -1.34      | -1.46       |                                                  |            |            |
| 20377     | Sfrp1         | secreted frizzled-related protein 1                                               | 2             |           |             |            |            | -1.50      | -1.46       |                                                  |            |            |
| 20475     | Six5          | sine oculis-related homeobox 5 homolog (Drosophila)                               | 2             |           |             |            |            | -1.78      | -1.46       |                                                  |            |            |
| 83396     | Glis2         | GLIS family zinc finger 2                                                         | 2             |           |             |            |            | -1.55      | -1.47       |                                                  |            |            |
| 16012     | Igf6          | insulin-like growth factor binding protein 6                                      | 2             |           |             |            |            | -1.56      | -1.47       |                                                  |            |            |
| 12663     | Chml          | choroideremia-like                                                                | 2             |           |             |            |            | -1.51      | -1.47       |                                                  |            |            |

| Gene ID   | Symbol        | Description                                                                                  | DEG/Set count | 2mWT_2mKO | 20mWT_20mKO | 2mKO_20mKO | 2mWT_20mWT | 2mWT_30mWT | 20mWT_30mWT | Literature-Mining (Aging-Cholesterol literature) |            |            |
|-----------|---------------|----------------------------------------------------------------------------------------------|---------------|-----------|-------------|------------|------------|------------|-------------|--------------------------------------------------|------------|------------|
|           |               |                                                                                              |               | 9         | 230         | 406        | 48         | 1904       | 1157        | #Paper                                           | Enrichment | BH P-value |
| 223254    | Farp1         | FERM, RhoGEF (Arhgef) and pleckstrin domain protein 1 (chondrocyte-derived)                  | 2             |           |             |            |            | -1.49      | -1.47       |                                                  |            |            |
| 19249     | Ptpn13        | protein tyrosine phosphatase, non-receptor type 13                                           | 2             |           |             |            |            | -1.29      | -1.47       |                                                  |            |            |
| 18671     | Abcb1a        | ATP-binding cassette, sub-family B (MDR/TAP), member 1A                                      | 2             |           |             |            |            | -1.36      | -1.48       | 1                                                | 0.5        | 1.02       |
| 18004     | Nek1          | NIMA (never in mitosis gene a)-related expressed kinase 1                                    | 2             |           |             |            |            | -1.52      | -1.48       |                                                  |            |            |
| 17936     | Nab1          | Ngfi-A binding protein 1                                                                     | 2             |           |             |            |            | -1.37      | -1.48       |                                                  |            |            |
| 214742    | Rcor3         | REST corepressor 3                                                                           | 2             |           |             |            |            | -1.52      | -1.48       |                                                  |            |            |
| 66259     | Camk2n1       | calcium/calmodulin-dependent protein kinase II inhibitor 1                                   | 2             |           |             |            |            | -1.42      | -1.48       | 1                                                | 7.2        | 0.20       |
| 68481     | Mpz1          | myelin protein zero-like 1                                                                   | 2             |           |             |            |            | -1.53      | -1.48       |                                                  |            |            |
| 320635    | Cyb5r2        | cytochrome b5 reductase 2                                                                    | 2             |           |             |            |            | -1.61      | -1.49       |                                                  |            |            |
| 72289     | Malat1        | metastasis associated lung adenocarcinoma transcript 1 (non-coding RNA)                      | 2             |           |             |            |            | -1.44      | -1.49       |                                                  |            |            |
| 72350     | Fam164c       | family with sequence similarity 164, member C                                                | 2             |           |             |            |            | -1.69      | -1.49       |                                                  |            |            |
| 68178     | Cgnl1         | cingulin-like 1                                                                              | 2             |           |             |            |            | -1.29      | -1.49       |                                                  |            |            |
| 320965    | 4831440E17Rik | RIKEN cDNA 4831440E17 gene                                                                   | 2             |           |             |            |            | -2.06      | -1.49       |                                                  |            |            |
| 13838     | Epha4         | Eph receptor A4                                                                              | 2             |           |             |            |            | -1.94      | -1.49       |                                                  |            |            |
| 668303    | Kif26a        | kinesin family member 26A                                                                    | 2             |           |             |            |            | -1.53      | -1.50       |                                                  |            |            |
| 232237    | Fgd5          | FYVE, RhoGEF and PH domain containing 5                                                      | 2             |           |             |            |            | -1.68      | -1.50       |                                                  |            |            |
| 20501     | Slc16a1       | solute carrier family 16 (monocarboxylic acid transporters), member 1                        | 2             |           |             |            |            | -1.67      | -1.50       |                                                  |            |            |
| 14609     | Gja1          | gap junction protein, alpha 1                                                                | 2             |           |             |            |            | -1.46      | -1.50       | 1                                                | 1          | 1.04       |
| 192897    | Itgb4         | integrin beta 4                                                                              | 2             |           |             |            |            | -1.46      | -1.51       |                                                  |            |            |
| 16886     | Limk2         | LIM motif-containing protein kinase 2                                                        | 2             |           |             |            |            | -1.67      | -1.51       |                                                  |            |            |
| 109594    | Lmo1          | LIM domain only 1                                                                            | 2             |           |             |            |            | -1.51      | -1.51       |                                                  |            |            |
| 243382    | Ppm1k         | protein phosphatase 1K (PP2C domain containing)                                              | 2             |           |             |            |            | -1.54      | -1.51       |                                                  |            |            |
| 77794     | Adamts12      | ADAMTS-like 2                                                                                | 2             |           |             |            |            | -2.03      | -1.51       |                                                  |            |            |
| 654818    | C030030A07Rik | RIKEN cDNA C030030A07 gene                                                                   | 2             |           |             |            |            | -1.62      | -1.51       |                                                  |            |            |
| 18552     | Pcsk5         | proprotein convertase subtilisin/kexin type 5                                                | 2             |           |             |            |            | -1.91      | -1.51       |                                                  |            |            |
| 216795    | Wnt9a         | wingless-type MMTV integration site 9A                                                       | 2             |           |             |            |            | -1.73      | -1.52       |                                                  |            |            |
| 78892     | Crispld2      | cysteine-rich secretory protein LCCL domain containing 2                                     | 2             |           |             |            |            | -1.95      | -1.52       |                                                  |            |            |
| 74011     | Slc25a27      | solute carrier family 25, member 27                                                          | 2             |           |             |            |            | -1.46      | -1.52       |                                                  |            |            |
| 20732     | Spint1        | serine protease inhibitor, Kunitz type 1                                                     | 2             |           |             |            |            | -1.93      | -1.52       |                                                  |            |            |
| 239114    | Il17d         | interleukin 17D                                                                              | 2             |           |             |            |            | -1.96      | -1.52       |                                                  |            |            |
| 381110    | Fam82a1       | family with sequence similarity 82, member A1                                                | 2             |           |             |            |            | -1.31      | -1.53       |                                                  |            |            |
| 192167    | Nlgn1         | neuroligin 1                                                                                 | 2             |           |             |            |            | -1.97      | -1.54       |                                                  |            |            |
| 70737     | Cgn           | cingulin                                                                                     | 2             |           |             |            |            | -1.84      | -1.54       |                                                  |            |            |
| 230316    | Megf9         | multiple EGF-like-domains 9                                                                  | 2             |           |             |            |            | -1.41      | -1.54       |                                                  |            |            |
| 12724     | Clcn2         | chloride channel 2                                                                           | 2             |           |             |            |            | -1.83      | -1.54       |                                                  |            |            |
| 68939     | Ras11b        | RAS-like, family 11, member B                                                                | 2             |           |             |            |            | -1.82      | -1.54       |                                                  |            |            |
| 50905     | Il17rb        | interleukin 17 receptor B                                                                    | 2             |           |             |            |            | -1.81      | -1.54       |                                                  |            |            |
| 214137    | Arhgap29      | Rho GTPase activating protein 29                                                             | 2             |           |             |            |            | -1.41      | -1.54       |                                                  |            |            |
| 280668    | Adam1a        | a disintegrin and metalloproteinase domain 1a                                                | 2             |           |             |            |            | -1.45      | -1.55       |                                                  |            |            |
| 21809     | Tgfb3         | transforming growth factor, beta 3                                                           | 2             |           |             |            |            | -1.46      | -1.55       |                                                  |            |            |
| 12395     | Runx1t1       | runt-related transcription factor 1; translocated to, 1 (cyclin D-related)                   | 2             |           |             |            |            | -1.46      | -1.55       |                                                  |            |            |
| 327958    | Pitpnm3       | PITPNM family member 3                                                                       | 2             |           |             |            |            | -1.44      | -1.55       |                                                  |            |            |
| 73490     | Mipol1        | mirror-image polydactyly gene 1 homolog (human)                                              | 2             |           |             |            |            | -1.39      | -1.55       |                                                  |            |            |
| 207259    | Zbtb7c        | zinc finger and BTB domain containing 7C                                                     | 2             |           |             |            |            | -1.59      | -1.56       |                                                  |            |            |
| 56089     | Ramp3         | receptor (calcitonin) activity modifying protein 3                                           | 2             |           |             |            |            | -2.09      | -1.56       |                                                  |            |            |
| 15465     | Hrh1          | histamine receptor H1                                                                        | 2             |           |             |            |            | -1.53      | -1.56       |                                                  |            |            |
| 69219     | Ddah1         | dimethylarginine dimethylaminohydrolase 1                                                    | 2             |           |             |            |            | -1.84      | -1.56       | 1                                                | 15.4       | 0.13       |
| 23955     | Nek4          | NIMA (never in mitosis gene a)-related expressed kinase 4                                    | 2             |           |             |            |            | -1.37      | -1.57       |                                                  |            |            |
| 268759    | 9930012K11Rik | RIKEN cDNA 9930012K11 gene                                                                   | 2             |           |             |            |            | -1.87      | -1.57       |                                                  |            |            |
| 54612     | Sfrp5         | secreted frizzled-related sequence protein 5                                                 | 2             |           |             |            |            | -1.44      | -1.57       |                                                  |            |            |
| 319832    | Tmem229a      | transmembrane protein 229A                                                                   | 2             |           |             |            |            | -1.60      | -1.57       |                                                  |            |            |
| 97114     | Hist2h3c2-ps  | histone cluster 2, H3c2, pseudogene                                                          | 2             |           |             |            |            | -1.77      | -1.57       |                                                  |            |            |
| 67434     | Ankrd33b      | ankyrin repeat domain 33B                                                                    | 2             |           |             |            |            | -1.59      | -1.57       |                                                  |            |            |
| 54446     | Nfat5         | nuclear factor of activated T-cells 5                                                        | 2             |           |             |            |            | -1.49      | -1.58       |                                                  |            |            |
| 11551     | Adra2a        | adrenergic receptor, alpha 2a                                                                | 2             |           |             |            |            | -2.08      | -1.58       |                                                  |            |            |
| 53881     | Slc5a3        | solute carrier family 5 (inositol transporters), member 3                                    | 2             |           |             |            |            | -1.37      | -1.59       |                                                  |            |            |
| 117606    | Boc           | biregional cell adhesion molecule-related/down-regulated by oncogenes (Cdon) binding protein | 2             |           |             |            |            | -1.57      | -1.60       |                                                  |            |            |
| 76640     | 1700113H08Rik | RIKEN cDNA 1700113H08 gene                                                                   | 2             |           |             |            |            | -1.97      | -1.60       |                                                  |            |            |
| 18511     | Pax9          | paired box gene 9                                                                            | 2             |           |             |            |            | -1.82      | -1.60       |                                                  |            |            |
| 70784     | Ras112        | RAS-like, family 12                                                                          | 2             |           |             |            |            | -1.85      | -1.60       |                                                  |            |            |
| 100042480 | Nhsl2         | NHS-like 2                                                                                   | 2             |           |             |            |            | -1.34      | -1.60       |                                                  |            |            |
| 14178     | Fgf7          | fibroblast growth factor 7                                                                   | 2             |           |             |            |            | -1.34      | -1.60       |                                                  |            |            |
| 17301     | Foxd2         | forkhead box D2                                                                              | 2             |           |             |            |            | -1.54      | -1.61       |                                                  |            |            |
| 100504377 | Gm20199       | predicted gene, 20199                                                                        | 2             |           |             |            |            | -1.59      | -1.61       |                                                  |            |            |
| 75906     | Fam184a       | family with sequence similarity 184, member A                                                | 2             |           |             |            |            | -1.46      | -1.61       |                                                  |            |            |
| 16475     | Jub           | ajuba                                                                                        | 2             |           |             |            |            | -1.95      | -1.61       |                                                  |            |            |
| 12654     | Chi3l1        | chitinase 3-like 1                                                                           | 2             |           |             |            |            | -1.62      | -1.61       |                                                  |            |            |
| 58237     | Nkain4        | Na+/K+ transporting ATPase interacting 4                                                     | 2             |           |             |            |            | -1.54      | -1.62       |                                                  |            |            |
| 16764     | Aff3          | AF4/FMR2 family, member 3                                                                    | 2             |           |             |            |            | -1.37      | -1.62       |                                                  |            |            |
| 223864    | Rapgef3       | Rap guanine nucleotide exchange factor (GEF) 3                                               | 2             |           |             |            |            | -1.51      | -1.62       |                                                  |            |            |

| Gene ID   | Symbol        | Description                                                                             | DEG/Set count | 2mWT_2mKO | 20mWT_20mKO | 2mKO_20mKO | 2mWT_20mWT | 2mWT_30mWT | 20mWT_30mWT | Literature-Mining (Aging-Cholesterol literature) |            |            |
|-----------|---------------|-----------------------------------------------------------------------------------------|---------------|-----------|-------------|------------|------------|------------|-------------|--------------------------------------------------|------------|------------|
|           |               |                                                                                         |               | 9         | 230         | 406        | 48         | 1904       | 1157        | #Paper                                           | Enrichment | BH P-value |
| 100039684 | 5031434O11Rik | RIKEN cDNA 5031434O11 gene                                                              | 2             |           |             |            |            |            |             |                                                  |            |            |
| 108760    | Galnt1        | UDP-N-acetyl-alpha-D-galactosamine:polypeptide N-acetylgalactosaminyltransferase-like 1 | 2             |           |             |            |            | -1.87      | -1.62       |                                                  |            |            |
| 212391    | Lcor          | ligand dependent nuclear receptor corepressor                                           | 2             |           |             |            |            | -1.63      | -1.63       |                                                  |            |            |
| 78102     | 8430426J06Rik | RIKEN cDNA 8430426J06 gene                                                              | 2             |           |             |            |            | -1.95      | -1.63       |                                                  |            |            |
| 74782     | Gli8d2        | glycosyltransferase 8 domain containing 2                                               | 2             |           |             |            |            | -1.94      | -1.63       |                                                  |            |            |
| 100039795 | Ildr2         | immunoglobulin-like domain containing receptor 2                                        | 2             |           |             |            |            | -1.48      | -1.63       |                                                  |            |            |
| 209645    | Bend7         | BEN domain containing 7                                                                 | 2             |           |             |            |            | -2.19      | -1.64       |                                                  |            |            |
| 233274    | Siglech       | sialic acid binding Ig-like lectin H                                                    | 2             |           |             |            |            | -1.93      | -1.64       |                                                  |            |            |
| 12824     | Col2a1        | collagen, type II, alpha 1                                                              | 2             |           |             |            |            | -1.79      | -1.64       |                                                  |            |            |
| 114142    | Foxp2         | forkhead box P2                                                                         | 2             |           |             |            |            | -1.55      | -1.64       |                                                  |            |            |
| 68235     | 2410066E13Rik | RIKEN cDNA 2410066E13 gene                                                              | 2             |           |             |            |            | -1.46      | -1.64       |                                                  |            |            |
| 114249    | Npnt          | nephronectin                                                                            | 2             |           |             |            |            | -1.82      | -1.65       |                                                  |            |            |
| 12160     | Bmp5          | bone morphogenetic protein 5                                                            | 2             |           |             |            |            | -1.74      | -1.66       |                                                  |            |            |
| 17965     | Nbl1          | neuroblastoma, suppression of tumorigenicity 1                                          | 2             |           |             |            |            | -1.56      | -1.66       |                                                  |            |            |
| 22351     | Vill          | villin-like                                                                             | 2             |           |             |            |            | -1.71      | -1.66       |                                                  |            |            |
| 63830     | Kcnq1ot1      | KCNQ1 overlapping transcript 1                                                          | 2             |           |             |            |            | -1.87      | -1.67       |                                                  |            |            |
| 16456     | F11r          | F11 receptor                                                                            | 2             |           |             |            |            | -1.59      | -1.67       | 3                                                | 26.9       | 1.43E-03   |
| 106522    | Pkdcc         | protein kinase domain containing, cytoplasmic                                           | 2             |           |             |            |            | -1.77      | -1.67       |                                                  |            |            |
| 100504686 | Sfpq          | NA                                                                                      | 2             |           |             |            |            | -1.62      | -1.67       |                                                  |            |            |
| 16526     | Kcnk2         | potassium channel, subfamily K, member 2                                                | 2             |           |             |            |            | -1.58      | -1.67       |                                                  |            |            |
| 241638    | Prosapip1     | ProSAPIP1 protein                                                                       | 2             |           |             |            |            | -1.85      | -1.68       |                                                  |            |            |
| 17057     | Kirb1a        | killer cell lectin-like receptor subfamily B member 1A                                  | 2             |           |             |            |            | -1.91      | -1.68       |                                                  |            |            |
| 268860    | Abat          | 4-aminobutyrate aminotransferase                                                        | 2             |           |             |            |            | -1.53      | -1.68       |                                                  |            |            |
| 237761    | Ankrd43       | ankyrin repeat domain 43                                                                | 2             |           |             |            |            | -1.63      | -1.69       |                                                  |            |            |
| 68144     | 5031426D15Rik | RIKEN cDNA 5031426D15 gene                                                              | 2             |           |             |            |            | -1.66      | -1.69       |                                                  |            |            |
| 320311    | Rnf152        | ring finger protein 152                                                                 | 2             |           |             |            |            | -1.74      | -1.70       |                                                  |            |            |
| 14200     | Fhl2          | four and a half LIM domains 2                                                           | 2             |           |             |            |            | -1.64      | -1.71       |                                                  |            |            |
| 14632     | Gli1          | GLI-Kruppel family member GLI1                                                          | 2             |           |             |            |            | -1.68      | -1.71       |                                                  |            |            |
| 12829     | Col4a4        | collagen, type IV, alpha 4                                                              | 2             |           |             |            |            | -2.01      | -1.71       |                                                  |            |            |
| 66790     | Grtp1         | GH regulated TBC protein 1                                                              | 2             |           |             |            |            | -1.97      | -1.72       |                                                  |            |            |
| 107587    | Osr2          | odd-skipped related 2 (Drosophila)                                                      | 2             |           |             |            |            | -1.84      | -1.73       |                                                  |            |            |
| 93842     | Igsf9         | immunoglobulin superfamily, member 9                                                    | 2             |           |             |            |            | -2.35      | -1.73       |                                                  |            |            |
| 242509    | Bnc2          | basonuclin 2                                                                            | 2             |           |             |            |            | -1.65      | -1.73       |                                                  |            |            |
| 60596     | Gucy1a3       | guanylate cyclase 1, soluble, alpha 3                                                   | 2             |           |             |            |            | -1.90      | -1.73       |                                                  |            |            |
| 109978    | Art4          | ADP-ribosyltransferase 4                                                                | 2             |           |             |            |            | -2.28      | -1.73       |                                                  |            |            |
| 240332    | Slc6a7        | solute carrier family 6 (neurotransmitter transporter, L-proline), member 7             | 2             |           |             |            |            | -1.94      | -1.73       |                                                  |            |            |
| 73296     | Rhobtb3       | Rho-related BTB domain containing 3                                                     | 2             |           |             |            |            | -1.78      | -1.74       |                                                  |            |            |
| 269959    | Adamts13      | ADAMTS-like 3                                                                           | 2             |           |             |            |            | -1.65      | -1.74       |                                                  |            |            |
| 74134     | Cyp2s1        | cytochrome P450, family 2, subfamily s, polypeptide 1                                   | 2             |           |             |            |            | -2.18      | -1.74       |                                                  |            |            |
| 13052     | Cxadr         | coxsackie virus and adenovirus receptor                                                 | 2             |           |             |            |            | -1.48      | -1.74       | 1                                                | 5.1        | 0.25       |
| 100502711 | NA            | NA                                                                                      | 2             |           |             |            |            | -1.59      | -1.74       |                                                  |            |            |
| 13386     | Dlk1          | delta-like 1 homolog (Drosophila)                                                       | 2             |           |             |            |            | -2.77      | -1.74       |                                                  |            |            |
| 12737     | Cldn1         | claudin 1                                                                               | 2             |           |             |            |            | -1.65      | -1.75       |                                                  |            |            |
| 106042    | Prickle1      | prickle homolog 1 (Drosophila)                                                          | 2             |           |             |            |            | -1.70      | -1.75       |                                                  |            |            |
| 70598     | Filip1        | filamin A interacting protein 1                                                         | 2             |           |             |            |            | -1.70      | -1.75       |                                                  |            |            |
| 20518     | Slc22a2       | solute carrier family 22 (organic cation transporter), member 2                         | 2             |           |             |            |            | -2.23      | -1.75       |                                                  |            |            |
| 333182    | Cox6b2        | cytochrome c oxidase subunit VIb polypeptide 2                                          | 2             |           |             |            |            | -2.18      | -1.76       |                                                  |            |            |
| 320916    | Wscd2         | WSC domain containing 2                                                                 | 2             |           |             |            |            | -1.84      | -1.77       |                                                  |            |            |
| 17286     | Meox2         | mesenchyme homeobox 2                                                                   | 2             |           |             |            |            | -1.91      | -1.78       |                                                  |            |            |
| 21828     | Thbs4         | thrombospondin 4                                                                        | 2             |           |             |            |            | -1.72      | -1.78       |                                                  |            |            |
| 76365     | Tbx18         | T-box18                                                                                 | 2             |           |             |            |            | -1.81      | -1.78       |                                                  |            |            |
| 14412     | Slc6a13       | solute carrier family 6 (neurotransmitter transporter, GABA), member 13                 | 2             |           |             |            |            | -1.57      | -1.79       |                                                  |            |            |
| 320415    | Gchfr         | GTP cyclohydrolase I feedback regulator                                                 | 2             |           |             |            |            | -2.83      | -1.79       |                                                  |            |            |
| 23964     | Odz2          | odd Oz/ten-m homolog 2 (Drosophila)                                                     | 2             |           |             |            |            | -1.92      | -1.80       |                                                  |            |            |
| 60345     | Nrip2         | nuclear receptor interacting protein 2                                                  | 2             |           |             |            |            | -1.85      | -1.80       |                                                  |            |            |
| 77132     | 2810433D01Rik | RIKEN cDNA 2810433D01 gene                                                              | 2             |           |             |            |            | -2.03      | -1.81       |                                                  |            |            |
| 108096    | Slco1a5       | solute carrier organic anion transporter family, member 1a5                             | 2             |           |             |            |            | -2.53      | -1.81       |                                                  |            |            |
| 12224     | Klf5          | Kruppel-like factor 5                                                                   | 2             |           |             |            |            | -1.72      | -1.83       |                                                  |            |            |
| 57265     | Fzd2          | frizzled homolog 2 (Drosophila)                                                         | 2             |           |             |            |            | -1.71      | -1.83       |                                                  |            |            |
| 69239     | 2610034M16Rik | RIKEN cDNA 2610034M16 gene                                                              | 2             |           |             |            |            | -1.67      | -1.84       |                                                  |            |            |
| 100043364 | Gm4392        | predicted gene 4392                                                                     | 2             |           |             |            |            | -1.62      | -1.84       |                                                  |            |            |
| 78303     | Hist3h2ba     | histone cluster 3, H2ba                                                                 | 2             |           |             |            |            | -2.05      | -1.84       |                                                  |            |            |
| 67198     | Spats2l       | spermatogenesis associated, serine-rich 2-like                                          | 2             |           |             |            |            | -2.01      | -1.85       |                                                  |            |            |
| 71951     | Gpc2          | glypican 2 (cerebroglycan)                                                              | 2             |           |             |            |            | -1.57      | -1.86       |                                                  |            |            |
| 108105    | B3gnt5        | UDP-GlcNAc:betaGal beta-1,3-N-acetylglucosaminyltransferase 5                           | 2             |           |             |            | 1.65       |            | -1.86       |                                                  |            |            |
| 319819    | 4932435O22Rik | RIKEN cDNA 4932435O22 gene                                                              | 2             |           |             |            |            | -1.51      | -1.87       |                                                  |            |            |
| 228413    | Prrg4         | proline rich Gla (G-carboxylglutamic acid) 4 (transmembrane)                            | 2             |           |             |            |            | -1.86      | -1.87       |                                                  |            |            |
| 100503921 | Gm19966       | predicted gene, 19966                                                                   | 2             |           |             |            |            | -2.36      | -1.87       |                                                  |            |            |
| 23888     | Gpc6          | glypican 6                                                                              | 2             |           |             |            |            | -1.97      | -1.88       |                                                  |            |            |
| 14012     | Mpzl2         | myelin protein zero-like 2                                                              | 2             |           |             |            |            | -1.79      | -1.89       |                                                  |            |            |
| 330096    | Shisa3        | shisa homolog 3 (Xenopus laevis)                                                        | 2             |           |             |            |            | -1.65      | -1.90       |                                                  |            |            |
| 216033    | Ctnna3        | catenin (cadherin associated protein), alpha 3                                          | 2             |           |             |            |            | -1.76      | -1.90       |                                                  |            |            |
| 22284     | Usp9x         | ubiquitin specific peptidase 9, X chromosome                                            | 2             |           |             |            | 1.39       |            | -1.90       |                                                  |            |            |

| Gene ID   | Symbol        | Description                                                                            | DEG/Set count | 2mWT_2mKO | 20mWT_20mKO | 2mKO_20mKO | 2mWT_20mWT | 2mWT_30mWT | 20mWT_30mWT | Literature-Mining (Aging-Cholesterol literature) |            |            |
|-----------|---------------|----------------------------------------------------------------------------------------|---------------|-----------|-------------|------------|------------|------------|-------------|--------------------------------------------------|------------|------------|
|           |               |                                                                                        |               | 9         | 230         | 406        | 48         | 1904       | 1157        | #Paper                                           | Enrichment | BH P-value |
| 64058     | Perp          | PERP, TP53 apoptosis effector                                                          | 2             |           |             |            |            | -1.95      | -1.91       |                                                  |            |            |
| 57738     | Slc15a2       | solute carrier family 15 (H+/peptide transporter), member 2                            | 2             |           |             |            |            | -2.37      | -1.92       |                                                  |            |            |
| 330166    | Miat          | myocardial infarction associated transcript (non-protein coding)                       | 2             |           |             |            |            | -2.00      | -1.93       |                                                  |            |            |
| 24059     | Slco2a1       | solute carrier organic anion transporter family, member 2a1                            | 2             |           |             |            |            | -1.81      | -1.95       |                                                  |            |            |
| 78267     | Kihdc8b       | kelch domain containing 8B                                                             | 2             |           |             |            |            | -2.26      | -1.95       |                                                  |            |            |
| 68625     | Wdr65         | WD repeat domain 65                                                                    | 2             |           |             |            |            | -1.83      | -1.96       |                                                  |            |            |
| 209195    | Clic6         | chloride intracellular channel 6                                                       | 2             |           |             |            |            | -1.69      | -1.96       |                                                  |            |            |
| 15229     | Foxd1         | forkhead box D1                                                                        | 2             |           |             |            |            | -1.73      | -1.96       |                                                  |            |            |
| 13884     | Ces1c         | carboxylesterase 1C                                                                    | 2             |           |             |            |            | -2.33      | -1.97       |                                                  |            |            |
| 69772     | Bdh2          | 3-hydroxybutyrate dehydrogenase, type 2                                                | 2             |           |             |            |            | -2.40      | -1.98       |                                                  |            |            |
| 64074     | Smoc2         | SPARC related modular calcium binding 2                                                | 2             |           |             |            |            | -2.06      | -1.98       |                                                  |            |            |
| 74186     | Ccdc3         | coiled-coil domain containing 3                                                        | 2             |           |             |            |            | -1.95      | -1.99       |                                                  |            |            |
| 16612     | Klk1          | kallikrein 1                                                                           | 2             |           |             |            |            | -2.02      | -2.00       |                                                  |            |            |
| 223272    | Iitgb1        | integrin, beta-like 1                                                                  | 2             |           |             |            |            | -2.18      | -2.00       |                                                  |            |            |
| 55987     | Cpxm2         | carboxypeptidase X 2 (M14 family)                                                      | 2             |           |             |            |            | -1.81      | -2.00       |                                                  |            |            |
| 66859     | Slc16a9       | solute carrier family 16 (monocarboxylic acid transporters), member 9                  | 2             |           |             |            |            | -1.86      | -2.03       |                                                  |            |            |
| 320856    | Ppp1r12b      | NA                                                                                     | 2             |           |             |            |            | -2.52      | -2.05       |                                                  |            |            |
| 16763     | Lad1          | ladinin                                                                                | 2             |           |             |            |            | -2.52      | -2.07       |                                                  |            |            |
| 224833    | Al661453      | expressed sequence Al661453                                                            | 2             |           |             |            |            | -2.10      | -2.09       |                                                  |            |            |
| 100040792 | Gm11627       | predicted gene 11627                                                                   | 2             |           |             |            |            | -2.06      | -2.09       |                                                  |            |            |
| 654812    | Angptl7       | angiopoietin-like 7                                                                    | 2             |           |             |            |            | -2.24      | -2.09       |                                                  |            |            |
| 20519     | Slc22a3       | solute carrier family 22 (organic cation transporter), member 3                        | 2             |           |             |            |            | -2.22      | -2.09       |                                                  |            |            |
| 56047     | Msln          | mesothelin                                                                             | 2             |           |             |            |            | -1.95      | -2.10       |                                                  |            |            |
| 14275     | Folr1         | folate receptor 1 (adult)                                                              | 2             |           |             |            |            | -1.64      | -2.11       |                                                  |            |            |
| 74103     | Neb1          | nebulette                                                                              | 2             |           |             |            | 1.88       |            | -2.17       |                                                  |            |            |
| 100504147 | LOC100504147  | NA                                                                                     | 2             |           |             |            |            | -2.10      | -2.17       |                                                  |            |            |
| 16782     | Lamc2         | laminin, gamma 2                                                                       | 2             |           |             |            |            | -2.40      | -2.18       | 2                                                | 3          | 0.22       |
| 12373     | Casq2         | calsequestrin 2                                                                        | 2             |           |             |            |            | -2.29      | -2.21       |                                                  |            |            |
| 14264     | Fmod          | fibromodulin                                                                           | 2             |           |             |            |            | -2.82      | -2.29       |                                                  |            |            |
| 319626    | 9530059O14Rik | RIKEN cDNA 9530059O14 gene                                                             | 2             |           |             |            |            | -1.82      | -2.31       |                                                  |            |            |
| 192199    | Rspo1         | R-spondin homolog (Xenopus laevis)                                                     | 2             |           |             |            |            | -2.57      | -2.35       |                                                  |            |            |
| 108151    | Sema3d        | sema domain, immunoglobulin domain (Ig), short basic domain, secreted, (semaphorin) 3D | 2             |           |             |            |            | -2.22      | -2.36       |                                                  |            |            |
| 16780     | Lamb3         | laminin, beta 3                                                                        | 2             |           |             |            |            | -2.38      | -2.36       |                                                  |            |            |
| 18784     | Pla2g5        | phospholipase A2, group V                                                              | 2             |           |             |            |            | -2.16      | -2.36       |                                                  |            |            |
| 14411     | Slc6a12       | solute carrier family 6 (neurotransmitter transporter, betaine/GABA), member 12        | 2             |           |             |            |            | -2.52      | -2.37       |                                                  |            |            |
| 399558    | Flrt2         | fibronectin leucine rich transmembrane protein 2                                       | 2             |           |             |            |            | -2.02      | -2.38       |                                                  |            |            |
| 75677     | Cldn22        | claudin 22                                                                             | 2             |           |             |            |            | -2.91      | -2.40       |                                                  |            |            |
| 338403    | Cndp1         | carnosine dipeptidase 1 (metallopeptidase M20 family)                                  | 2             |           |             |            |            | -2.89      | -2.41       |                                                  |            |            |
| 70008     | Ace2          | angiotensin I converting enzyme (peptidyl-dipeptidase A) 2                             | 2             |           |             |            |            | -3.80      | -2.49       |                                                  |            |            |
| 16425     | Itih2         | inter-alpha trypsin inhibitor, heavy chain 2                                           | 2             |           |             |            |            | -2.88      | -2.52       |                                                  |            |            |
| 99681     | Tchh          | trichohyalin                                                                           | 2             |           |             |            |            | -2.46      | -2.55       |                                                  |            |            |
| 71664     | Mettl7b       | methyltransferase like 7B                                                              | 2             |           |             |            |            | -2.85      | -2.60       |                                                  |            |            |
| 68311     | Lypd2         | Ly6/Plaur domain containing 2                                                          | 2             |           |             |            |            | -3.77      | -2.91       |                                                  |            |            |
| 16669     | Krt19         | keratin 19                                                                             | 2             |           |             |            |            | -3.20      | -3.07       |                                                  |            |            |
| 54156     | Egfl6         | EGF-like-domain, multiple 6                                                            | 2             |           |             |            |            | -4.95      | -3.22       |                                                  |            |            |
| 74071     | Ifitd1        | intermediate filament tail domain containing 1                                         | 2             |           |             |            |            | -3.38      | -3.24       |                                                  |            |            |
| 13643     | Efnb3         | ephrin B3                                                                              | 2             |           |             |            |            | -4.71      | -3.69       |                                                  |            |            |
| 665033    | Col6a5        | collagen, type VI, alpha 5                                                             | 2             |           |             |            |            | -5.42      | -3.79       |                                                  |            |            |
| 20186     | Nr1h4         | nuclear receptor subfamily 1, group H, member 4                                        | 2             |           | 1.50        |            |            | 2.16       |             | 5                                                | 23.3       | 3.01E-05   |
| 58807     | Slco1c1       | solute carrier organic anion transporter family, member 1c1                            | 2             |           | -1.54       |            |            | 1.73       |             |                                                  |            |            |
| 56857     | Slc37a2       | solute carrier family 37 (glycerol-3-phosphate transporter), member 2                  | 2             |           | 1.41        |            |            | 2.49       |             |                                                  |            |            |
| 65221     | Slc15a3       | solute carrier family 15, member 3                                                     | 2             |           | 1.72        |            |            | 4.82       |             |                                                  |            |            |
| 93880     | Pcdhb9        | protocadherin beta 9                                                                   | 2             |           |             |            | 1.97       | 2.93       |             |                                                  |            |            |
| 17916     | Myo1f         | myosin IF                                                                              | 2             |           | 1.94        |            |            | 3.35       |             |                                                  |            |            |
| 214944    | Mob3b         | MOB kinase activator 3B                                                                | 2             |           | 1.35        |            |            | -1.56      |             |                                                  |            |            |
| 319387    | Lphn3         | latrophilin 3                                                                          | 2             | 1.88      |             |            |            | 1.73       |             |                                                  |            |            |
| 16792     | Laptn5        | lysosomal-associated protein transmembrane 5                                           | 2             |           | 1.48        |            |            | 3.39       |             |                                                  |            |            |
| 319765    | Igf2bp2       | insulin-like growth factor 2 mRNA binding protein 2                                    | 2             |           |             |            | -1.47      | -1.52      |             |                                                  |            |            |
| 100503148 | Gm19575       | NA                                                                                     | 2             |           |             |            |            | -1.57      | -2.03       |                                                  |            |            |
| 338521    | Fa2h          | fatty acid 2-hydroxylase                                                               | 2             |           |             |            |            | -1.32      | -1.41       |                                                  |            |            |
| 56405     | Dusp14        | dual specificity phosphatase 14                                                        | 2             |           | -1.58       |            |            |            | -1.52       |                                                  |            |            |
| 12903     | Crabp1        | cellular retinoic acid binding protein I                                               | 2             | -2.23     | -2.60       |            |            |            |             |                                                  |            |            |
| 12834     | Col6a2        | collagen, type VI, alpha 2                                                             | 2             |           |             |            |            | -1.69      | -2.14       |                                                  |            |            |
| 19378     | Aldh1a2       | aldehyde dehydrogenase family 1, subfamily A2                                          | 2             |           | -2.26       |            |            |            | 2.50        |                                                  |            |            |
| 109934    | Abr           | active BCR-related gene                                                                | 2             |           |             |            | 1.53       | 1.65       |             |                                                  |            |            |
| 100503029 | NA            | NA                                                                                     | 2             |           | 1.40        |            |            | -1.77      |             |                                                  |            |            |
| 20201     | S100a8        | S100 calcium binding protein A8 (calgranulin A)                                        | 1             |           |             | 9.40       |            |            |             |                                                  |            |            |
| 624219    | Gm6484        | predicted gene 6484                                                                    | 1             |           |             | 8.97       |            |            |             |                                                  |            |            |
| 20202     | S100a9        | S100 calcium binding protein A9 (calgranulin B)                                        | 1             |           |             | 7.38       |            |            |             |                                                  |            |            |
| 83379     | Klb           | klotho beta                                                                            | 1             |           |             | 6.67       |            |            |             |                                                  |            |            |
| 17200     | Mc2r          | melanocortin 2 receptor                                                                | 1             |           |             | 4.38       |            |            |             |                                                  |            |            |
| 18406     | Orm2          | orosomucoid 2                                                                          | 1             |           |             | 3.90       |            |            |             | 3                                                | 5.1        | 0.06       |

| Gene ID | Symbol        | Description                                                                     | DEG/Set count | 2mWT_2mKO | 20mWT_20mKO | 2mKO_20mKO | 2mWT_20mWT | 2mWT_30mWT | 20mWT_30mWT | Literature-Mining (Aging-Cholesterol literature) |            |            |  |
|---------|---------------|---------------------------------------------------------------------------------|---------------|-----------|-------------|------------|------------|------------|-------------|--------------------------------------------------|------------|------------|--|
|         |               |                                                                                 |               | 9         | 230         | 406        | 48         | 1904       | 1157        | #Paper                                           | Enrichment | BH P-value |  |
| 22095   | Tshr          | thyroid stimulating hormone receptor                                            | 1             |           |             | 3.85       |            |            |             |                                                  |            |            |  |
| 226049  | Dmrt2         | doublesex and mab-3 related transcription factor 2                              | 1             |           |             | 3.74       |            |            |             |                                                  |            |            |  |
| 116939  | Pnpla3        | patatin-like phospholipase domain containing 3                                  | 1             |           |             | 3.66       |            |            |             | 1                                                | 46.4       | 0.06       |  |
| 21835   | Thrsp         | thyroid hormone responsive SPOT14 homolog (Rattus)                              | 1             |           |             | 3.49       |            |            |             | 1                                                | 12.8       | 0.15       |  |
| 69189   | 1810033B17Rik | RIKEN cDNA 1810033B17 gene                                                      | 1             |           |             | 3.34       |            |            |             |                                                  |            |            |  |
| 69861   | 2010003K11Rik | RIKEN cDNA 2010003K11 gene                                                      | 1             |           |             | 3.25       |            |            |             |                                                  |            |            |  |
| 244416  | Ppp1r3b       | protein phosphatase 1, regulatory (inhibitor) subunit 3B                        | 1             |           |             | 3.04       |            |            |             |                                                  |            |            |  |
| 15203   | Heph          | hephaestin                                                                      | 1             |           |             | 2.98       |            |            |             | 1                                                | 25.9       | 0.09       |  |
| 319743  | 9630013D21Rik | RIKEN cDNA 9630013D21 gene                                                      | 1             |           |             | 2.95       |            |            |             |                                                  |            |            |  |
| 79456   | Recq14        | RecQ protein-like 4                                                             | 1             |           |             | 2.87       |            |            |             |                                                  |            |            |  |
| 56078   | Car5b         | carbonic anhydrase 5b, mitochondrial                                            | 1             |           |             | 2.66       |            |            |             |                                                  |            |            |  |
| 17001   | Ltc4s         | leukotriene C4 synthase                                                         | 1             |           |             | 2.62       |            |            |             |                                                  |            |            |  |
| 13809   | Enpep         | glutamyl aminopeptidase                                                         | 1             |           |             | 2.44       |            |            |             |                                                  |            |            |  |
| 319942  | A530016L24Rik | RIKEN cDNA A530016L24 gene                                                      | 1             |           |             | 2.44       |            |            |             |                                                  |            |            |  |
| 56485   | Slc2a5        | solute carrier family 2 (facilitated glucose transporter), member 5             | 1             |           |             | 2.41       |            |            |             | 1                                                | 19.5       | 0.11       |  |
| 14562   | Gdf3          | growth differentiation factor 3                                                 | 1             |           |             | 2.40       |            |            |             |                                                  |            |            |  |
| 18639   | Pfkfb1        | 6-phosphofructo-2-kinase/fructose-2,6-bisphosphatase 1                          | 1             |           |             | 2.38       |            |            |             |                                                  |            |            |  |
| 18407   | Orm3          | orosomucoid 3                                                                   | 1             |           |             | 2.38       |            |            |             |                                                  |            |            |  |
| 67800   | Dgat2         | diacylglycerol O-acyltransferase 2                                              | 1             |           |             | 2.37       |            |            |             | 2                                                | 71.1       | 2.41E-03   |  |
| 18631   | Pex11a        | peroxisomal biogenesis factor 11 alpha                                          | 1             |           |             | 2.31       |            |            |             |                                                  |            |            |  |
| 18030   | Nfil3         | nuclear factor, interleukin 3, regulated                                        | 1             |           |             | 2.22       |            |            |             |                                                  |            |            |  |
| 72121   | Dennd2d       | DENN/MADD domain containing 2D                                                  | 1             |           |             | 2.21       |            |            |             |                                                  |            |            |  |
| 67468   | Mmd           | monocyte to macrophage differentiation-associated                               | 1             |           |             | 2.16       |            |            |             |                                                  |            |            |  |
| 26358   | Aldh1a7       | aldehyde dehydrogenase family 1, subfamily A7                                   | 1             |           |             | 2.09       |            |            |             |                                                  |            |            |  |
| 14874   | Gstz1         | glutathione transferase zeta 1 (maleylacetoacetate isomerase)                   | 1             |           |             | 2.00       |            |            |             |                                                  |            |            |  |
| 73699   | Ppp2r1b       | protein phosphatase 2 (formerly 2A), regulatory subunit A (PR 65), beta isoform | 1             |           |             | 1.99       |            |            |             |                                                  |            |            |  |
| 245945  | Rbm47         | RNA binding motif protein 47                                                    | 1             |           |             | 1.99       |            |            |             |                                                  |            |            |  |
| 20733   | Spint2        | serine protease inhibitor, Kunitz type 2                                        | 1             |           |             | 1.94       |            |            |             |                                                  |            |            |  |
| 330189  | Tmem120b      | transmembrane protein 120B                                                      | 1             |           |             | 1.93       |            |            |             |                                                  |            |            |  |
| 11556   | Adrb3         | adrenergic receptor, beta 3                                                     | 1             |           |             | 1.93       |            |            |             | 3                                                | 31.9       | 9.29E-04   |  |
| 20962   | Sycp3         | synaptonemal complex protein 3                                                  | 1             |           |             | 1.90       |            |            |             |                                                  |            |            |  |
| 112407  | Egln3         | EGL nine homolog 3 (C. elegans)                                                 | 1             |           |             | 1.88       |            |            |             |                                                  |            |            |  |
| 192200  | Wfdc12        | WAP four-disulfide core domain 12                                               | 1             |           |             | 1.85       |            |            |             |                                                  |            |            |  |
| 21857   | Timp1         | tissue inhibitor of metalloproteinase 1                                         | 1             |           |             | 1.84       |            |            |             | 2                                                | 1.1        | 0.74       |  |
| 494504  | Apcdd1        | adenomatosis polyposis coli down-regulated 1                                    | 1             |           |             | 1.83       |            |            |             |                                                  |            |            |  |
| 14257   | Flt4          | FMS-like tyrosine kinase 4                                                      | 1             |           |             | 1.81       |            |            |             |                                                  |            |            |  |
| 118449  | Synpo2        | synaptopodin 2                                                                  | 1             |           |             | 1.80       |            |            |             |                                                  |            |            |  |
| 18563   | Pcx           | pyruvate carboxylase                                                            | 1             |           |             | 1.80       |            |            |             |                                                  |            |            |  |
| 67182   | Pdzk1ip1      | PDZK1 interacting protein 1                                                     | 1             |           |             | 1.79       |            |            |             |                                                  |            |            |  |
| 76041   | Ccdc125       | coiled-coil domain containing 125                                               | 1             |           |             | 1.79       |            |            |             |                                                  |            |            |  |
| 76282   | Gpt           | glutamic pyruvic transaminase, soluble                                          | 1             |           |             | 1.77       |            |            |             | 32                                               | 9.4        | 3.70E-19   |  |
| 212862  | Chpt1         | choline phosphotransferase 1                                                    | 1             |           |             | 1.77       |            |            |             | 3                                                | 19.5       | 3.22E-03   |  |
| 14104   | Fasn          | fatty acid synthase                                                             | 1             |           |             | 1.73       |            |            |             | 10                                               | 15.1       | 3.36E-08   |  |
| 60525   | Acss2         | acyl-CoA synthetase short-chain family member 2                                 | 1             |           |             | 1.72       |            |            |             |                                                  |            |            |  |
| 54120   | Gipc2         | GIPC PDZ domain containing family, member 2                                     | 1             |           |             | 1.72       |            |            |             |                                                  |            |            |  |
| 14555   | Gpd1          | glycerol-3-phosphate dehydrogenase 1 (soluble)                                  | 1             |           |             | 1.71       |            |            |             |                                                  |            |            |  |
| 241694  | Ralgapa2      | Ral GTPase activating protein, alpha subunit 2 (catalytic)                      | 1             |           |             | 1.69       |            |            |             |                                                  |            |            |  |
| 13609   | S1pr1         | sphingosine-1-phosphate receptor 1                                              | 1             |           |             | 1.68       |            |            |             |                                                  |            |            |  |
| 11637   | Ak2           | adenylate kinase 2                                                              | 1             |           |             | 1.67       |            |            |             |                                                  |            |            |  |
| 277414  | Trp53i11      | transformation related protein 53 inducible protein 11                          | 1             |           |             | 1.67       |            |            |             |                                                  |            |            |  |
| 13120   | Cyp4b1        | cytochrome P450, family 4, subfamily b, polypeptide 1                           | 1             |           |             | 1.66       |            |            |             |                                                  |            |            |  |
| 72472   | Slc16a10      | solute carrier family 16 (monocarboxylic acid transporters), member 10          | 1             |           |             | 1.64       |            |            |             |                                                  |            |            |  |
| 19885   | Rorc          | RAR-related orphan receptor gamma                                               | 1             |           |             | 1.63       |            |            |             |                                                  |            |            |  |
| 235135  | Tmem45b       | transmembrane protein 45b                                                       | 1             |           |             | 1.63       |            |            |             |                                                  |            |            |  |
| 14792   | Lpcat3        | lysophosphatidylcholine acyltransferase 3                                       | 1             |           |             | 1.61       |            |            |             |                                                  |            |            |  |
| 243374  | Gimap8        | GTPase, IMAP family member 8                                                    | 1             |           |             | 1.60       |            |            |             |                                                  |            |            |  |
| 71693   | Colec11       | collectin sub-family member 11                                                  | 1             |           |             | 1.59       |            |            |             |                                                  |            |            |  |
| 11861   | Arl4a         | ADP-ribosylation factor-like 4A                                                 | 1             |           |             | 1.56       |            |            |             |                                                  |            |            |  |
| 240168  | Rasgrp3       | RAS, guanyl releasing protein 3                                                 | 1             |           |             | 1.55       |            |            |             |                                                  |            |            |  |
| 19011   | Endou         | endonuclease, polyU-specific                                                    | 1             |           |             | 1.54       |            |            |             |                                                  |            |            |  |
| 317758  | Gimap9        | GTPase, IMAP family member 9                                                    | 1             |           |             | 1.54       |            |            |             |                                                  |            |            |  |
| 14396   | Gabra3        | gamma-aminobutyric acid (GABA) A receptor, subunit alpha 3                      | 1             |           |             | 1.53       |            |            |             |                                                  |            |            |  |
| 22341   | Vegfc         | vascular endothelial growth factor C                                            | 1             |           |             | 1.50       |            |            |             |                                                  |            |            |  |
| 107476  | Acaca         | acetyl-Coenzyme A carboxylase alpha                                             | 1             |           |             | 1.49       |            |            |             | 3                                                | 9.1        | 0.02       |  |
| 56738   | Mocs1         | molybdenum cofactor synthesis 1                                                 | 1             |           |             | 1.49       |            |            |             |                                                  |            |            |  |
| 15064   | Mr1           | major histocompatibility complex, class I-related                               | 1             |           |             | 1.48       |            |            |             |                                                  |            |            |  |
| 66307   | Isoc1         | isochorismatase domain containing 1                                             | 1             |           |             | 1.48       |            |            |             |                                                  |            |            |  |
| 110208  | Pgd           | phosphogluconate dehydrogenase                                                  | 1             |           |             | 1.46       |            |            |             |                                                  |            |            |  |
| 228026  | Pdk1          | pyruvate dehydrogenase kinase, isoenzyme 1                                      | 1             |           |             | 1.46       |            |            |             | 2                                                | 4          | 0.16       |  |
| 12580   | Cdkn2c        | cyclin-dependent kinase inhibitor 2C (p18, inhibits CDK4)                       | 1             |           |             | 1.45       |            |            |             |                                                  |            |            |  |

| Gene ID   | Symbol        | Description                                                                       | DEG/Set count | 2mWT_2mKO | 20mWT_20mKO | 2mKO_20mKO | 2mWT_20mWT | 2mWT_30mWT | 20mWT_30mWT | Literature-Mining (Aging-Cholesterol literature) |            |            |
|-----------|---------------|-----------------------------------------------------------------------------------|---------------|-----------|-------------|------------|------------|------------|-------------|--------------------------------------------------|------------|------------|
|           |               |                                                                                   |               | 9         | 230         | 406        | 48         | 1904       | 1157        | #Paper                                           | Enrichment | BH P-value |
| 503610    | Zdhc18        | zinc finger, DHHC domain containing 18                                            | 1             |           |             | 1.44       |            |            |             |                                                  |            |            |
| 78088     | Ankrd56       | ankyrin repeat domain 56                                                          | 1             |           |             | 1.42       |            |            |             |                                                  |            |            |
| 233789    | Smg1          | SMG1 homolog, phosphatidylinositol 3-kinase-related kinase (C. elegans)           | 1             |           |             | 1.42       |            |            |             |                                                  |            |            |
| 67384     | Bag4          | BCL2-associated athanogene 4                                                      | 1             |           |             | 1.41       |            |            |             |                                                  |            |            |
| 14594     | Ggta1         | glycoprotein galactosyltransferase alpha 1, 3                                     | 1             |           |             | 1.41       |            |            |             |                                                  |            |            |
| 238799    | Tnpo1         | transportin 1                                                                     | 1             |           |             | 1.40       |            |            |             | 1                                                | 5.5        | 0.24       |
| 100087    | Kti12         | KTI12 homolog, chromatin associated (S. cerevisiae)                               | 1             |           |             | 1.40       |            |            |             |                                                  |            |            |
| 67824     | Nmral1        | NmrA-like family domain containing 1                                              | 1             |           |             | 1.40       |            |            |             |                                                  |            |            |
| 11540     | Adora2a       | adenosine A2a receptor                                                            | 1             |           |             | 1.39       |            |            |             |                                                  |            |            |
| 320302    | Git28d2       | glycosyltransferase 28 domain containing 2                                        | 1             |           |             | 1.38       |            |            |             |                                                  |            |            |
| 76306     | 1110021L09Rik | RIKEN cDNA 1110021L09 gene                                                        | 1             |           |             | 1.38       |            |            |             |                                                  |            |            |
| 66949     | Trim59        | tripartite motif-containing 59                                                    | 1             |           |             | 1.38       |            |            |             |                                                  |            |            |
| 317757    | Gimap5        | GTPase, IMAP family member 5                                                      | 1             |           |             | 1.38       |            |            |             |                                                  |            |            |
| 240505    | Cdc42bpg      | CDC42 binding protein kinase gamma (DMPK-like)                                    | 1             |           |             | 1.38       |            |            |             |                                                  |            |            |
| 20969     | Sdc1          | syndecan 1                                                                        | 1             |           |             | 1.37       |            |            |             |                                                  |            |            |
| 193740    | Hspa1a        | heat shock protein 1A                                                             | 1             |           |             | 1.37       |            |            |             | 13                                               | 3.2        | 1.93E-03   |
| 19205     | Ptbp1         | polypyrimidine tract binding protein 1                                            | 1             |           |             | 1.36       |            |            |             |                                                  |            |            |
| 15904     | Id4           | inhibitor of DNA binding 4                                                        | 1             |           |             | 1.35       |            |            |             |                                                  |            |            |
| 18018     | Nfatc1        | nuclear factor of activated T-cells, cytoplasmic, calcineurin-dependent 1         | 1             |           |             | 1.34       |            |            |             |                                                  |            |            |
| 21938     | Tnfrsf1b      | tumor necrosis factor receptor superfamily, member 1b                             | 1             |           |             | 1.34       |            |            |             | 2                                                | 4.4        | 0.15       |
| 268291    | Rnf217        | ring finger protein 217                                                           | 1             |           |             | 1.34       |            |            |             |                                                  |            |            |
| 214987    | Chtf8         | CTF8, chromosome transmission fidelity factor 8 homolog (S. cerevisiae)           | 1             |           |             | 1.34       |            |            |             |                                                  |            |            |
| 71683     | Gypc          | glycophorin C                                                                     | 1             |           |             | 1.33       |            |            |             |                                                  |            |            |
| 100040608 | Fancl         | Fanconi anemia, complementation group F                                           | 1             |           |             | 1.33       |            |            |             |                                                  |            |            |
| 17436     | Me1           | malic enzyme 1, NADP(+)-dependent, cytosolic                                      | 1             |           |             | 1.33       |            |            |             | 3                                                | 2.5        | 0.19       |
| 17064     | Cd93          | CD93 antigen                                                                      | 1             |           |             | 1.32       |            |            |             |                                                  |            |            |
| 69674     | Mif4gd        | MIF4G domain containing                                                           | 1             |           |             | 1.32       |            |            |             |                                                  |            |            |
| 432572    | Specc1        | sperm antigen with calponin homology and coiled-coil domains 1                    | 1             |           |             | 1.32       |            |            |             |                                                  |            |            |
| 140483    | Hnmt          | histamine N-methyltransferase                                                     | 1             |           |             | 1.31       |            |            |             |                                                  |            |            |
| 20723     | Serpinb9      | serine (or cysteine) peptidase inhibitor, clade B, member 9                       | 1             |           |             | 1.31       |            |            |             |                                                  |            |            |
| 17215     | Mcm3          | minichromosome maintenance deficient 3 (S. cerevisiae)                            | 1             |           |             | 1.30       |            |            |             |                                                  |            |            |
| 11745     | Anxa3         | annexin A3                                                                        | 1             |           |             | 1.29       |            |            |             | 1                                                | 47         | 0.06       |
| 228889    | Ddx27         | DEAD (Asp-Glu-Ala-Asp) box polypeptide 27                                         | 1             |           |             | 1.28       |            |            |             |                                                  |            |            |
| 104112    | Acly          | ATP citrate lyase                                                                 | 1             |           |             | 1.28       |            |            |             | 1                                                | 4.7        | 0.27       |
| 18104     | Nqo1          | NAD(P)H dehydrogenase, quinone 1                                                  | 1             |           |             | 1.27       |            |            |             | 2                                                | 2.3        | 0.30       |
| 66841     | Etfdh         | electron transferring flavoprotein, dehydrogenase                                 | 1             |           |             | 1.26       |            |            |             |                                                  |            |            |
| 230484    | Usp1          | ubiquitin specific peptidase 1                                                    | 1             |           |             | 1.24       |            |            |             |                                                  |            |            |
| 17250     | Abcc1         | ATP-binding cassette, sub-family C (CFTR/MRP), member 1                           | 1             |           |             | 1.23       |            |            |             | 2                                                | 2.5        | 0.27       |
| 66230     | Mrps28        | mitochondrial ribosomal protein S28                                               | 1             |           |             | 1.23       |            |            |             |                                                  |            |            |
| 68292     | Stt3b         | STT3, subunit of the oligosaccharyltransferase complex, homolog B (S. cerevisiae) | 1             |           |             | 1.22       |            |            |             |                                                  |            |            |
| 73078     | Pmpcb         | peptidase (mitochondrial processing) beta                                         | 1             |           |             | 1.21       |            |            |             |                                                  |            |            |
| 17975     | Ncl           | nucleolin                                                                         | 1             |           |             | 1.20       |            |            |             |                                                  |            |            |
| 70508     | Bbx           | bobby sox homolog (Drosophila)                                                    | 1             |           |             | 1.20       |            |            |             |                                                  |            |            |
| 13664     | Eif1a         | eukaryotic translation initiation factor 1A                                       | 1             |           |             | 1.19       |            |            |             |                                                  |            |            |
| 18813     | Pa2g4         | proliferation-associated 2G4                                                      | 1             |           |             | 1.19       |            |            |             |                                                  |            |            |
| 66375     | Dhrs7         | dehydrogenase/reductase (SDR family) member 7                                     | 1             |           |             | 1.19       |            |            |             |                                                  |            |            |
| 13033     | Ctsd          | cathepsin D                                                                       | 1             |           |             | 1.17       |            |            |             | 2                                                | 2          | 0.33       |
| 12974     | Cs            | citrate synthase                                                                  | 1             |           |             | 1.17       |            |            |             | 1                                                | 1.2        | 0.60       |
| 68263     | Pdhb          | pyruvate dehydrogenase (lipoamide) beta                                           | 1             |           |             | 1.16       |            |            |             | 3                                                | 3          | 0.15       |
| 70564     | 5730469M10Rik | RIKEN cDNA 5730469M10 gene                                                        | 1             |           |             | 1.16       |            |            |             |                                                  |            |            |
| 22333     | Vdac1         | voltage-dependent anion channel 1                                                 | 1             |           |             | -1.10      |            |            |             | 2                                                | 6.3        | 0.10       |
| 71765     | Klhdc3        | kelch domain containing 3                                                         | 1             |           |             | -1.19      |            |            |             |                                                  |            |            |
| 79566     | Sh3bp5l       | SH3 binding domain protein 5 like                                                 | 1             |           |             | -1.21      |            |            |             |                                                  |            |            |
| 209378    | Itih5         | inter-alpha (globulin) inhibitor H5                                               | 1             |           |             | -1.24      |            |            |             |                                                  |            |            |
| 215008    | Vezt          | vezatin, adherens junctions transmembrane protein                                 | 1             |           |             | -1.25      |            |            |             |                                                  |            |            |
| 18822     | Plod1         | procollagen-lysine, 2-oxoglutarate 5-dioxygenase 1                                | 1             |           |             | -1.25      |            |            |             |                                                  |            |            |
| 14073     | Faah          | fatty acid amide hydrolase                                                        | 1             |           |             | -1.25      |            |            |             |                                                  |            |            |
| 67046     | Tbc1d7        | TBC1 domain family, member 7                                                      | 1             |           |             | -1.28      |            |            |             |                                                  |            |            |
| 667742    | Fam38b        | family with sequence similarity 38, member B                                      | 1             |           |             | -1.28      |            |            |             |                                                  |            |            |
| 17207     | Mcf2l         | mcf.2 transforming sequence-like                                                  | 1             |           |             | -1.29      |            |            |             |                                                  |            |            |
| 192734    | Al646023      | expressed sequence Al646023                                                       | 1             |           |             | -1.29      |            |            |             |                                                  |            |            |
| 212919    | Kctd7         | potassium channel tetramerisation domain containing 7                             | 1             |           |             | -1.31      |            |            |             |                                                  |            |            |
| 319504    | Nrcam         | neuron-glia-CAM-related cell adhesion molecule                                    | 1             |           |             | -1.32      |            |            |             |                                                  |            |            |
| 64339     | Fndc4         | fibronectin type III domain containing 4                                          | 1             |           |             | -1.33      |            |            |             |                                                  |            |            |
| 16773     | Lama2         | laminin, alpha 2                                                                  | 1             |           |             | -1.34      |            |            |             |                                                  |            |            |
| 18761     | Prkcq         | protein kinase C, theta                                                           | 1             |           |             | -1.36      |            |            |             |                                                  |            |            |
| 93734     | Mpv17l        | Mpv17 transgene, kidney disease mutant-like                                       | 1             |           |             | -1.36      |            |            |             |                                                  |            |            |
| 12323     | Camk2b        | calcium/calmodulin-dependent protein kinase II, beta                              | 1             |           |             | -1.37      |            |            |             |                                                  |            |            |



| Gene ID   | Symbol        | Description                                                                                    | DEG/Set count | 2mWT_2mKO | 20mWT_20mKO | 2mKO_20mKO | 2mWT_20mWT | 2mWT_30mWT | 20mWT_30mWT | Literature-Mining (Aging-Cholesterol literature) |            |            |
|-----------|---------------|------------------------------------------------------------------------------------------------|---------------|-----------|-------------|------------|------------|------------|-------------|--------------------------------------------------|------------|------------|
|           |               |                                                                                                |               | 9         | 230         | 406        | 48         | 1904       | 1157        | #Paper                                           | Enrichment | BH P-value |
| 77552     | Shisa4        | shisa homolog 4 (Xenopus laevis)                                                               | 1             |           |             | -1.37      |            |            |             |                                                  |            |            |
| 109264    | Me3           | malic enzyme 3, NADP(+)-dependent, mitochondrial                                               | 1             |           |             | -1.38      |            |            |             |                                                  |            |            |
| 233724    | Tmem41b       | transmembrane protein 41B                                                                      | 1             |           |             | -1.41      |            |            |             |                                                  |            |            |
| 73720     | Cst6          | cystatin E/M                                                                                   | 1             |           |             | -1.41      |            |            |             |                                                  |            |            |
| 268970    | Arhgap28      | Rho GTPase activating protein 28                                                               | 1             |           |             | -1.43      |            |            |             |                                                  |            |            |
| 215690    | Nav1          | neuron navigator 1                                                                             | 1             |           |             | -1.44      |            |            |             |                                                  |            |            |
| 12842     | Col1a1        | collagen, type I, alpha 1                                                                      | 1             |           |             | -1.46      |            |            |             | 47                                               | 1.9        | 6.44E-04   |
| 622675    | Zfp827        | zinc finger protein 827                                                                        | 1             |           |             | -1.46      |            |            |             |                                                  |            |            |
| 14026     | Evl           | Ena-vasodilator stimulated phosphoprotein                                                      | 1             |           |             | -1.47      |            |            |             |                                                  |            |            |
| 100504154 | Gm15050       | predicted gene 15050                                                                           | 1             |           |             | -1.50      |            |            |             |                                                  |            |            |
| 227541    | Camk1d        | calcium/calmodulin-dependent protein kinase ID                                                 | 1             |           |             | -1.50      |            |            |             |                                                  |            |            |
| 140492    | Kcnn2         | potassium intermediate/small conductance calcium-activated channel, subfamily N, member 2      | 1             |           |             | -1.51      |            |            |             |                                                  |            |            |
| 100504135 | Gm20081       | predicted gene, 20081                                                                          | 1             |           |             | -1.52      |            |            |             |                                                  |            |            |
| 99031     | Osbpl6        | oxysterol binding protein-like 6                                                               | 1             |           |             | -1.52      |            |            |             |                                                  |            |            |
| 14190     | Fgl2          | fibrinogen-like protein 2                                                                      | 1             |           |             | -1.54      |            |            |             |                                                  |            |            |
| 65115     | Bean1         | brain expressed, associated with Nedd4, 1                                                      | 1             |           |             | -1.61      |            |            |             |                                                  |            |            |
| 17968     | Ncam2         | neural cell adhesion molecule 2                                                                | 1             |           |             | -1.61      |            |            |             |                                                  |            |            |
| 74166     | Tmem38a       | transmembrane protein 38A                                                                      | 1             |           |             | -1.62      |            |            |             |                                                  |            |            |
| 235281    | Scn3b         | sodium channel, voltage-gated, type III, beta                                                  | 1             |           |             | -1.66      |            |            |             |                                                  |            |            |
| 78925     | Srd5a1        | steroid 5 alpha-reductase 1                                                                    | 1             |           |             | -1.66      |            |            |             | 3                                                | 6.3        | 0.04       |
| 16816     | Lcat          | lecithin cholesterol acyltransferase                                                           | 1             |           |             | -1.70      |            |            |             | 31                                               | 84.4       | 2.21E-46   |
| 12830     | Col4a5        | collagen, type IV, alpha 5                                                                     | 1             |           |             | -1.71      |            |            |             |                                                  |            |            |
| 381633    | Gm1673        | predicted gene 1673                                                                            | 1             |           |             | -1.74      |            |            |             |                                                  |            |            |
| 73287     | 1700040L02Rik | RIKEN cDNA 1700040L02 gene                                                                     | 1             |           |             | -1.74      |            |            |             |                                                  |            |            |
| 100504205 | Kcnn8         | NA                                                                                             | 1             |           |             | -1.74      |            |            |             |                                                  |            |            |
| 16322     | Inha          | inhibin alpha                                                                                  | 1             |           |             | -1.76      |            |            |             |                                                  |            |            |
| 15413     | Hoxb5         | homeobox B5                                                                                    | 1             |           |             | -1.79      |            |            |             |                                                  |            |            |
| 23937     | Mab21l2       | mab-21-like 2 (C. elegans)                                                                     | 1             |           |             | -1.79      |            |            |             |                                                  |            |            |
| 384061    | Fndc5         | fibronectin type III domain containing 5                                                       | 1             |           |             | -1.82      |            |            |             |                                                  |            |            |
| 320460    | Vwc2l         | von Willebrand factor C domain-containing protein 2-like                                       | 1             |           |             | -1.90      |            |            |             |                                                  |            |            |
| 17263     | Meg3          | maternally expressed 3                                                                         | 1             |           |             | -1.92      |            |            |             |                                                  |            |            |
| 78977     | Popdc3        | popeye domain containing 3                                                                     | 1             |           |             | -1.96      |            |            |             |                                                  |            |            |
| 18802     | Plcd4         | phospholipase C, delta 4                                                                       | 1             |           |             | -2.03      |            |            |             |                                                  |            |            |
| 27281     | Hrasls        | HRAS-like suppressor                                                                           | 1             |           |             | -2.09      |            |            |             |                                                  |            |            |
| 218624    | Il31ra        | interleukin 31 receptor A                                                                      | 1             |           |             | -2.11      |            |            |             |                                                  |            |            |
| 330119    | Adamts3       | a disintegrin-like and metalloproteinase (reprolysin type) with thrombospondin type 1 motif, 3 | 1             |           |             | -2.12      |            |            |             |                                                  |            |            |
| 22771     | Zic1          | zinc finger protein of the cerebellum 1                                                        | 1             |           |             | -2.33      |            |            |             |                                                  |            |            |
| 545527    | Fam194a       | family with sequence similarity 194, member A                                                  | 1             |           |             | -2.41      |            |            |             |                                                  |            |            |
| 15357     | Hmgcr         | 3-hydroxy-3-methylglutaryl-Coenzyme A reductase                                                | 1             |           |             | -2.54      |            |            |             | 48                                               | 110.7      | 2.64E-77   |
| 67473     | Slc47a1       | solute carrier family 47, member 1                                                             | 1             |           |             | -2.60      |            |            |             |                                                  |            |            |
| 108907    | Nusap1        | nucleolar and spindle associated protein 1                                                     | 1             |           |             |            |            |            | 5.71        |                                                  |            |            |
| 14191     | Fgr           | Gardner-Rasheed feline sarcoma viral (Fgr) oncogene homolog                                    | 1             |           |             |            |            |            | 4.35        |                                                  |            |            |
| 105418    | E330034G19Rik | RIKEN cDNA E330034G19 gene                                                                     | 1             |           |             |            |            |            | 3.74        |                                                  |            |            |
| 64011     | Nrgn          | neurogranin                                                                                    | 1             |           |             |            |            |            | 3.61        |                                                  |            |            |
| 12229     | Btk           | Bruton agammaglobulinemia tyrosine kinase                                                      | 1             |           |             |            |            |            | 3.55        |                                                  |            |            |
| 19253     | Ptpn18        | protein tyrosine phosphatase, non-receptor type 18                                             | 1             |           |             |            |            |            | 3.23        |                                                  |            |            |
| 22376     | Was           | Wiskott-Aldrich syndrome homolog (human)                                                       | 1             |           |             |            |            |            | 3.08        |                                                  |            |            |
| 216984    | Evi2b         | ecotropic viral integration site 2b                                                            | 1             |           |             |            |            |            | 2.98        |                                                  |            |            |
| 78317     | Ccdc88b       | coiled-coil domain containing 88B                                                              | 1             |           |             |            |            |            | 2.91        |                                                  |            |            |
| 16985     | Lsp1          | lymphocyte specific 1                                                                          | 1             |           |             |            |            |            | 2.90        |                                                  |            |            |
| 17096     | Lyn           | Yamaguchi sarcoma viral (v-yes-1) oncogene homolog                                             | 1             |           |             |            |            |            | 2.77        | 1                                                | 4.6        | 0.27       |
| 224860    | Plcl2         | phospholipase C-like 2                                                                         | 1             |           |             |            |            |            | 2.74        |                                                  |            |            |
| 12534     | Cdk1          | cyclin-dependent kinase 1                                                                      | 1             |           |             |            |            |            | 2.65        |                                                  |            |            |
| 66977     | Nuf2          | NUF2, NDC80 kinetochore complex component, homolog (S. cerevisiae)                             | 1             |           |             |            |            |            | 2.60        |                                                  |            |            |
| 27405     | Abcg3         | ATP-binding cassette, sub-family G (WHITE), member 3                                           | 1             |           |             |            |            |            | 2.56        |                                                  |            |            |
| 30955     | Pik3cg        | phosphoinositide-3-kinase, catalytic, gamma polypeptide                                        | 1             |           |             |            |            |            | 2.52        | 1                                                | 1.2        | 0.62       |
| 69987     | 1700026L06Rik | RIKEN cDNA 1700026L06 gene                                                                     | 1             |           |             |            |            |            | 2.52        |                                                  |            |            |
| 67177     | Cdt1          | chromatin licensing and DNA replication factor 1                                               | 1             |           |             |            |            |            | 2.45        |                                                  |            |            |
| 15366     | Hmnr          | hyaluronan mediated motility receptor (RHAMM)                                                  | 1             |           |             |            |            |            | 2.42        |                                                  |            |            |
| 106878    | 2010002N04Rik | RIKEN cDNA 2010002N04 gene                                                                     | 1             |           |             |            |            |            | 2.37        |                                                  |            |            |
| 66329     | Susd3         | sushi domain containing 3                                                                      | 1             |           |             |            |            |            | 2.32        |                                                  |            |            |
| 50931     | Il27ra        | interleukin 27 receptor, alpha                                                                 | 1             |           |             |            |            |            | 2.31        |                                                  |            |            |
| 14526     | Gcg           | glucagon                                                                                       | 1             |           |             |            |            |            | 2.28        |                                                  |            |            |
| 66929     | Asf1b         | ASF1 anti-silencing function 1 homolog B (S. cerevisiae)                                       | 1             |           |             |            |            |            | 2.26        | 1                                                | 1          | 0.67       |
| 321019    | Gpr183        | G protein-coupled receptor 183                                                                 | 1             |           |             |            |            |            | 2.23        |                                                  |            |            |
| 22256     | Ung           | uracil DNA glycosylase                                                                         | 1             |           |             |            |            |            | 2.21        |                                                  |            |            |
| 217166    | Nr1d1         | nuclear receptor subfamily 1, group D, member 1                                                | 1             |           |             |            |            |            | 2.20        |                                                  |            |            |
| 56489     | Ikbke         | inhibitor of kappaB kinase epsilon                                                             | 1             |           |             |            |            |            | 2.20        |                                                  |            |            |
| 74039     | Nfam1         | Nfat activating molecule with ITAM motif 1                                                     | 1             |           |             |            |            |            | 2.13        |                                                  |            |            |
| 70719     | Hmha1         | histocompatibility (minor) HA-1                                                                | 1             |           |             |            |            |            | 2.11        |                                                  |            |            |

| Gene ID   | Symbol        | Description                                                                                                  | DEG/Set count | 2mWT_2mKO | 20mWT_20mKO | 2mKO_20mKO | 2mWT_20mWT | 2mWT_30mWT | 20mWT_30mWT | Literature-Mining (Aging-Cholesterol literature) |            |            |          |
|-----------|---------------|--------------------------------------------------------------------------------------------------------------|---------------|-----------|-------------|------------|------------|------------|-------------|--------------------------------------------------|------------|------------|----------|
|           |               |                                                                                                              |               | 9         | 230         | 406        | 48         | 1904       | 1157        | #Paper                                           | Enrichment | BH P-value |          |
| 320982    | Arl4c         | ADP-ribosylation factor-like 4C                                                                              | 1             |           |             |            |            |            |             |                                                  |            |            |          |
| 17095     | Lyl1          | lymphoblastic leukemia 1                                                                                     | 1             |           |             |            |            |            |             | 2.07                                             |            |            |          |
| 13197     | Gadd45a       | growth arrest and DNA-damage-inducible 45 alpha                                                              | 1             |           |             |            |            |            |             | 2.06                                             |            |            |          |
| 18627     | Per2          | period homolog 2 (Drosophila)                                                                                | 1             |           |             |            |            |            |             | 2.01                                             |            |            |          |
| 74481     | Batf2         | basic leucine zipper transcription factor, ATF-like 2                                                        | 1             |           |             |            |            |            |             | 1.97                                             |            |            |          |
| 12904     | Crabp2        | cellular retinoic acid binding protein II                                                                    | 1             |           |             |            |            |            |             | 1.97                                             |            |            |          |
| 100169874 | Gm11110       | predicted gene 11110                                                                                         | 1             |           |             |            |            |            |             | 1.96                                             |            |            |          |
| 12578     | Cdkn2a        | cyclin-dependent kinase inhibitor 2A                                                                         | 1             |           |             |            |            |            |             | 1.94                                             | 4          | 1.5        | 0.41     |
| 102626    | Mapkapk3      | mitogen-activated protein kinase-activated protein kinase 3                                                  | 1             |           |             |            |            |            |             | 1.94                                             |            |            |          |
| 14159     | Fes           | feline sarcoma oncogene                                                                                      | 1             |           |             |            |            |            |             | 1.94                                             |            |            |          |
| 12982     | Csf2ra        | colony stimulating factor 2 receptor, alpha, low-affinity (granulocyte-macrophage)                           | 1             |           |             |            |            |            |             | 1.92                                             |            |            |          |
| 237887    | Slfn10-ps     | schlafen 10, pseudogene                                                                                      | 1             |           |             |            |            |            |             | 1.91                                             |            |            |          |
| 67238     | 2810453106Rik | RIKEN cDNA 2810453106 gene                                                                                   | 1             |           |             |            |            |            |             | 1.90                                             |            |            |          |
| 85031     | Pla1a         | phospholipase A1 member A                                                                                    | 1             |           |             |            |            |            |             | 1.90                                             |            |            |          |
| 215387    | Ncaph         | non-SMC condensin I complex, subunit H                                                                       | 1             |           |             |            |            |            |             | 1.88                                             |            |            |          |
| 107995    | Cdc20         | cell division cycle 20 homolog (S. cerevisiae)                                                               | 1             |           |             |            |            |            |             | 1.87                                             |            |            |          |
| 224109    | Lrrc33        | leucine rich repeat containing 33                                                                            | 1             |           |             |            |            |            |             | 1.86                                             |            |            |          |
| 16534     | Kcnn4         | potassium intermediate/small conductance calcium-activated channel, subfamily N, member 4                    | 1             |           |             |            |            |            |             | 1.86                                             |            |            |          |
| 18491     | Pappa         | pregnancy-associated plasma protein A                                                                        | 1             |           |             |            |            |            |             | 1.84                                             |            |            |          |
| 72514     | Fgfbp3        | fibroblast growth factor binding protein 3                                                                   | 1             |           |             |            |            |            |             | 1.83                                             |            |            |          |
| 212937    | Tifab         | TRAF-interacting protein with forkhead-associated domain, family member B                                    | 1             |           |             |            |            |            |             | 1.83                                             |            |            |          |
| 54199     | Ccr12         | chemokine (C-C motif) receptor-like 2                                                                        | 1             |           |             |            |            |            |             | 1.80                                             |            |            |          |
| 74190     | 1200009106Rik | RIKEN cDNA 1200009106 gene                                                                                   | 1             |           |             |            |            |            |             | 1.79                                             |            |            |          |
| 19277     | Ptpro         | protein tyrosine phosphatase, receptor type, O                                                               | 1             |           |             |            |            |            |             | 1.77                                             |            |            |          |
| 80986     | Ckap2         | cytoskeleton associated protein 2                                                                            | 1             |           |             |            |            |            |             | 1.76                                             |            |            |          |
| 74048     | 4632428N05Rik | RIKEN cDNA 4632428N05 gene                                                                                   | 1             |           |             |            |            |            |             | 1.74                                             |            |            |          |
| 319772    | C130050O18Rik | RIKEN cDNA C130050O18 gene                                                                                   | 1             |           |             |            |            |            |             | 1.67                                             |            |            |          |
| 24014     | Rnasel        | ribonuclease L (2', 5'-oligoadenylate synthetase-dependent)                                                  | 1             |           |             |            |            |            |             | 1.66                                             |            |            |          |
| 106795    | Tcf19         | transcription factor 19                                                                                      | 1             |           |             |            |            |            |             | 1.64                                             |            |            |          |
| 211770    | Trib1         | tribbles homolog 1 (Drosophila)                                                                              | 1             |           |             |            |            |            |             | 1.63                                             |            |            |          |
| 72461     | Prpc          | prolylcarboxypeptidase (angiotensinase C)                                                                    | 1             |           |             |            |            |            |             | 1.63                                             |            |            |          |
| 66889     | Rnf128        | ring finger protein 128                                                                                      | 1             |           |             |            |            |            |             | 1.63                                             |            |            |          |
| 50706     | Postn         | periostin, osteoblast specific factor                                                                        | 1             |           |             |            |            |            |             | 1.63                                             | 1          | 10.2       | 0.17     |
| 217835    | Rin3          | Ras and Rab interactor 3                                                                                     | 1             |           |             |            |            |            |             | 1.62                                             |            |            |          |
| 270084    | Lpcat2        | lysophosphatidylcholine acyltransferase 2                                                                    | 1             |           |             |            |            |            |             | 1.60                                             |            |            |          |
| 229541    | Denn4b        | DENN/MADD domain containing 4B                                                                               | 1             |           |             |            |            |            |             | 1.59                                             |            |            |          |
| 19246     | Ptpn1         | protein tyrosine phosphatase, non-receptor type 1                                                            | 1             |           |             |            |            |            |             | 1.59                                             | 2          | 7.7        | 0.07     |
| 12978     | Csf1r         | colony stimulating factor 1 receptor                                                                         | 1             |           |             |            |            |            |             | 1.58                                             |            |            |          |
| 21906     | Otop1         | otopetrin 1                                                                                                  | 1             |           |             |            |            |            |             | 1.58                                             |            |            |          |
| 20111     | Rps6ka1       | ribosomal protein S6 kinase polypeptide 1                                                                    | 1             |           |             |            |            |            |             | 1.58                                             |            |            |          |
| 20448     | St6galnac4    | ST6 (alpha-N-acetylneuraminyl-2,3-beta-galactosyl-1,3)-N-acetylgalactosaminide alpha-2,6-sialyltransferase 4 | 1             |           |             |            |            |            |             | 1.57                                             |            |            |          |
| 67951     | Tubb6         | tubulin, beta 6 class V                                                                                      | 1             |           |             |            |            |            |             | 1.56                                             |            |            |          |
| 71801     | Plekhf2       | pleckstrin homology domain containing, family F (with FYVE domain) member 2                                  | 1             |           |             |            |            |            |             | 1.56                                             |            |            |          |
| 12489     | Cd33          | CD33 antigen                                                                                                 | 1             |           |             |            |            |            |             | 1.56                                             | 1          | 1.9        | 0.46     |
| 56427     | Tubd1         | tubulin, delta 1                                                                                             | 1             |           |             |            |            |            |             | 1.56                                             |            |            |          |
| 216881    | Wscd1         | WSC domain containing 1                                                                                      | 1             |           |             |            |            |            |             | 1.56                                             |            |            |          |
| 12495     | Entpd1        | ectonucleoside triphosphate diphosphohydrolase 1                                                             | 1             |           |             |            |            |            |             | 1.56                                             |            |            |          |
| 12822     | Col18a1       | collagen, type XVIII, alpha 1                                                                                | 1             |           |             |            |            |            |             | 1.55                                             |            |            |          |
| 74153     | Uba7          | ubiquitin-like modifier activating enzyme 7                                                                  | 1             |           |             |            |            |            |             | 1.54                                             |            |            |          |
| 208104    | Mlxip         | MLX interacting protein                                                                                      | 1             |           |             |            |            |            |             | 1.54                                             |            |            |          |
| 69136     | Tusc1         | tumor suppressor candidate 1                                                                                 | 1             |           |             |            |            |            |             | 1.53                                             |            |            |          |
| 14296     | Frat1         | frequently rearranged in advanced T-cell lymphomas                                                           | 1             |           |             |            |            |            |             | 1.53                                             |            |            |          |
| 72535     | Aldh1b1       | aldehyde dehydrogenase 1 family, member B1                                                                   | 1             |           |             |            |            |            |             | 1.50                                             |            |            |          |
| 17242     | Mdk           | midkine                                                                                                      | 1             |           |             |            |            |            |             | 1.50                                             |            |            |          |
| 110173    | Manba         | mannosidase, beta A, lysosomal                                                                               | 1             |           |             |            |            |            |             | 1.47                                             |            |            |          |
| 230279    | 6330416G13Rik | RIKEN cDNA 6330416G13 gene                                                                                   | 1             |           |             |            |            |            |             | 1.47                                             |            |            |          |
| 75430     | 3200002M19Rik | RIKEN cDNA 3200002M19 gene                                                                                   | 1             |           |             |            |            |            |             | 1.47                                             |            |            |          |
| 18074     | Nid2          | nidogen 2                                                                                                    | 1             |           |             |            |            |            |             | 1.47                                             |            |            |          |
| 19735     | Rgs2          | regulator of G-protein signaling 2                                                                           | 1             |           |             |            |            |            |             | 1.46                                             |            |            |          |
| 74008     | Arsg          | arylsulfatase G                                                                                              | 1             |           |             |            |            |            |             | 1.46                                             |            |            |          |
| 14739     | S1pr2         | sphingosine-1-phosphate receptor 2                                                                           | 1             |           |             |            |            |            |             | 1.46                                             |            |            |          |
| 217069    | Trim25        | tripartite motif-containing 25                                                                               | 1             |           |             |            |            |            |             | 1.45                                             |            |            |          |
| 56473     | Fads2         | fatty acid desaturase 2                                                                                      | 1             |           |             |            |            |            |             | 1.45                                             | 7          | 60.6       | 8.39E-10 |
| 58223     | Mmp19         | matrix metalloproteinase 19                                                                                  | 1             |           |             |            |            |            |             | 1.44                                             | 1          | 39.7       | 0.07     |
| 27419     | Naglu         | alpha-N-acetylglucosaminidase (Sanfilippo disease IIIb)                                                      | 1             |           |             |            |            |            |             | 1.44                                             | 1          | 5.7        | 0.23     |
| 69537     | Dnase111      | deoxyribonuclease 1-like 1                                                                                   | 1             |           |             |            |            |            |             | 1.44                                             |            |            |          |
| 17285     | Meox1         | mesenchyme homeobox 1                                                                                        | 1             |           |             |            |            |            |             | 1.43                                             |            |            |          |
| 72238     | Tbc1d5        | TBC1 domain family, member 5                                                                                 | 1             |           |             |            |            |            |             | 1.43                                             |            |            |          |
| 192656    | Ripk2         | receptor (TNFRSF)-interacting serine-threonine kinase 2                                                      | 1             |           |             |            |            |            |             | 1.42                                             |            |            |          |

| Gene ID | Symbol    | Description                                                                      | DEG/Set count | 2mWT_2mKO | 20mWT_20mKO | 2mKO_20mKO | 2mWT_20mWT | 2mWT_30mWT | 20mWT_30mWT | Literature-Mining (Aging-Cholesterol literature) |            |            |          |
|---------|-----------|----------------------------------------------------------------------------------|---------------|-----------|-------------|------------|------------|------------|-------------|--------------------------------------------------|------------|------------|----------|
|         |           |                                                                                  |               | 9         | 230         | 406        | 48         | 1904       | 1157        | #Paper                                           | Enrichment | BH P-value |          |
| 66164   | Nip7      | nuclear import 7 homolog (S. cerevisiae)                                         | 1             |           |             |            |            |            |             | 1.42                                             |            |            |          |
| 19025   | Ctsa      | cathepsin A                                                                      | 1             |           |             |            |            |            |             | 1.41                                             |            |            |          |
| 14806   | Grik2     | glutamate receptor, ionotropic, kainate 2 (beta 2)                               | 1             |           |             |            |            |            |             | 1.41                                             |            |            |          |
| 12266   | C3        | complement component 3                                                           | 1             |           |             |            |            |            |             | 1.41                                             |            |            |          |
| 56212   | Rhog      | ras homolog gene family, member G                                                | 1             |           |             |            |            |            |             | 1.41                                             |            |            |          |
| 13435   | Dnmt3a    | DNA methyltransferase 3A                                                         | 1             |           |             |            |            |            |             | 1.40                                             |            |            |          |
| 11482   | Acvrl1    | activin A receptor, type II-like 1                                               | 1             |           |             |            |            |            |             | 1.39                                             | 1          | 5          | 0.26     |
| 15976   | Ifnar2    | interferon (alpha and beta) receptor 2                                           | 1             |           |             |            |            |            |             | 1.39                                             |            |            |          |
| 21745   | Tep1      | telomerase associated protein 1                                                  | 1             |           |             |            |            |            |             | 1.38                                             |            |            |          |
| 102657  | Cd276     | CD276 antigen                                                                    | 1             |           |             |            |            |            |             | 1.38                                             |            |            |          |
| 381903  | Alg8      | asparagine-linked glycosylation 8 homolog (yeast, alpha-1,3-glucosyltransferase) | 1             |           |             |            |            |            |             | 1.37                                             |            |            |          |
| 214855  | Arid5a    | AT rich interactive domain 5A (MRF1-like)                                        | 1             |           |             |            |            |            |             | 1.37                                             |            |            |          |
| 98711   | Rdh10     | retinol dehydrogenase 10 (all-trans)                                             | 1             |           |             |            |            |            |             | 1.35                                             |            |            |          |
| 70021   | Nt5dc2    | 5'-nucleotidase domain containing 2                                              | 1             |           |             |            |            |            |             | 1.34                                             |            |            |          |
| 225348  | Wdr36     | WD repeat domain 36                                                              | 1             |           |             |            |            |            |             | 1.33                                             |            |            |          |
| 75219   | Dusp18    | dual specificity phosphatase 18                                                  | 1             |           |             |            |            |            |             | 1.31                                             |            |            |          |
| 382639  | Zbtb42    | zinc finger and BTB domain containing 42                                         | 1             |           |             |            |            |            |             | 1.29                                             |            |            |          |
| 78339   | Tyh3      | tweety homolog 3 (Drosophila)                                                    | 1             |           |             |            |            |            |             | 1.29                                             |            |            |          |
| 23789   | Coro1b    | coronin, actin binding protein 1B                                                | 1             |           |             |            |            |            |             | 1.29                                             |            |            |          |
| 72400   | Pinx1     | PIN2/TERF1 interacting, telomerase inhibitor 1                                   | 1             |           |             |            |            |            |             | 1.29                                             |            |            |          |
| 14791   | Emg1      | EMG1 nucleolar protein homolog (S. cerevisiae)                                   | 1             |           |             |            |            |            |             | 1.28                                             |            |            |          |
| 22042   | Tfrc      | transferrin receptor                                                             | 1             |           |             |            |            |            |             | 1.28                                             | 2          | 1.5        | 0.46     |
| 20529   | Slc31a1   | solute carrier family 31, member 1                                               | 1             |           |             |            |            |            |             | 1.28                                             |            |            |          |
| 15374   | Hn1       | hematological and neurological expressed sequence 1                              | 1             |           |             |            |            |            |             | 1.27                                             |            |            |          |
| 12496   | Entpd2    | ectonucleoside triphosphate diphosphohydrolase 2                                 | 1             |           |             |            |            |            |             | 1.27                                             |            |            |          |
| 59126   | Nek6      | NIMA (never in mitosis gene a)-related expressed kinase 6                        | 1             |           |             |            |            |            |             | 1.26                                             |            |            |          |
| 18830   | Pltp      | phospholipid transfer protein                                                    | 1             |           |             |            |            |            |             | 1.26                                             | 9          | 78.9       | 1.71E-13 |
| 54357   | Epb4.114b | erythrocyte protein band 4.1-like 4b                                             | 1             |           |             |            |            |            |             | 1.26                                             |            |            |          |
| 57344   | As3mt     | arsenic (+3 oxidation state) methyltransferase                                   | 1             |           |             |            |            |            |             | 1.25                                             |            |            |          |
| 68079   | Pdcd2l    | programmed cell death 2-like                                                     | 1             |           |             |            |            |            |             | 1.25                                             |            |            |          |
| 21853   | Timeless  | timeless homolog (Drosophila)                                                    | 1             |           |             |            |            |            |             | 1.24                                             |            |            |          |
| 57912   | Cdc42se1  | CDC42 small effector 1                                                           | 1             |           |             |            |            |            |             | 1.24                                             |            |            |          |
| 66054   | Cndp2     | CNDP dipeptidase 2 (metallopeptidase M20 family)                                 | 1             |           |             |            |            |            |             | 1.23                                             |            |            |          |
| 56187   | RabggtA   | Rab geranylgeranyl transferase, a subunit                                        | 1             |           |             |            |            |            |             | 1.22                                             |            |            |          |
| 26987   | Eif4e2    | eukaryotic translation initiation factor 4E member 2                             | 1             |           |             |            |            |            |             | 1.22                                             |            |            |          |
| 21848   | Trim24    | tripartite motif-containing 24                                                   | 1             |           |             |            |            |            |             | 1.21                                             |            |            |          |
| 107045  | Lars      | leucyl-tRNA synthetase                                                           | 1             |           |             |            |            |            |             | 1.19                                             |            |            |          |
| 14466   | Gba       | glucosidase, beta, acid                                                          | 1             |           |             |            |            |            |             | 1.18                                             |            |            |          |
| 67443   | Map1c3b   | microtubule-associated protein 1 light chain 3 beta                              | 1             |           |             |            |            |            |             | -1.12                                            |            |            |          |
| 68024   | Hist1h2bc | histone cluster 1, H2bc                                                          | 1             |           |             |            |            |            |             | -1.14                                            |            |            |          |
| 68943   | Pink1     | PTEN induced putative kinase 1                                                   | 1             |           |             |            |            |            |             | -1.14                                            |            |            |          |
| 12955   | Cryab     | crystallin, alpha B                                                              | 1             |           |             |            |            |            |             | -1.14                                            |            |            |          |
| 13602   | Sparcl1   | SPARC-like 1                                                                     | 1             |           |             |            |            |            |             | -1.15                                            |            |            |          |
| 56044   | Rala      | v-ral simian leukemia viral oncogene homolog A (ras related)                     | 1             |           |             |            |            |            |             | -1.16                                            |            |            |          |
| 11518   | Add1      | adducin 1 (alpha)                                                                | 1             |           |             |            |            |            |             | -1.16                                            |            |            |          |
| 102866  | Pls3      | plastin 3 (T-isoform)                                                            | 1             |           |             |            |            |            |             | -1.16                                            |            |            |          |
| 53328   | Pgrmc1    | progesterone receptor membrane component 1                                       | 1             |           |             |            |            |            |             | -1.16                                            | 1          | 10.7       | 0.16     |
| 20742   | Spnb2     | spectrin beta 2                                                                  | 1             |           |             |            |            |            |             | -1.17                                            |            |            |          |
| 19247   | Ptpn11    | protein tyrosine phosphatase, non-receptor type 11                               | 1             |           |             |            |            |            |             | -1.18                                            |            |            |          |
| 215114  | Hip1      | huntingtin interacting protein 1                                                 | 1             |           |             |            |            |            |             | -1.19                                            |            |            |          |
| 432467  | Hnrnp3    | heterogeneous nuclear ribonucleoprotein H3                                       | 1             |           |             |            |            |            |             | -1.19                                            |            |            |          |
| 12741   | Cldn5     | claudin 5                                                                        | 1             |           |             |            |            |            |             | -1.20                                            |            |            |          |
| 18027   | Nfia      | nuclear factor I/A                                                               | 1             |           |             |            |            |            |             | -1.20                                            |            |            |          |
| 17988   | NdrG1     | N-myc downstream regulated gene 1                                                | 1             |           |             |            |            |            |             | -1.21                                            |            |            |          |
| 15511   | Hspa1b    | heat shock protein 1B                                                            | 1             |           |             |            |            |            |             | -1.22                                            |            |            |          |
| 16573   | Kif5b     | kinesin family member 5B                                                         | 1             |           |             |            |            |            |             | -1.23                                            | 1          | 8.2        | 0.19     |
| 54189   | Rabep1    | rabaptin, RAB GTPase binding effector protein 1                                  | 1             |           |             |            |            |            |             | -1.23                                            |            |            |          |
| 226352  | Epb4.115  | erythrocyte protein band 4.1-like 5                                              | 1             |           |             |            |            |            |             | -1.23                                            |            |            |          |
| 56248   | Ak3       | adenylate kinase 3                                                               | 1             |           |             |            |            |            |             | -1.23                                            |            |            |          |
| 19285   | Ptfr      | polymerase I and transcript release factor                                       | 1             |           |             |            |            |            |             | -1.23                                            |            |            |          |
| 63985   | Gmfb      | glia maturation factor, beta                                                     | 1             |           |             |            |            |            |             | -1.23                                            |            |            |          |
| 26400   | Map2k7    | mitogen-activated protein kinase kinase 7                                        | 1             |           |             |            |            |            |             | -1.23                                            |            |            |          |
| 22026   | Nr2c2     | nuclear receptor subfamily 2, group C, member 2                                  | 1             |           |             |            |            |            |             | -1.23                                            |            |            |          |
| 20362   | Sept8     | septin 8                                                                         | 1             |           |             |            |            |            |             | -1.23                                            |            |            |          |
| 207375  | Fam120c   | family with sequence similarity 120, member C                                    | 1             |           |             |            |            |            |             | -1.24                                            |            |            |          |
| 73569   | Vgll3     | vestigial like 3 (Drosophila)                                                    | 1             |           |             |            |            |            |             | -1.24                                            |            |            |          |
| 15529   | Sdc2      | syndecan 2                                                                       | 1             |           |             |            |            |            |             | -1.25                                            |            |            |          |
| 319845  | Bbs9      | Bardet-Biedl syndrome 9 (human)                                                  | 1             |           |             |            |            |            |             | -1.25                                            | 1          | 7.8        | 0.19     |
| 67075   | Magt1     | magnesium transporter 1                                                          | 1             |           |             |            |            |            |             | -1.25                                            |            |            |          |
| 77976   | Nuak1     | NUAK family, SNF1-like kinase, 1                                                 | 1             |           |             |            |            |            |             | -1.25                                            |            |            |          |
| 74159   | Acbd5     | acyl-Coenzyme A binding domain containing 5                                      | 1             |           |             |            |            |            |             | -1.25                                            |            |            |          |
| 22253   | Unc5c     | unc-5 homolog C (C. elegans)                                                     | 1             |           |             |            |            |            |             | -1.26                                            |            |            |          |
| 16974   | Lrp6      | low density lipoprotein receptor-related protein 6                               | 1             |           |             |            |            |            |             | -1.26                                            |            |            |          |
| 24017   | Rnf13     | ring finger protein 13                                                           | 1             |           |             |            |            |            |             | -1.26                                            |            |            |          |

| Gene ID   | Symbol        | Description                                                               | DEG/Set count | 2mWT_2mKO | 20mWT_20mKO | 2mKO_20mKO | 2mWT_20mWT | 2mWT_30mWT | 20mWT_30mWT | Literature-Mining (Aging-Cholesterol literature) |            |            |
|-----------|---------------|---------------------------------------------------------------------------|---------------|-----------|-------------|------------|------------|------------|-------------|--------------------------------------------------|------------|------------|
|           |               |                                                                           |               | 9         | 230         | 406        | 48         | 1904       | 1157        | #Paper                                           | Enrichment | BH P-value |
| 11490     | Adam15        | a disintegrin and metallopeptidase domain 15 (metargidin)                 | 1             |           |             |            |            |            | -1.26       |                                                  |            |            |
| 68121     | Cep70         | centrosomal protein 70                                                    | 1             |           |             |            |            |            | -1.27       |                                                  |            |            |
| 22720     | Zfp62         | zinc finger protein 62                                                    | 1             |           |             |            |            |            | -1.27       |                                                  |            |            |
| 13591     | Ebf1          | early B-cell factor 1                                                     | 1             |           |             |            |            |            | -1.27       |                                                  |            |            |
| 72145     | Wdfy3         | WD repeat and FYVE domain containing 3                                    | 1             |           |             |            |            |            | -1.27       |                                                  |            |            |
| 50781     | Dkk3          | dickkopf homolog 3 (Xenopus laevis)                                       | 1             |           |             |            |            |            | -1.27       | 1                                                | 29.2       | 0.08       |
| 21872     | Tjp1          | tight junction protein 1                                                  | 1             |           |             |            |            |            | -1.27       | 1                                                | 1.8        | 0.48       |
| 71069     | Stox2         | storkhead box 2                                                           | 1             |           |             |            |            |            | -1.27       |                                                  |            |            |
| 53814     | Oaz3          | ornithine decarboxylase antizyme 3                                        | 1             |           |             |            |            |            | -1.27       |                                                  |            |            |
| 12305     | Ddr1          | discoidin domain receptor family, member 1                                | 1             |           |             |            |            |            | -1.28       |                                                  |            |            |
| 56274     | Stk3          | serine/threonine kinase 3 (Ste20, yeast homolog)                          | 1             |           |             |            |            |            | -1.28       |                                                  |            |            |
| 227399    | Ppip5k2       | diphosphoinositol pentakisphosphate kinase 2                              | 1             |           |             |            |            |            | -1.28       |                                                  |            |            |
| 114713    | Rasa2         | RAS p21 protein activator 2                                               | 1             |           |             |            |            |            | -1.28       |                                                  |            |            |
| 18139     | Zfml          | zinc finger, matrin-like                                                  | 1             |           |             |            |            |            | -1.28       |                                                  |            |            |
| 270035    | Letm2         | leucine zipper-EF-hand containing transmembrane protein 2                 | 1             |           |             |            |            |            | -1.28       |                                                  |            |            |
| 106931    | Kctd1         | potassium channel tetramerisation domain containing 1                     | 1             |           |             |            |            |            | -1.29       |                                                  |            |            |
| 229542    | Gatad2b       | GATA zinc finger domain containing 2B                                     | 1             |           |             |            |            |            | -1.29       |                                                  |            |            |
| 17311     | Kitl          | kit ligand                                                                | 1             |           |             |            |            |            | -1.29       | 1                                                | 0.6        | 1.01       |
| 227737    | Fam129b       | family with sequence similarity 129, member B                             | 1             |           |             |            |            |            | -1.29       |                                                  |            |            |
| 78619     | Zfp449        | zinc finger protein 449                                                   | 1             |           |             |            |            |            | -1.29       |                                                  |            |            |
| 270627    | Taf1          | TAF1 RNA polymerase II, TATA box binding protein (TBP)-associated factor  | 1             |           |             |            |            |            | -1.30       |                                                  |            |            |
| 319922    | Vwc2          | von Willebrand factor C domain containing 2                               | 1             |           |             |            |            |            | -1.30       |                                                  |            |            |
| 71389     | Chd6          | chromodomain helicase DNA binding protein 6                               | 1             |           |             |            |            |            | -1.30       |                                                  |            |            |
| 75415     | Arhgap12      | Rho GTPase activating protein 12                                          | 1             |           |             |            |            |            | -1.30       |                                                  |            |            |
| 19317     | Qk            | quaking                                                                   | 1             |           |             |            |            |            | -1.31       |                                                  |            |            |
| 109624    | Cald1         | caldesmon 1                                                               | 1             |           |             |            |            |            | -1.31       |                                                  |            |            |
| 215789    | Phactr2       | phosphatase and actin regulator 2                                         | 1             |           |             |            |            |            | -1.31       |                                                  |            |            |
| 99929     | Tiparp        | TCDD-inducible poly(ADP-ribose) polymerase                                | 1             |           |             |            |            |            | -1.31       | 1                                                | 2.6        | 0.39       |
| 232813    | Shisa7        | shisa homolog 7 (Xenopus laevis)                                          | 1             |           |             |            |            |            | -1.32       |                                                  |            |            |
| 14265     | Fmr1          | fragile X mental retardation syndrome 1 homolog                           | 1             |           |             |            |            |            | -1.33       |                                                  |            |            |
| 13844     | Ephb2         | Eph receptor B2                                                           | 1             |           |             |            |            |            | -1.33       |                                                  |            |            |
| 76594     | Dnajc18       | DnaJ (Hsp40) homolog, subfamily C, member 18                              | 1             |           |             |            |            |            | -1.34       |                                                  |            |            |
| 320234    | Ccdc66        | coiled-coil domain containing 66                                          | 1             |           |             |            |            |            | -1.34       |                                                  |            |            |
| 54678     | Zfp108        | zinc finger protein 108                                                   | 1             |           |             |            |            |            | -1.34       |                                                  |            |            |
| 218214    | Kdm1b         | lysine (K)-specific demethylase 1B                                        | 1             |           |             |            |            |            | -1.35       |                                                  |            |            |
| 23797     | Akt3          | thymoma viral proto-oncogene 3                                            | 1             |           |             |            |            |            | -1.35       |                                                  |            |            |
| 97440     | B3gnt9-ps     | UDP-GlcNAc:betaGal beta-1,3-N-acetylglucosaminyltransferase 9, pseudogene | 1             |           |             |            |            |            | -1.36       |                                                  |            |            |
| 67420     | Far1          | fatty acyl CoA reductase 1                                                | 1             |           |             |            |            |            | -1.36       |                                                  |            |            |
| 19659     | Rbp1          | retinol binding protein 1, cellular                                       | 1             |           |             |            |            |            | -1.36       |                                                  |            |            |
| 57276     | Vsig2         | V-set and immunoglobulin domain containing 2                              | 1             |           |             |            |            |            | -1.36       |                                                  |            |            |
| 76453     | Prss23        | protease, serine, 23                                                      | 1             |           |             |            |            |            | -1.37       |                                                  |            |            |
| 72599     | Pdia5         | protein disulfide isomerase associated 5                                  | 1             |           |             |            |            |            | -1.37       |                                                  |            |            |
| 69601     | Dab2ip        | disabled homolog 2 (Drosophila) interacting protein                       | 1             |           |             |            |            |            | -1.37       |                                                  |            |            |
| 16779     | Lamb2         | laminin, beta 2                                                           | 1             |           |             |            |            |            | -1.37       |                                                  |            |            |
| 329152    | Hecw2         | HECT, C2 and WW domain containing E3 ubiquitin protein ligase 2           | 1             |           |             |            |            |            | -1.37       |                                                  |            |            |
| 233863    | Gtf3c1        | general transcription factor III C 1                                      | 1             |           |             |            |            |            | -1.37       |                                                  |            |            |
| 22141     | Tub           | tubby candidate gene                                                      | 1             |           |             |            |            |            | -1.38       |                                                  |            |            |
| 83486     | Rbm5          | RNA binding motif protein 5                                               | 1             |           |             |            |            |            | -1.38       |                                                  |            |            |
| 11819     | Nr2f2         | nuclear receptor subfamily 2, group F, member 2                           | 1             |           |             |            |            |            | -1.38       |                                                  |            |            |
| 16011     | Igfbp5        | insulin-like growth factor binding protein 5                              | 1             |           |             |            |            |            | -1.38       |                                                  |            |            |
| 18008     | Nes           | nestin                                                                    | 1             |           |             |            |            |            | -1.38       | 1                                                | 1.5        | 0.55       |
| 100503827 | 2010012P19Rik | RIKEN cDNA 2010012P19 gene                                                | 1             |           |             |            |            |            | -1.39       |                                                  |            |            |
| 230959    | Ajap1         | adherens junction associated protein 1                                    | 1             |           |             |            |            |            | -1.39       |                                                  |            |            |
| 12628     | Cfh           | complement component factor h                                             | 1             |           |             |            |            |            | -1.40       | 2                                                | 4          | 0.16       |
| 18798     | Plcb4         | phospholipase C, beta 4                                                   | 1             |           |             |            |            |            | -1.40       |                                                  |            |            |
| 108897    | Aif1l         | allograft inflammatory factor 1-like                                      | 1             |           |             |            |            |            | -1.41       |                                                  |            |            |
| 15424     | Hoxc5         | homeobox C5                                                               | 1             |           |             |            |            |            | -1.42       |                                                  |            |            |
| 18654     | Pgf           | placental growth factor                                                   | 1             |           |             |            |            |            | -1.43       | 1                                                | 2.6        | 0.39       |
| 73086     | Rps6ka5       | ribosomal protein S6 kinase, polypeptide 5                                | 1             |           |             |            |            |            | -1.43       |                                                  |            |            |
| 72656     | Ints8         | integrator complex subunit 8                                              | 1             |           |             |            |            |            | -1.43       |                                                  |            |            |
| 381157    | Greb1l        | growth regulation by estrogen in breast cancer-like                       | 1             |           |             |            |            |            | -1.44       |                                                  |            |            |
| 71163     | Zfp626        | zinc finger protein 626                                                   | 1             |           |             |            |            |            | -1.44       |                                                  |            |            |
| 380928    | Lmo7          | LIM domain only 7                                                         | 1             |           |             |            |            |            | -1.44       |                                                  |            |            |
| 26568     | Slc27a3       | solute carrier family 27 (fatty acid transporter), member 3               | 1             |           |             |            |            |            | -1.44       |                                                  |            |            |
| 14239     | Foxs1         | forkhead box S1                                                           | 1             |           |             |            |            |            | -1.44       |                                                  |            |            |
| 24001     | Tiam2         | T-cell lymphoma invasion and metastasis 2                                 | 1             |           |             |            |            |            | -1.47       |                                                  |            |            |
| 16597     | Klf12         | Kruppel-like factor 12                                                    | 1             |           |             |            |            |            | -1.47       |                                                  |            |            |
| 227545    | 5430407P10Rik | RIKEN cDNA 5430407P10 gene                                                | 1             |           |             |            |            |            | -1.47       |                                                  |            |            |
| 71355     | Col24a1       | collagen, type XXIV, alpha 1                                              | 1             |           |             |            |            |            | -1.48       |                                                  |            |            |
| 69551     | 2310022B05Rik | RIKEN cDNA 2310022B05 gene                                                | 1             |           |             |            |            |            | -1.49       |                                                  |            |            |
| 67573     | Loxl4         | lysyl oxidase-like 4                                                      | 1             |           |             |            |            |            | -1.49       |                                                  |            |            |
| 107250    | Kazald1       | Kazal-type serine peptidase inhibitor domain 1                            | 1             |           |             |            |            |            | -1.50       |                                                  |            |            |

| Gene ID   | Symbol        | Description                                                                        | DEG/Set count | 2mWT_2mKO | 20mWT_20mKO | 2mKO_20mKO | 2mWT_20mWT | 2mWT_30mWT | 20mWT_30mWT | Literature-Mining (Aging-Cholesterol literature) |            |            |          |
|-----------|---------------|------------------------------------------------------------------------------------|---------------|-----------|-------------|------------|------------|------------|-------------|--------------------------------------------------|------------|------------|----------|
|           |               |                                                                                    |               | 9         | 230         | 406        | 48         | 1904       | 1157        | #Paper                                           | Enrichment | BH P-value |          |
| 170761    | Pdzd3         | PDZ domain containing 3                                                            | 1             |           |             |            |            |            |             | -1.50                                            |            |            |          |
| 329739    | Fam102b       | family with sequence similarity 102, member B                                      | 1             |           |             |            |            |            |             | -1.51                                            |            |            |          |
| 100504017 | LOC100504017  | uncharacterized LOC100504017                                                       | 1             |           |             |            |            |            |             | -1.52                                            |            |            |          |
| 207596    | Thsd4         | thrombospondin, type I, domain containing 4                                        | 1             |           |             |            |            |            |             | -1.52                                            |            |            |          |
| 66175     | Mustn1        | musculoskeletal, embryonic nuclear protein 1                                       | 1             |           |             |            |            |            |             | -1.52                                            |            |            |          |
| 80883     | Ntng1         | netrin G1                                                                          | 1             |           |             |            |            |            |             | -1.52                                            |            |            |          |
| 213556    | Plekhh2       | pleckstrin homology domain containing, family H (with MyTH4 domain) member 2       | 1             |           |             |            |            |            |             | -1.55                                            |            |            |          |
| 14234     | Foxc2         | forkhead box C2                                                                    | 1             |           |             |            |            |            |             | -1.55                                            |            |            |          |
| 233071    | Arhgap33      | Rho GTPase activating protein 33                                                   | 1             |           |             |            |            |            |             | -1.56                                            |            |            |          |
| 19041     | Ppl           | periplakin                                                                         | 1             |           |             |            |            |            |             | -1.56                                            |            |            |          |
| 68097     | Dynll2        | dynein light chain LC8-type 2                                                      | 1             |           |             |            |            |            |             | -1.57                                            |            |            |          |
| 13592     | Ebf2          | early B-cell factor 2                                                              | 1             |           |             |            |            |            |             | -1.58                                            |            |            |          |
| 13616     | Edn3          | endothelin 3                                                                       | 1             |           |             |            |            |            |             | -1.58                                            | 1          | 2.4        | 0.41     |
| 109135    | Plekha5       | pleckstrin homology domain containing, family A member 5                           | 1             |           |             |            |            |            |             | -1.59                                            |            |            |          |
| 18049     | Ngf           | nerve growth factor                                                                | 1             |           |             |            |            |            |             | -1.60                                            | 5          | 1.5        | 0.46     |
| 234365    | Yjefn3        | Yjef N-terminal domain containing 3                                                | 1             |           |             |            |            |            |             | -1.60                                            |            |            |          |
| 216166    | Plk5          | polo-like kinase 5 (Drosophila)                                                    | 1             |           |             |            |            |            |             | -1.61                                            |            |            |          |
| 217480    | Dgkb          | diacylglycerol kinase, beta                                                        | 1             |           |             |            |            |            |             | -1.63                                            |            |            |          |
| 72168     | Aifm3         | apoptosis-inducing factor, mitochondrion-associated 3                              | 1             |           |             |            |            |            |             | -1.63                                            |            |            |          |
| 218343    | Ttc37         | tetratricopeptide repeat domain 37                                                 | 1             |           |             |            |            |            |             | -1.64                                            |            |            |          |
| 69479     | 1700029J07Rik | RIKEN cDNA 1700029J07 gene                                                         | 1             |           |             |            |            |            |             | -1.64                                            |            |            |          |
| 279653    | Pcdh19        | protocadherin 19                                                                   | 1             |           |             |            |            |            |             | -1.65                                            |            |            |          |
| 75571     | Spata9        | spermatogenesis associated 9                                                       | 1             |           |             |            |            |            |             | -1.65                                            |            |            |          |
| 15165     | Hcn1          | hyperpolarization-activated, cyclic nucleotide-gated K+ 1                          | 1             |           |             |            |            |            |             | -1.66                                            |            |            |          |
| 243659    | Styk1         | serine/threonine/tyrosine kinase 1                                                 | 1             |           |             |            |            |            |             | -1.67                                            |            |            |          |
| 12577     | Cdkn1c        | cyclin-dependent kinase inhibitor 1C (P57)                                         | 1             |           |             |            |            |            |             | -1.68                                            |            |            |          |
| 98845     | Eps8l2        | EPS8-like 2                                                                        | 1             |           |             |            |            |            |             | -1.72                                            |            |            |          |
| 105387    | Akr1c14       | aldo-keto reductase family 1, member C14                                           | 1             |           |             |            |            |            |             | -1.72                                            |            |            |          |
| 219149    | Xkr6          | X Kell blood group precursor related family member 6 homolog                       | 1             |           |             |            |            |            |             | -1.72                                            |            |            |          |
| 67866     | Wfdc1         | WAP four-disulfide core domain 1                                                   | 1             |           |             |            |            |            |             | -1.73                                            |            |            |          |
| 30785     | Ctnnbp2       | cortactin binding protein 2                                                        | 1             |           |             |            |            |            |             | -1.74                                            |            |            |          |
| 320878    | Mical2        | microtubule associated monooxygenase, calponin and LIM domain containing 2         | 1             |           |             |            |            |            |             | -1.75                                            |            |            |          |
| 71406     | 5430416O09Rik | RIKEN cDNA 5430416O09 gene                                                         | 1             |           |             |            |            |            |             | -1.76                                            |            |            |          |
| 103841    | Cuedc1        | CUE domain containing 1                                                            | 1             |           |             |            |            |            |             | -1.76                                            |            |            |          |
| 396184    | Flrt1         | fibronectin leucine rich transmembrane protein 1                                   | 1             |           |             |            |            |            |             | -1.76                                            |            |            |          |
| 213019    | Pdlim2        | PDZ and LIM domain 2                                                               | 1             |           |             |            |            |            |             | -1.80                                            |            |            |          |
| 70546     | Zdhhc2        | zinc finger, DHHC domain containing 2                                              | 1             |           |             |            |            |            |             | -1.82                                            |            |            |          |
| 97848     | Serpinb6c     | serine (or cysteine) peptidase inhibitor, clade B, member 6c                       | 1             |           |             |            |            |            |             | -1.86                                            |            |            |          |
| 232599    | Gm4876        | predicted gene 4876                                                                | 1             |           |             |            |            |            |             | -1.90                                            |            |            |          |
| 24084     | Tekt2         | tektin 2                                                                           | 1             |           |             |            |            |            |             | -1.91                                            |            |            |          |
| 76886     | Fam81a        | family with sequence similarity 81, member A                                       | 1             |           |             |            |            |            |             | -1.94                                            |            |            |          |
| 14428     | Galr2         | galanin receptor 2                                                                 | 1             |           |             |            |            |            |             | -1.95                                            |            |            |          |
| 110310    | Krt7          | keratin 7                                                                          | 1             |           |             |            |            |            |             | -1.95                                            |            |            |          |
| 71897     | Lypd6b        | LY6/PLAUR domain containing 6B                                                     | 1             |           |             |            |            |            |             | -2.00                                            |            |            |          |
| 21954     | Tnni3         | troponin I, cardiac 3                                                              | 1             |           |             |            |            |            |             | -2.03                                            |            |            |          |
| 13168     | Ddil5         | diazepam binding inhibitor-like 5                                                  | 1             |           |             |            |            |            |             | -2.25                                            |            |            |          |
| 17898     | Myl7          | myosin, light polypeptide 7, regulatory                                            | 1             |           |             |            |            |            |             | -2.29                                            |            |            |          |
| 11807     | Apoa2         | apolipoprotein A-II                                                                | 1             |           |             |            |            |            |             | -2.49                                            | 22         | 253.9      | 3.59E-43 |
| 18979     | Pon1          | paraoxonase 1                                                                      | 1             |           |             |            |            | -3.79      |             |                                                  | 29         | 57.3       | 9.62E-39 |
| 13070     | Cyp11a1       | cytochrome P450, family 11, subfamily a, polypeptide 1                             | 1             |           | 1.54        |            |            |            |             |                                                  | 23         | 66.7       | 2.62E-32 |
| 22329     | Vcam1         | vascular cell adhesion molecule 1                                                  | 1             |           |             |            |            | 2.37       |             |                                                  | 12         | 6.7        | 4.25E-06 |
| 11815     | Apod          | apolipoprotein D                                                                   | 1             |           |             |            |            | 1.17       |             |                                                  | 4          | 54.1       | 1.21E-05 |
| 22041     | Trf           | transferrin                                                                        | 1             |           |             |            |            | 1.55       |             |                                                  | 16         | 4          | 4.30E-05 |
| 17187     | Max           | Max protein                                                                        | 1             |           |             |            |            | 1.51       |             |                                                  | 3          | 54.7       | 2.15E-04 |
| 231162    | Cyt11         | cytokine-like 1                                                                    | 1             |           |             |            |            | 2.00       |             |                                                  | 3          | 51.5       | 2.51E-04 |
| 11461     | Actb          | actin, beta                                                                        | 1             |           |             |            |            | 1.46       |             |                                                  | 8          | 6.8        | 2.58E-04 |
| 15925     | Ide           | insulin degrading enzyme                                                           | 1             |           |             |            |            | 1.77       |             |                                                  | 3          | 24.1       | 1.86E-03 |
| 110460    | Acat2         | acetyl-Coenzyme A acetyltransferase 2                                              | 1             |           |             |            |            | -1.30      |             |                                                  | 2          | 75         | 2.20E-03 |
| 64383     | Sirt2         | sirtuin 2 (silent mating type information regulation 2, homolog) 2 (S. cerevisiae) | 1             |           |             |            |            | -1.15      |             |                                                  | 3          | 19.6       | 3.18E-03 |
| 72061     | 201011101Rik  | RIKEN cDNA 201011101 gene                                                          | 1             |           |             |            |            | 1.56       |             |                                                  | 2          | 58         | 3.45E-03 |
| 14580     | Gfap          | glial fibrillary acidic protein                                                    | 1             |           |             |            |            | 6.59       |             |                                                  | 10         | 3.6        | 3.76E-03 |
| 16987     | Lss           | lanosterol synthase                                                                | 1             |           |             |            |            | -2.75      |             |                                                  | 2          | 45.6       | 0.01     |
| 21898     | Tlr4          | toll-like receptor 4                                                               | 1             |           |             |            |            | 1.53       |             |                                                  | 7          | 4.4        | 0.01     |
| 22122     | Tsta3         | tissue specific transplantation antigen P35B                                       | 1             |           |             |            |            | 1.25       |             |                                                  | 1          | 680.9      | 0.01     |
| 13010     | Cst3          | cystatin C                                                                         | 1             |           |             |            |            | 1.14       |             |                                                  | 4          | 7.7        | 0.01     |
| 17855     | Mvk           | mevalonate kinase                                                                  | 1             |           |             |            |            | -1.43      |             |                                                  | 2          | 27         | 0.01     |
| 16905     | Lmna          | lamin A                                                                            | 1             |           |             |            |            | 1.15       |             |                                                  | 3          | 9.9        | 0.02     |
| 56742     | Psrc1         | proline/serine-rich coiled-coil 1                                                  | 1             |           |             |            |            | 3.59       |             |                                                  | 1          | 194.6      | 0.02     |
| 14812     | Grin2b        | glutamate receptor, ionotropic, NMDA2B (epsilon 2)                                 | 1             |           |             |            |            | -1.64      |             |                                                  | 3          | 7.8        | 0.03     |
| 20753     | Sprr1a        | small proline-rich protein 1A                                                      | 1             |           |             |            |            | 3.75       |             |                                                  | 1          | 131.8      | 0.03     |
| 20619     | Snap23        | synaptosomal-associated protein 23                                                 | 1             |           |             |            |            | 1.81       |             |                                                  | 2          | 14.4       | 0.03     |
| 54326     | Elovl2        | elongation of very long chain fatty acids (FEN1/Elo2, SUR4/Elo3, yeast)-like 2     | 1             |           | -2.35       |            |            |            |             |                                                  | 1          | 107.5      | 0.03     |

| Gene ID | Symbol   | Description                                                                 | DEG/Set count | 2mWT_2mKO | 20mWT_20mKO | 2mKO_20mKO | 2mWT_20mWT | 2mWT_30mWT | 20mWT_30mWT | Literature-Mining (Aging-Cholesterol literature) |            |            |      |
|---------|----------|-----------------------------------------------------------------------------|---------------|-----------|-------------|------------|------------|------------|-------------|--------------------------------------------------|------------|------------|------|
|         |          |                                                                             |               | 9         | 230         | 406        | 48         | 1904       | 1157        | #Paper                                           | Enrichment | BH P-value |      |
| 330064  | Slc5a6   | solute carrier family 5 (sodium-dependent vitamin transporter), member 6    | 1             |           | 1.42        |            |            |            |             |                                                  | 1          | 104.8      | 0.03 |
| 19655   | Rbmx     | RNA binding motif protein, X chromosome                                     | 1             |           |             |            |            | -1.28      |             |                                                  | 1          | 80.1       | 0.04 |
| 20657   | Sod3     | superoxide dismutase 3, extracellular                                       | 1             |           |             |            |            | -1.36      |             |                                                  | 2          | 11         | 0.05 |
| 14751   | Gpi1     | glucose phosphate isomerase 1                                               | 1             |           |             |            |            | 1.25       |             |                                                  | 4          | 4          | 0.06 |
| 15108   | Hsd17b10 | hydroxysteroid (17-beta) dehydrogenase 10                                   | 1             |           |             |            |            | -1.18      |             |                                                  | 1          | 48.1       | 0.06 |
| 26413   | Mapk1    | mitogen-activated protein kinase 1                                          | 1             |           |             |            |            | 1.42       |             |                                                  | 19         | 1.7        | 0.06 |
| 12827   | Col4a2   | collagen, type IV, alpha 2                                                  | 1             |           |             |            |            | -1.32      |             |                                                  | 1          | 44.4       | 0.06 |
| 18791   | Plat     | plasminogen activator, tissue                                               | 1             |           |             |            |            | 1.39       |             |                                                  | 9          | 2.2        | 0.07 |
| 13139   | Dgka     | diacylglycerol kinase, alpha                                                | 1             |           |             |            |            | -1.29      |             |                                                  | 1          | 37.1       | 0.07 |
| 50798   | Gne      | glucosamine                                                                 | 1             |           |             |            |            | -1.47      |             |                                                  | 1          | 31         | 0.08 |
| 59056   | Evc      | Ellis van Creveld gene homolog (human)                                      | 1             |           |             |            |            | -1.47      |             |                                                  | 1          | 25.4       | 0.09 |
| 105787  | Prkaa1   | protein kinase, AMP-activated, alpha 1 catalytic subunit                    | 1             |           |             |            |            | 2.03       |             |                                                  | 3          | 4.1        | 0.09 |
| 17295   | Met      | met proto-oncogene                                                          | 1             | -1.40     |             |            |            |            |             |                                                  | 6          | 2.4        | 0.09 |
| 18618   | Pemt     | phosphatidylethanolamine N-methyltransferase                                | 1             |           |             |            |            | -1.35      |             |                                                  | 1          | 22.4       | 0.10 |
| 65969   | Cubn     | cubilin (intrinsic factor-cobalamin receptor)                               | 1             |           |             |            |            | -1.35      |             |                                                  | 1          | 19.3       | 0.11 |
| 17873   | Gadd45b  | growth arrest and DNA-damage-inducible 45 beta                              | 1             |           |             |            |            | 1.52       |             |                                                  | 1          | 14.9       | 0.13 |
| 12476   | Cd151    | CD151 antigen                                                               | 1             |           |             |            |            | -1.14      |             |                                                  | 1          | 14.5       | 0.14 |
| 232345  | A2m      | alpha-2-macroglobulin                                                       | 1             |           |             |            |            | 1.47       |             |                                                  | 3          | 3.1        | 0.15 |
| 19288   | Ptx3     | pentraxin related gene                                                      | 1             |           |             |            |            | 1.82       |             |                                                  | 1          | 12.5       | 0.15 |
| 15213   | Hey1     | hairy/enhancer-of-split related with YRPW motif 1                           | 1             |           |             |            |            | 1.82       |             |                                                  | 1          | 11.7       | 0.15 |
| 13875   | Erf      | Ets2 repressor factor                                                       | 1             |           |             |            |            | 1.40       |             |                                                  | 1          | 11         | 0.16 |
| 217944  | Rapgef5  | Rap guanine nucleotide exchange factor (GEF) 5                              | 1             |           | -1.61       |            |            |            |             |                                                  | 1          | 10.7       | 0.16 |
| 12490   | Cd34     | CD34 antigen                                                                | 1             |           |             |            |            | -1.35      |             |                                                  | 1          | 0.2        | 0.17 |
| 109672  | Cyb5     | cytochrome b-5                                                              | 1             |           |             |            |            | -1.16      |             |                                                  | 2          | 3.7        | 0.18 |
| 15007   | H2-Q10   | histocompatibility 2, Q region locus 10                                     | 1             |           | 3.44        |            |            |            |             |                                                  | 3          | 0.4        | 0.18 |
| 20544   | Slc9a1   | solute carrier family 9 (sodium/hydrogen exchanger), member 1               | 1             |           |             |            |            | -1.36      |             |                                                  | 1          | 8.3        | 0.19 |
| 12309   | S100g    | S100 calcium binding protein G                                              | 1             |           |             |            |            | -1.74      |             |                                                  | 1          | 7.7        | 0.19 |
| 16391   | Irf9     | interferon regulatory factor 9                                              | 1             |           |             |            |            | 1.58       |             |                                                  | 1          | 7.4        | 0.20 |
| 27973   | Vkorc1   | vitamin K epoxide reductase complex, subunit 1                              | 1             |           |             |            |            | -1.22      |             |                                                  | 1          | 7.1        | 0.20 |
| 13019   | Ctf1     | cardiotrophin 1                                                             | 1             |           |             |            |            | -1.37      |             |                                                  | 1          | 5.9        | 0.23 |
| 20869   | Stk11    | serine/threonine kinase 11                                                  | 1             |           |             |            |            | 1.32       |             |                                                  | 1          | 5.6        | 0.24 |
| 22323   | Vasp     | vasodilator-stimulated phosphoprotein                                       | 1             |           |             |            |            | 1.82       |             |                                                  | 1          | 5.6        | 0.24 |
| 12868   | Cox8a    | cytochrome c oxidase, subunit VIIIa                                         | 1             |           |             |            |            | 1.23       |             |                                                  | 4          | 1.9        | 0.24 |
| 67126   | Atp5e    | ATP synthase, H+ transporting, mitochondrial F1 complex, epsilon subunit    | 1             |           |             |            |            | 1.10       |             |                                                  | 1          | 5.3        | 0.25 |
| 16728   | L1cam    | L1 cell adhesion molecule                                                   | 1             |           |             |            |            | 1.59       |             |                                                  | 1          | 5          | 0.26 |
| 15901   | Id1      | inhibitor of DNA binding 1                                                  | 1             |           |             |            |            | 1.33       |             |                                                  | 1          | 4.9        | 0.26 |
| 15528   | Hspe1    | heat shock protein 1 (chaperonin 10)                                        | 1             |           |             |            |            | 1.61       |             |                                                  | 1          | 4.6        | 0.27 |
| 12028   | Bax      | BCL2-associated X protein                                                   | 1             |           |             |            |            | 1.37       |             |                                                  | 1          | 0.3        | 0.35 |
| 21808   | Tgfb2    | transforming growth factor, beta 2                                          | 1             |           |             |            |            | 1.36       |             |                                                  | 1          | 2.5        | 0.40 |
| 12995   | Csnk2a1  | casein kinase 2, alpha 1 polypeptide                                        | 1             |           |             |            |            | 1.30       |             |                                                  | 1          | 2.3        | 0.42 |
| 13555   | E2f1     | E2F transcription factor 1                                                  | 1             |           |             |            |            | 1.47       |             |                                                  | 1          | 1.8        | 0.48 |
| 50873   | Park2    | Parkinson disease (autosomal recessive, juvenile) 2, parkin                 | 1             |           |             |            |            | -1.36      |             |                                                  | 1          | 1.7        | 0.51 |
| 19229   | Ptk2b    | PTK2 protein tyrosine kinase 2 beta                                         | 1             |           |             |            |            | 1.46       |             |                                                  | 1          | 1.5        | 0.55 |
| 14573   | Gdnf     | glial cell line derived neurotrophic factor                                 | 1             |           |             |            |            | 4.15       |             |                                                  | 1          | 1.3        | 0.58 |
| 15452   | Hprt     | hypoxanthine guanine phosphoribosyl transferase                             | 1             |           |             |            |            | 1.57       |             |                                                  | 1          | 1.3        | 0.59 |
| 18591   | Pdgfb    | platelet derived growth factor, B polypeptide                               | 1             |           |             |            |            | 1.45       |             |                                                  | 4          | 1.2        | 0.63 |
| 15567   | Slc6a4   | solute carrier family 6 (neurotransmitter transporter, serotonin), member 4 | 1             |           | 2.77        |            |            |            |             |                                                  | 1          | 1.1        | 0.65 |
| 12370   | Casp8    | caspase 8                                                                   | 1             |           |             |            |            | 2.63       |             |                                                  | 1          | 0.4        | 0.78 |
| 109648  | Npy      | neuropeptide Y                                                              | 1             |           |             |            |            | 3.60       |             |                                                  | 3          | 1.2        | 0.78 |
| 13361   | Dhfr     | dihydrofolate reductase                                                     | 1             |           |             |            |            | -1.36      |             |                                                  | 1          | 0.8        | 1.01 |
| 52696   | Zwint    | ZW10 interactor                                                             | 1             |           |             |            |            | 1.53       |             |                                                  |            |            |      |
| 229937  | Znhit6   | zinc finger, HIT type 6                                                     | 1             |           |             |            |            | -1.18      |             |                                                  |            |            |      |
| 100177  | Zmym6    | zinc finger, MYM-type 6                                                     | 1             |           |             |            |            | -1.31      |             |                                                  |            |            |      |
| 67785   | Zmym4    | zinc finger, MYM-type 4                                                     | 1             |           |             |            |            | -1.26      |             |                                                  |            |            |      |
| 74149   | Zfp946   | zinc finger protein 946                                                     | 1             |           |             |            |            | 1.84       |             |                                                  |            |            |      |
| 382019  | Zfp882   | zinc finger protein 882                                                     | 1             |           |             |            |            | -1.33      |             |                                                  |            |            |      |
| 408067  | Zfp874b  | zinc finger protein 874b                                                    | 1             |           |             |            |            | -1.40      |             |                                                  |            |            |      |
| 244216  | Zfp771   | zinc finger protein 771                                                     | 1             |           |             |            |            | -1.27      |             |                                                  |            |            |      |
| 233893  | Zfp764   | zinc finger protein 764                                                     | 1             |           |             |            |            | -1.48      |             |                                                  |            |            |      |
| 353310  | Zfp703   | zinc finger protein 703                                                     | 1             |           |             |            |            | 1.25       |             |                                                  |            |            |      |
| 22704   | Zfp46    | zinc finger protein 46                                                      | 1             |           |             |            |            | -1.29      |             |                                                  |            |            |      |
| 22701   | Zfp41    | zinc finger protein 41                                                      | 1             |           |             |            |            | -1.41      |             |                                                  |            |            |      |
| 57247   | Zfp276   | zinc finger protein (C2H2 type) 276                                         | 1             |           |             |            |            | -1.35      |             |                                                  |            |            |      |
| 232784  | Zfp212   | Zinc finger protein 212                                                     | 1             |           |             |            |            | -1.26      |             |                                                  |            |            |      |
| 22680   | Zfp207   | zinc finger protein 207                                                     | 1             |           |             |            |            | 1.83       |             |                                                  |            |            |      |
| 230162  | Zfp189   | zinc finger protein 189                                                     | 1             |           |             |            |            | 1.36       |             |                                                  |            |            |      |
| 72154   | Zfp157   | zinc finger protein 157                                                     | 1             |           |             |            |            | -1.31      |             |                                                  |            |            |      |
| 26465   | Zfp146   | zinc finger protein 146                                                     | 1             |           |             |            |            | 1.47       |             |                                                  |            |            |      |
| 243906  | Zfp14    | zinc finger protein 14                                                      | 1             |           |             |            |            | -1.51      |             |                                                  |            |            |      |
| 27801   | Zdhhc8   | zinc finger, DHHC domain containing 8                                       | 1             |           |             |            |            | -1.44      |             |                                                  |            |            |      |
| 72881   | Zdhhc4   | zinc finger, DHHC domain containing 4                                       | 1             |           |             |            |            | -1.31      |             |                                                  |            |            |      |
| 69035   | Zdhhc3   | zinc finger, DHHC domain containing 3                                       | 1             |           |             |            |            | -1.23      |             |                                                  |            |            |      |
| 20286   | Zc3h7b   | zinc finger CCCH type containing 7B                                         | 1             |           |             |            |            | -1.30      |             |                                                  |            |            |      |
| 237256  | Zc3h12d  | zinc finger CCCH type containing 12D                                        | 1             |           |             |            |            | 7.43       |             |                                                  |            |            |      |

| Gene ID   | Symbol    | Description                                                                                 | DEG/Set count | 2mWT_2mKO | 20mWT_20mKO | 2mKO_20mKO | 2mWT_20mWT | 2mWT_30mWT | 20mWT_30mWT | Literature-Mining (Aging-Cholesterol literature) |            |            |
|-----------|-----------|---------------------------------------------------------------------------------------------|---------------|-----------|-------------|------------|------------|------------|-------------|--------------------------------------------------|------------|------------|
|           |           |                                                                                             |               | 9         | 230         | 406        | 48         | 1904       | 1157        | #Paper                                           | Enrichment | BH P-value |
| 22627     | Ywhae     | tyrosine 3-monooxygenase/tryptophan 5-monooxygenase activation protein, epsilon polypeptide | 1             |           |             |            |            | -1.12      |             |                                                  |            |            |
| 229096    | Ythdf3    | YTH domain family 3                                                                         | 1             |           |             |            |            | 1.28       |             |                                                  |            |            |
| 213541    | Ythdf2    | YTH domain family 2                                                                         | 1             |           |             |            |            | 1.31       |             |                                                  |            |            |
| 66090     | Ypel3     | yippee-like 3 (Drosophila)                                                                  | 1             |           |             |            |            | -1.25      |             |                                                  |            |            |
| 77254     | Yif1b     | Yip1 interacting factor homolog B (S. cerevisiae)                                           | 1             |           |             |            |            | -1.32      |             |                                                  |            |            |
| 170745    | Xpnpep2   | X-prolyl aminopeptidase (aminopeptidase P) 2, membrane-bound                                | 1             |           |             |            |            | -2.00      |             |                                                  |            |            |
| 211652    | Wwc1      | WW, C2 and coiled-coil domain containing 1                                                  | 1             |           |             |            |            | -1.89      |             |                                                  |            |            |
| 68151     | Wls       | wntless homolog (Drosophila)                                                                | 1             |           |             |            |            | 1.38       |             |                                                  |            |            |
| 215280    | Wipf1     | WAS/WASL interacting protein family, member 1                                               | 1             |           |             |            |            | 1.58       |             |                                                  |            |            |
| 269633    | Wdr86     | WD repeat domain 86                                                                         | 1             |           |             |            |            | -1.66      |             |                                                  |            |            |
| 54636     | Wdr45     | WD repeat domain 45                                                                         | 1             |           |             |            |            | -1.31      |             |                                                  |            |            |
| 218460    | Wdr41     | WD repeat domain 41                                                                         | 1             |           |             |            |            | 1.48       |             |                                                  |            |            |
| 244484    | Wdr17     | WD repeat domain 17                                                                         | 1             |           |             |            |            | -1.39      |             |                                                  |            |            |
| 22381     | Wbp5      | WW domain binding protein 5                                                                 | 1             |           |             |            |            | 1.68       |             |                                                  |            |            |
| 233813    | Wwa3a     | von Willebrand factor A domain containing 3A                                                | 1             |           |             |            |            | -1.60      |             |                                                  |            |            |
| 26950     | Vsnl1     | visinin-like 1                                                                              | 1             |           | -3.10       |            |            |            |             |                                                  |            |            |
| 28084     | Vps25     | vacuolar protein sorting 25 (yeast)                                                         | 1             |           |             |            |            | 1.28       |             |                                                  |            |            |
| 22361     | Vnn1      | vanin 1                                                                                     | 1             |           |             |            |            | -2.10      |             |                                                  |            |            |
| 74199     | Vit       | vitrin                                                                                      | 1             |           |             |            |            | -2.25      |             |                                                  |            |            |
| 53620     | Vamp5     | vesicle-associated membrane protein 5                                                       | 1             |           |             |            |            | -1.47      |             |                                                  |            |            |
| 252870    | Usp7      | ubiquitin specific peptidase 7                                                              | 1             |           |             |            |            | 1.23       |             |                                                  |            |            |
| 78787     | Usp54     | ubiquitin specific peptidase 54                                                             | 1             |           |             |            |            | -1.50      |             |                                                  |            |            |
| 74841     | Usp38     | ubiquitin specific peptidase 38                                                             | 1             |           |             |            |            | 1.65       |             |                                                  |            |            |
| 170822    | Usp33     | ubiquitin specific peptidase 33                                                             | 1             |           |             |            |            | 1.48       |             |                                                  |            |            |
| 30940     | Usp25     | ubiquitin specific peptidase 25                                                             | 1             |           |             |            |            | 1.36       |             |                                                  |            |            |
| 14479     | Usp15     | ubiquitin specific peptidase 15                                                             | 1             |           |             |            |            | 1.34       |             |                                                  |            |            |
| 234395    | Ushbp1    | Usher syndrome 1C binding protein 1                                                         | 1             |           |             |            |            | -1.81      |             |                                                  |            |            |
| 67023     | Use1      | unconventional SNARE in the ER 1 homolog (S. cerevisiae)                                    | 1             |           |             |            |            | 1.24       |             |                                                  |            |            |
| 22249     | Unc13b    | unc-13 homolog B (C. elegans)                                                               | 1             |           |             |            |            | -1.63      |             |                                                  |            |            |
| 382018    | Unc13a    | unc-13 homolog A (C. elegans)                                                               | 1             |           | -1.70       |            |            |            |             |                                                  |            |            |
| 106840    | Unc119b   | unc-119 homolog B (C. elegans)                                                              | 1             |           |             |            |            | -1.26      |             |                                                  |            |            |
| 75089     | Uhrf1bp11 | UHRF1 (ICBP90) binding protein 1-like                                                       | 1             |           |             |            |            | 1.37       |             |                                                  |            |            |
| 66155     | Ufc1      | ubiquitin-fold modifier conjugating enzyme 1                                                | 1             |           |             |            |            | 1.24       |             |                                                  |            |            |
| 212190    | Ubxn10    | UBX domain protein 10                                                                       | 1             |           |             |            |            | -1.60      |             |                                                  |            |            |
| 68795     | Ubr3      | ubiquitin protein ligase E3 component n-recogin 3                                           | 1             |           |             |            |            | 1.31       |             |                                                  |            |            |
| 217342    | Ube2o     | ubiquitin-conjugating enzyme E2O                                                            | 1             |           |             |            |            | 1.75       |             |                                                  |            |            |
| 93765     | Ube2n     | ubiquitin-conjugating enzyme E2N                                                            | 1             |           | -1.62       |            |            |            |             |                                                  |            |            |
| 56791     | Ube2l6    | ubiquitin-conjugating enzyme E2L 6                                                          | 1             |           |             |            |            | 7.81       |             |                                                  |            |            |
| 56550     | Ube2d2    | ubiquitin-conjugating enzyme E2D 2                                                          | 1             |           | -1.16       |            |            |            |             |                                                  |            |            |
| 50493     | Txnrd1    | thioredoxin reductase 1                                                                     | 1             |           |             |            |            | 1.29       |             |                                                  |            |            |
| 52700     | Txndc17   | thioredoxin domain containing 17                                                            | 1             |           |             |            |            | 1.13       |             |                                                  |            |            |
| 22160     | Twist1    | twist homolog 1 (Drosophila)                                                                | 1             |           |             |            |            | -1.53      |             |                                                  |            |            |
| 68842     | Tulp4     | tubby like protein 4                                                                        | 1             |           |             |            |            | 1.32       |             |                                                  |            |            |
| 74711     | Tll9      | tubulin tyrosine ligase-like family, member 9                                               | 1             |           |             |            |            | -1.54      |             |                                                  |            |            |
| 67515     | Ttc33     | tetratricopeptide repeat domain 33                                                          | 1             |           |             |            |            | 1.43       |             |                                                  |            |            |
| 56496     | Tspan6    | tetraspanin 6                                                                               | 1             |           |             |            |            | -1.45      |             |                                                  |            |            |
| 74257     | Tspan17   | tetraspanin 17                                                                              | 1             |           |             |            |            | -1.37      |             |                                                  |            |            |
| 78829     | Tsc22d4   | TSC22 domain family, member 4                                                               | 1             |           |             |            |            | -1.29      |             |                                                  |            |            |
| 72033     | Tsc22d2   | TSC22 domain family, member 2                                                               | 1             |           |             |            |            | 1.30       |             |                                                  |            |            |
| 22368     | Trpv2     | transient receptor potential cation channel, subfamily V, member 2                          | 1             |           |             |            |            | 1.93       |             |                                                  |            |            |
| 28240     | Trpm2     | transient receptor potential cation channel, subfamily M, member 2                          | 1             |           |             |            |            | 1.48       |             |                                                  |            |            |
| 22065     | Trpc3     | transient receptor potential cation channel, subfamily C, member 3                          | 1             |           | -1.94       |            |            |            |             |                                                  |            |            |
| 229644    | Trim45    | tripartite motif-containing 45                                                              | 1             |           |             |            |            | -1.57      |             |                                                  |            |            |
| 20128     | Trim30a   | tripartite motif-containing 30A                                                             | 1             |           |             |            |            | 2.34       |             |                                                  |            |            |
| 100123473 | Trdc      | T-cell receptor delta, constant region                                                      | 1             |           |             |            |            | 4.99       |             |                                                  |            |            |
| 245828    | Trappc1   | trafficking protein particle complex 1                                                      | 1             |           |             |            |            | 1.28       |             |                                                  |            |            |
| 229801    | Tram1l1   | translocation associated membrane protein 1-like 1                                          | 1             |           | -2.12       |            |            |            |             |                                                  |            |            |
| 22031     | Traf3     | TNF receptor-associated factor 3                                                            | 1             |           |             |            |            | 1.27       |             |                                                  |            |            |
| 101214    | Tra2a     | transformer 2 alpha homolog (Drosophila)                                                    | 1             |           |             |            |            | 1.40       |             |                                                  |            |            |
| 17229     | Tpsb2     | tryptase beta 2                                                                             | 1             |           |             |            |            | 2.49       |             |                                                  |            |            |
| 97031     | Tprn      | taperin                                                                                     | 1             |           |             |            |            | -1.31      |             |                                                  |            |            |
| 244579    | Tox3      | TOX high mobility group box family member 3                                                 | 1             |           | -2.32       |            |            |            |             |                                                  |            |            |
| 235559    | Topbp1    | topoisomerase (DNA) II binding protein 1                                                    | 1             |           |             |            |            | 1.87       |             |                                                  |            |            |
| 28185     | Tomm70a   | translocase of outer mitochondrial membrane 70 homolog A (yeast)                            | 1             |           | 1.32        |            |            |            |             |                                                  |            |            |
| 66119     | Tomm6     | translocase of outer mitochondrial membrane 6 homolog (yeast)                               | 1             |           |             |            |            | 1.15       |             |                                                  |            |            |
| 231861    | Tnrc18    | trinucleotide repeat containing 18                                                          | 1             |           |             |            |            | -1.32      |             |                                                  |            |            |
| 665113    | Tnik      | TRAF2 and NCK interacting kinase                                                            | 1             |           |             |            |            | 1.99       |             |                                                  |            |            |
| 21944     | Tnfsf12   | tumor necrosis factor (ligand) superfamily, member 12                                       | 1             |           |             |            |            | -1.23      |             |                                                  |            |            |
| 66443     | Tnfaip8l1 | tumor necrosis factor, alpha-induced protein 8-like 1                                       | 1             |           |             |            |            | -1.51      |             |                                                  |            |            |
| 387314    | Tmtc1     | transmembrane and tetratricopeptide repeat containing 1                                     | 1             |           | -1.33       |            |            |            |             |                                                  |            |            |

| Gene ID | Symbol   | Description                                                               | DEG/Set count | 2mWT_2mKO | 20mWT_20mKO | 2mKO_20mKO | 2mWT_20mWT | 2mWT_30mWT | 20mWT_30mWT | Literature-Mining (Aging-Cholesterol literature) |            |            |
|---------|----------|---------------------------------------------------------------------------|---------------|-----------|-------------|------------|------------|------------|-------------|--------------------------------------------------|------------|------------|
|         |          |                                                                           |               | 9         | 230         | 406        | 48         | 1904       | 1157        | #Paper                                           | Enrichment | BH P-value |
| 20776   | Tmie     | transmembrane inner ear                                                   | 1             |           |             |            |            |            |             |                                                  |            |            |
| 433485  | Tmem90b  | transmembrane protein 90B                                                 | 1             |           | -1.46       |            |            | -1.40      |             |                                                  |            |            |
| 66241   | Tmem9    | transmembrane protein 9                                                   | 1             |           |             |            |            | 1.38       |             |                                                  |            |            |
| 70397   | Tmem70   | transmembrane protein 70                                                  | 1             |           |             |            |            | 1.26       |             |                                                  |            |            |
| 96957   | Tmem62   | transmembrane protein 62                                                  | 1             |           |             |            |            | -1.43      |             |                                                  |            |            |
| 214359  | Tmem51   | transmembrane protein 51                                                  | 1             |           |             |            |            | 1.67       |             |                                                  |            |            |
| 66079   | Tmem42   | transmembrane protein 42                                                  | 1             |           |             |            |            | -1.52      |             |                                                  |            |            |
| 68796   | Tmem214  | transmembrane protein 214                                                 | 1             |           |             |            |            | -1.36      |             |                                                  |            |            |
| 66320   | Tmem208  | transmembrane protein 208                                                 | 1             |           |             |            |            | 1.19       |             |                                                  |            |            |
| 73893   | Tmem202  | transmembrane protein 202                                                 | 1             |           |             |            |            | 1.58       |             |                                                  |            |            |
| 230917  | Tmem201  | transmembrane protein 201                                                 | 1             |           |             |            |            | -1.23      |             |                                                  |            |            |
| 240660  | Tmem20   | transmembrane protein 20                                                  | 1             |           |             |            |            | 1.62       |             |                                                  |            |            |
| 83921   | Tmem2    | transmembrane protein 2                                                   | 1             |           |             |            |            | -1.25      |             |                                                  |            |            |
| 69094   | Tmem160  | transmembrane protein 160                                                 | 1             |           |             |            |            | -1.51      |             |                                                  |            |            |
| 66087   | Tmem111  | transmembrane protein 111                                                 | 1             |           |             |            |            | -1.12      |             |                                                  |            |            |
| 216821  | Tmem11   | transmembrane protein 11                                                  | 1             |           |             |            |            | 1.40       |             |                                                  |            |            |
| 68212   | Tmbim4   | transmembrane BAX inhibitor motif containing 4                            | 1             |           |             |            |            | 1.20       |             |                                                  |            |            |
| 69660   | Tmbim1   | transmembrane BAX inhibitor motif containing 1                            | 1             |           |             |            |            | -1.25      |             |                                                  |            |            |
| 68634   | Tm2d3    | TM2 domain containing 3                                                   | 1             |           |             |            |            | -1.23      |             |                                                  |            |            |
| 142980  | Tlr3     | toll-like receptor 3                                                      | 1             |           |             |            |            | 1.52       |             |                                                  |            |            |
| 21886   | Tle2     | transducin-like enhancer of split 2, homolog of Drosophila E(spl)         | 1             |           |             |            |            | -1.50      |             |                                                  |            |            |
| 57813   | Tk2      | thymidine kinase 2, mitochondrial                                         | 1             |           |             |            |            | 1.98       |             |                                                  |            |            |
| 21877   | Tk1      | thymidine kinase 1                                                        | 1             |           |             |            |            | 2.24       |             |                                                  |            |            |
| 21855   | Timm17b  | translocase of inner mitochondrial membrane 17b                           | 1             |           |             |            |            | -1.44      |             |                                                  |            |            |
| 21854   | Timm17a  | translocase of inner mitochondrial membrane 17a                           | 1             |           |             |            |            | 1.25       |             |                                                  |            |            |
| 14911   | Thumpd3  | THUMP domain containing 3                                                 | 1             |           |             |            |            | 1.25       |             |                                                  |            |            |
| 233802  | Thumpd1  | THUMP domain containing 1                                                 | 1             |           |             |            |            | 1.52       |             |                                                  |            |            |
| 331046  | Tgm4     | transglutaminase 4 (prostate)                                             | 1             |           |             |            |            | -1.46      |             |                                                  |            |            |
| 224481  | Tfb1m    | transcription factor B1, mitochondrial                                    | 1             |           |             |            |            | -1.27      |             |                                                  |            |            |
| 104271  | Tex15    | testis expressed gene 15                                                  | 1             | 1.85      |             |            |            |            |             |                                                  |            |            |
| 21679   | Tead4    | TEA domain family member 4                                                | 1             |           |             |            |            | -1.43      |             |                                                  |            |            |
| 104884  | Tdp1     | tyrosyl-DNA phosphodiesterase 1                                           | 1             |           |             |            |            | -1.51      |             |                                                  |            |            |
| 102791  | Tcta     | T-cell leukemia translocation altered gene                                | 1             |           |             |            |            | -1.31      |             |                                                  |            |            |
| 21407   | Tcf15    | transcription factor 15                                                   | 1             |           |             |            |            | -2.47      |             |                                                  |            |            |
| 56070   | Tcerg1   | transcription elongation regulator 1 (CA150)                              | 1             |           |             |            |            | 1.31       |             |                                                  |            |            |
| 21385   | Tbx2     | T-box 2                                                                   | 1             |           |             |            |            | 1.66       |             |                                                  |            |            |
| 56480   | Tbk1     | TANK-binding kinase 1                                                     | 1             |           |             |            |            | 1.37       |             |                                                  |            |            |
| 70573   | Tbccd1   | TBCC domain containing 1                                                  | 1             |           |             |            |            | 1.25       |             |                                                  |            |            |
| 57915   | Tbc1d1   | TBC1 domain family, member 1                                              | 1             |           |             |            |            | 1.54       |             |                                                  |            |            |
| 75812   | Tasp1    | taspace, threonine aspartase 1                                            | 1             |           |             |            |            | 1.74       |             |                                                  |            |            |
| 21353   | Tank     | TRAF family member-associated Nf-kappa B activator                        | 1             |           |             |            |            | 1.80       |             |                                                  |            |            |
| 407786  | Taf9b    | TAF9B RNA polymerase II, TATA box binding protein (TBP)-associated factor | 1             |           |             |            |            | -1.23      |             |                                                  |            |            |
| 68776   | Taf11    | TAF11 RNA polymerase II, TATA box binding protein (TBP)-associated factor | 1             |           |             |            |            | 1.25       |             |                                                  |            |            |
| 217031  | Tada2a   | transcriptional adaptor 2A                                                | 1             |           |             |            |            | -1.23      |             |                                                  |            |            |
| 230676  | Szt2     | seizure threshold 2                                                       | 1             |           |             |            |            | -1.48      |             |                                                  |            |            |
| 71709   | Syde1    | synapse defective 1, Rho GTPase, homolog 1 (C. elegans)                   | 1             |           |             |            |            | -1.45      |             |                                                  |            |            |
| 72931   | Swi5     | SWI5 recombination repair homolog (yeast)                                 | 1             |           |             |            |            | 1.25       |             |                                                  |            |            |
| 225888  | Suv420h1 | suppressor of variegation 4-20 homolog 1 (Drosophila)                     | 1             |           |             |            |            | -1.27      |             |                                                  |            |            |
| 20937   | Suv39h1  | suppressor of variegation 3-9 homolog 1 (Drosophila)                      | 1             |           |             |            |            | -1.23      |             |                                                  |            |            |
| 20926   | Supt6h   | suppressor of Ty 6 homolog (S. cerevisiae)                                | 1             |           |             |            |            | 1.17       |             |                                                  |            |            |
| 77053   | Sun1     | Sad1 and UNC84 domain containing 1                                        | 1             |           |             |            |            | -1.20      |             |                                                  |            |            |
| 57429   | Sult5a1  | sulfotransferase family 5A, member 1                                      | 1             |           |             |            |            | -1.95      |             |                                                  |            |            |
| 53331   | Stx7     | syntaxin 7                                                                | 1             |           |             |            |            | 1.37       |             |                                                  |            |            |
| 58244   | Stx6     | syntaxin 6                                                                | 1             |           |             |            |            | -1.35      |             |                                                  |            |            |
| 20867   | Stip1    | stress-induced phosphoprotein 1                                           | 1             |           |             |            |            | 1.69       |             |                                                  |            |            |
| 52331   | Stbd1    | starch binding domain 1                                                   | 1             |           | -1.50       |            |            |            |             |                                                  |            |            |
| 99138   | Stard7   | START domain containing 7                                                 | 1             |           |             |            |            | -1.19      |             |                                                  |            |            |
| 243362  | Stard13  | STAR-related lipid transfer (START) domain containing 13                  | 1             |           |             |            |            | 1.33       |             |                                                  |            |            |
| 217154  | Stac2    | SH3 and cysteine rich domain 2                                            | 1             |           |             |            |            | 2.67       |             |                                                  |            |            |
| 229681  | Sti7l    | suppression of tumorigenicity 7-like                                      | 1             |           | 1.29        |            |            |            |             |                                                  |            |            |
| 68991   | Ssu72    | Ssu72 RNA polymerase II CTD phosphatase homolog (yeast)                   | 1             |           |             |            |            | 1.38       |             |                                                  |            |            |
| 14105   | Srsf10   | serine/arginine-rich splicing factor 10                                   | 1             |           |             |            |            | 1.42       |             |                                                  |            |            |
| 18412   | Sqstm1   | sequestosome 1                                                            | 1             |           |             |            |            | 1.24       |             |                                                  |            |            |
| 20773   | Sptlc2   | serine palmitoyltransferase, long chain base subunit 2                    | 1             |           |             |            |            | -1.45      |             |                                                  |            |            |
| 24063   | Spry1    | sprouty homolog 1 (Drosophila)                                            | 1             |           |             |            |            | -1.57      |             |                                                  |            |            |
| 20751   | Spr      | sepiapterin reductase                                                     | 1             |           |             |            |            | 1.33       |             |                                                  |            |            |
| 66624   | Spcs2    | signal peptidase complex subunit 2 homolog (S. cerevisiae)                | 1             |           |             |            |            | 1.31       |             |                                                  |            |            |
| 71242   | Spata24  | spermatogenesis associated 24                                             | 1             |           |             |            |            | -1.56      |             |                                                  |            |            |
| 216873  | Spag7    | sperm associated antigen 7                                                | 1             |           |             |            |            | 1.19       |             |                                                  |            |            |
| 75622   | Spaca3   | sperm acrosome associated 3                                               | 1             |           |             |            |            | -1.46      |             |                                                  |            |            |
| 20668   | Sox13    | SRY-box containing gene 13                                                | 1             |           | 1.27        |            |            |            |             |                                                  |            |            |
| 20322   | Sord     | sorbitol dehydrogenase                                                    | 1             |           |             |            |            | -1.24      |             |                                                  |            |            |



| Gene ID | Symbol   | Description                                                                                                                                 | DEG/Set count | 2mWT_2mKO | 20mWT_20mKO | 2mKO_20mKO | 2mWT_20mWT | 2mWT_30mWT | 20mWT_30mWT | Literature-Mining (Aging-Cholesterol literature) |            |            |
|---------|----------|---------------------------------------------------------------------------------------------------------------------------------------------|---------------|-----------|-------------|------------|------------|------------|-------------|--------------------------------------------------|------------|------------|
|         |          |                                                                                                                                             |               | 9         | 230         | 406        | 48         | 1904       | 1157        | #Paper                                           | Enrichment | BH P-value |
| 20410   | Sorbs3   | sorbin and SH3 domain containing 3                                                                                                          | 1             |           |             |            |            | -1.34      |             |                                                  |            |            |
| 266781  | Snx17    | sorting nexin 17                                                                                                                            | 1             |           | 1.12        |            |            |            |             |                                                  |            |            |
| 74718   | Snx16    | sorting nexin 16                                                                                                                            | 1             |           |             |            |            | 1.48       |             |                                                  |            |            |
| 71982   | Snx10    | sorting nexin 10                                                                                                                            | 1             |           |             |            |            | 1.79       |             |                                                  |            |            |
| 67332   | Snrpd3   | small nuclear ribonucleoprotein D3                                                                                                          | 1             |           |             |            |            | 1.34       |             |                                                  |            |            |
| 68981   | Snrpa1   | small nuclear ribonucleoprotein polypeptide A'                                                                                              | 1             |           |             |            |            | -1.19      |             |                                                  |            |            |
| 66618   | Snmp27   | small nuclear ribonucleoprotein 27 (U4/U6.U5)                                                                                               | 1             |           |             |            |            | 1.37       |             |                                                  |            |            |
| 66835   | Snord123 | small nucleolar RNA, C/D box 123                                                                                                            | 1             |           |             |            |            | -1.43      |             |                                                  |            |            |
| 69895   | Snhg8    | small nucleolar RNA host gene 8                                                                                                             | 1             |           |             |            |            | -1.32      |             |                                                  |            |            |
| 72655   | Snhg5    | small nucleolar RNA host gene 5                                                                                                             | 1             |           | 1.28        |            |            |            |             |                                                  |            |            |
| 56463   | Snd1     | staphylococcal nuclease and tudor domain containing 1                                                                                       | 1             |           |             |            |            | 1.25       |             |                                                  |            |            |
| 20603   | Sms      | spermine synthase                                                                                                                           | 1             |           | -2.05       |            |            |            |             |                                                  |            |            |
| 319757  | Smo      | smoothened homolog (Drosophila)                                                                                                             | 1             |           |             |            |            | -1.77      |             |                                                  |            |            |
| 20595   | Smn1     | survival motor neuron 1                                                                                                                     | 1             |           |             |            |            | 1.27       |             |                                                  |            |            |
| 225655  | Slmo1    | slowmo homolog 1 (Drosophila)                                                                                                               | 1             |           |             |            |            | -1.27      |             |                                                  |            |            |
| 20874   | Slk      | STE20-like kinase (yeast)                                                                                                                   | 1             |           |             |            |            | 1.28       |             |                                                  |            |            |
| 240726  | Slco5a1  | solute carrier organic anion transporter family, member 5A1                                                                                 | 1             |           | -2.37       |            |            |            |             |                                                  |            |            |
| 20540   | Slc7a7   | solute carrier family 7 (cationic amino acid transporter, y+ system), member 7                                                              | 1             |           |             |            |            | 1.93       |             |                                                  |            |            |
| 106947  | Slc39a3  | solute carrier family 39 (zinc transporter), member 3                                                                                       | 1             |           |             |            |            | -1.41      |             |                                                  |            |            |
| 68427   | Slc39a13 | solute carrier family 39 (metal ion transporter), member 13                                                                                 | 1             |           |             |            |            | -1.74      |             |                                                  |            |            |
| 72144   | Slc37a3  | solute carrier family 37 (glycerol-3-phosphate transporter), member 3                                                                       | 1             |           |             |            |            | -1.32      |             |                                                  |            |            |
| 270066  | Slc35e1  | solute carrier family 35, member E1                                                                                                         | 1             |           |             |            |            | -1.16      |             |                                                  |            |            |
| 22232   | Slc35a2  | solute carrier family 35 (UDP-galactose transporter), member A2                                                                             | 1             |           |             |            |            | -1.26      |             |                                                  |            |            |
| 69048   | Slc30a5  | solute carrier family 30 (zinc transporter), member 5                                                                                       | 1             |           |             |            |            | 1.40       |             |                                                  |            |            |
| 56017   | Slc2a8   | solute carrier family 2, (facilitated glucose transporter), member 8                                                                        | 1             |           |             |            |            | -1.43      |             |                                                  |            |            |
| 170441  | Slc2a10  | solute carrier family 2 (facilitated glucose transporter), member 10                                                                        | 1             |           |             |            |            | -1.60      |             |                                                  |            |            |
| 104910  | Slc25a47 | solute carrier family 25, member 47                                                                                                         | 1             |           |             |            |            | -1.65      |             |                                                  |            |            |
| 73132   | Slc25a16 | solute carrier family 25 (mitochondrial carrier, Graves disease autoantigen), member 16                                                     | 1             |           |             |            |            | 1.73       |             |                                                  |            |            |
| 238384  | Slc24a4  | solute carrier family 24 (sodium/potassium/calcium exchanger), member 4                                                                     | 1             |           |             |            |            | -1.42      |             |                                                  |            |            |
| 73102   | Slc22a23 | solute carrier family 22, member 23                                                                                                         | 1             |           |             |            |            | 1.39       |             |                                                  |            |            |
| 210463  | Slc22a22 | solute carrier family 22 (organic cation transporter), member 22                                                                            | 1             |           |             |            |            | -3.78      |             |                                                  |            |            |
| 56517   | Slc22a21 | solute carrier family 22 (organic cation transporter), member 21                                                                            | 1             |           |             |            |            | -1.52      |             |                                                  |            |            |
| 20516   | Slc20a2  | solute carrier family 20, member 2                                                                                                          | 1             |           |             |            |            | -1.45      |             |                                                  |            |            |
| 214084  | Slc18a2  | solute carrier family 18 (vesicular monoamine), member 2                                                                                    | 1             |           |             |            |            | 1.93       |             |                                                  |            |            |
| 20482   | Skil     | SKI-like                                                                                                                                    | 1             |           |             |            |            | 1.38       |             |                                                  |            |            |
| 20474   | Six4     | sine oculis-related homeobox 4 homolog (Drosophila)                                                                                         | 1             |           | -1.68       |            |            |            |             |                                                  |            |            |
| 30954   | Siva1    | SIVA1, apoptosis-inducing factor                                                                                                            | 1             |           |             |            |            | -1.25      |             |                                                  |            |            |
| 19261   | Sirpa    | signal-regulatory protein alpha                                                                                                             | 1             |           |             |            |            | 1.36       |             |                                                  |            |            |
| 20467   | Sin3b    | transcriptional regulator, SIN3B (yeast)                                                                                                    | 1             |           | 1.30        |            |            |            |             |                                                  |            |            |
| 268281  | Shprh    | SNF2 histone linker PHD RING helicase                                                                                                       | 1             |           |             |            |            | -1.36      |             |                                                  |            |            |
| 230126  | Shb      | src homology 2 domain-containing transforming protein B                                                                                     | 1             |           | 1.50        |            |            |            |             |                                                  |            |            |
| 58234   | Shank3   | SH3/ankyrin domain gene 3                                                                                                                   | 1             |           |             |            |            | -1.38      |             |                                                  |            |            |
| 268396  | Sh3pxd2b | SH3 and PX domains 2B                                                                                                                       | 1             |           |             |            |            | 1.41       |             |                                                  |            |            |
| 20408   | Sh3gl3   | SH3-domain GRB2-like 3                                                                                                                      | 1             |           |             |            | -1.59      |            |             |                                                  |            |            |
| 98402   | Sh3bp4   | SH3-domain binding protein 4                                                                                                                | 1             |           |             |            |            | -1.27      |             |                                                  |            |            |
| 94281   | Sfxn4    | sideroflexin 4                                                                                                                              | 1             |           |             |            |            | -1.39      |             |                                                  |            |            |
| 94279   | Sfxn2    | sideroflexin 2                                                                                                                              | 1             |           |             |            |            | -1.50      |             |                                                  |            |            |
| 108735  | Sft2d2   | SFT2 domain containing 2                                                                                                                    | 1             |           | 1.24        |            |            |            |             |                                                  |            |            |
| 20379   | Sfrp4    | secreted frizzled-related protein 4                                                                                                         | 1             |           |             |            |            | -2.68      |             |                                                  |            |            |
| 353282  | Sfmbt2   | Scm-like with four mbt domains 2                                                                                                            | 1             |           |             |            |            | -2.86      |             |                                                  |            |            |
| 67956   | Setd8    | SET domain containing (lysine methyltransferase) 8                                                                                          | 1             |           |             |            |            | -1.15      |             |                                                  |            |            |
| 140742  | Sesn1    | sestrin 1                                                                                                                                   | 1             |           |             |            |            | -1.35      |             |                                                  |            |            |
| 20317   | Serpinf1 | serine (or cysteine) peptidase inhibitor, clade F, member 1                                                                                 | 1             |           |             |            |            | -1.44      |             |                                                  |            |            |
| 72661   | Serp2    | stress-associated endoplasmic reticulum protein family member 2                                                                             | 1             |           |             |            |            | -1.41      |             |                                                  |            |            |
| 218442  | Serinc5  | serine incorporator 5                                                                                                                       | 1             |           |             |            |            | 1.98       |             |                                                  |            |            |
| 230779  | Serinc2  | serine incorporator 2                                                                                                                       | 1             |           | -2.26       |            |            |            |             |                                                  |            |            |
| 378702  | Serf2    | small EDRK-rich factor 2                                                                                                                    | 1             |           |             |            |            | -1.17      |             |                                                  |            |            |
| 20365   | Serf1    | small EDRK-rich factor 1                                                                                                                    | 1             |           |             |            |            | -1.70      |             |                                                  |            |            |
| 20361   | Sema7a   | sema domain, immunoglobulin domain (Ig), and GPI membrane anchor, (semaphorin) 7A                                                           | 1             |           |             |            |            | 1.31       |             |                                                  |            |            |
| 20357   | Sema5b   | sema domain, seven thrombospondin repeats (type 1 and type 1-like), transmembrane domain (TM) and short cytoplasmic domain, (semaphorin) 5B | 1             |           |             |            |            | -1.41      |             |                                                  |            |            |

| Gene ID | Symbol   | Description                                                                                                      | DEG/Set count | 2mWT_2mKO | 20mWT_20mKO | 2mKO_20mKO | 2mWT_20mWT | 2mWT_30mWT | 20mWT_30mWT | Literature-Mining (Aging-Cholesterol literature) |            |            |
|---------|----------|------------------------------------------------------------------------------------------------------------------|---------------|-----------|-------------|------------|------------|------------|-------------|--------------------------------------------------|------------|------------|
|         |          |                                                                                                                  |               | 9         | 230         | 406        | 48         | 1904       | 1157        | #Paper                                           | Enrichment | BH P-value |
| 20354   | Sema4d   | sema domain, immunoglobulin domain (Ig), transmembrane domain (TM) and short cytoplasmic domain, (semaphorin) 4D | 1             |           |             |            |            | 1.60       |             |                                                  |            |            |
| 27054   | Sec23b   | SEC23B ( <i>S. cerevisiae</i> )                                                                                  | 1             |           |             |            |            | 1.24       |             |                                                  |            |            |
| 317717  | Sec22a   | SEC22 vesicle trafficking protein homologue A ( <i>S. cerevisiae</i> )                                           | 1             |           |             |            |            | -1.32      |             |                                                  |            |            |
| 330222  | Sdk1     | sidekick homolog 1 (chicken)                                                                                     | 1             |           |             |            |            | -1.37      |             |                                                  |            |            |
| 53378   | Sdcbp    | syndecan binding protein                                                                                         | 1             |           |             |            |            | 1.51       |             |                                                  |            |            |
| 105782  | Scrib    | scribbled homolog ( <i>Drosophila</i> )                                                                          | 1             |           |             |            |            | -1.51      |             |                                                  |            |            |
| 20277   | Scnn1b   | sodium channel, nonvoltage-gated 1 beta                                                                          | 1             |           |             |            |            | -1.48      |             |                                                  |            |            |
| 399548  | Scn4b    | sodium channel, type IV, beta                                                                                    | 1             |           | -2.30       |            |            |            |             |                                                  |            |            |
| 219151  | Scara3   | scavenger receptor class A, member 3                                                                             | 1             |           |             |            |            | -1.60      |             |                                                  |            |            |
| 319934  | Sbf2     | SET binding factor 2                                                                                             | 1             |           |             |            |            | -1.27      |             |                                                  |            |            |
| 20230   | Satb1    | special AT-rich sequence binding protein 1                                                                       | 1             |           |             |            |            | -1.35      |             |                                                  |            |            |
| 69215   | Sat2     | spermidine/spermine N1-acetyl transferase 2                                                                      | 1             |           |             |            |            | -1.30      |             |                                                  |            |            |
| 192166  | Sardh    | sarcosine dehydrogenase                                                                                          | 1             |           | 1.43        |            |            |            |             |                                                  |            |            |
| 20220   | Sap18    | Sin3-associated polypeptide 18                                                                                   | 1             |           |             |            |            | -1.33      |             |                                                  |            |            |
| 235636  | Rtp3     | receptor transporter protein 3                                                                                   | 1             |           |             |            |            | -1.96      |             |                                                  |            |            |
| 18114   | Rrp1     | ribosomal RNA processing 1 homolog ( <i>S. cerevisiae</i> )                                                      | 1             |           |             |            |            | 1.29       |             |                                                  |            |            |
| 20130   | Rras     | Harvey rat sarcoma oncogene, subgroup R                                                                          | 1             |           |             |            |            | -1.33      |             |                                                  |            |            |
| 76846   | Rps9     | ribosomal protein S9                                                                                             | 1             |           |             |            |            | 1.36       |             |                                                  |            |            |
| 57294   | Rps27    | ribosomal protein S27                                                                                            | 1             |           |             |            |            | 1.76       |             |                                                  |            |            |
| 20054   | Rps15    | ribosomal protein S15                                                                                            | 1             |           |             |            |            | -1.15      |             |                                                  |            |            |
| 66646   | Rpe      | ribulose-5-phosphate-3-epimerase                                                                                 | 1             |           |             |            |            | 1.41       |             |                                                  |            |            |
| 66049   | Rogdi    | rogdi homolog ( <i>Drosophila</i> )                                                                              | 1             |           |             |            |            | 1.32       |             |                                                  |            |            |
| 71673   | Rnf215   | ring finger protein 215                                                                                          | 1             |           |             |            |            | -1.27      |             |                                                  |            |            |
| 75234   | Rnf19b   | ring finger protein 19B                                                                                          | 1             |           |             |            |            | 1.71       |             |                                                  |            |            |
| 59044   | Rnf130   | ring finger protein 130                                                                                          | 1             |           |             |            |            | -1.20      |             |                                                  |            |            |
| 67845   | Rnf115   | ring finger protein 115                                                                                          | 1             |           |             |            |            | 1.37       |             |                                                  |            |            |
| 50849   | Rnf10    | ring finger protein 10                                                                                           | 1             |           |             |            |            | 1.36       |             |                                                  |            |            |
| 56532   | Ripk3    | receptor-interacting serine-threonine kinase 3                                                                   | 1             |           | 1.41        |            |            |            |             |                                                  |            |            |
| 66878   | Rio3     | RIO kinase 3 (yeast)                                                                                             | 1             |           |             |            |            | 1.31       |             |                                                  |            |            |
| 78757   | Rictor   | RPTOR independent companion of MTOR, complex 2                                                                   | 1             |           |             |            |            | 1.49       |             |                                                  |            |            |
| 66611   | Ribc1    | RIB43A domain with coiled-coils 1                                                                                | 1             |           |             |            |            | -1.42      |             |                                                  |            |            |
| 14787   | Rhpn1    | rhophilin, Rho GTPase binding protein 1                                                                          | 1             |           |             |            |            | -1.55      |             |                                                  |            |            |
| 59040   | Rhot1    | ras homolog gene family, member T1                                                                               | 1             |           |             |            |            | -1.34      |             |                                                  |            |            |
| 11853   | Rhoc     | ras homolog gene family, member C                                                                                | 1             |           |             |            |            | 1.52       |             |                                                  |            |            |
| 215160  | Rhbdd2   | rhomboid domain containing 2                                                                                     | 1             |           |             |            |            | -1.35      |             |                                                  |            |            |
| 76867   | Rhbdd1   | rhomboid domain containing 1                                                                                     | 1             |           |             |            |            | 1.28       |             |                                                  |            |            |
| 319758  | Rfx7     | regulatory factor X, 7                                                                                           | 1             |           |             |            |            | 1.58       |             |                                                  |            |            |
| 67830   | Rer1     | RER1 retention in endoplasmic reticulum 1 homolog ( <i>S. cerevisiae</i> )                                       | 1             |           |             |            |            | -1.12      |             |                                                  |            |            |
| 140743  | Rem2     | rad and gem related GTP binding protein 2                                                                        | 1             |           | -2.66       |            |            |            |             |                                                  |            |            |
| 70335   | Reep6    | receptor accessory protein 6                                                                                     | 1             |           |             |            |            | -2.02      |             |                                                  |            |            |
| 13476   | Reep5    | receptor accessory protein 5                                                                                     | 1             |           |             |            |            | -1.10      |             |                                                  |            |            |
| 319817  | Rc3h2    | ring finger and CCCH-type zinc finger domains 2                                                                  | 1             |           |             |            |            | 1.30       |             |                                                  |            |            |
| 207181  | Rbms3    | RNA binding motif, single stranded interacting protein                                                           | 1             |           | -1.69       |            |            |            |             |                                                  |            |            |
| 71684   | Rbm43    | RNA binding motif protein 43                                                                                     | 1             |           |             |            |            | 1.31       |             |                                                  |            |            |
| 66810   | Rbm22    | RNA binding motif protein 22                                                                                     | 1             |           |             |            |            | 1.45       |             |                                                  |            |            |
| 19651   | Rbl2     | retinoblastoma-like 2                                                                                            | 1             |           |             |            |            | 1.60       |             |                                                  |            |            |
| 320292  | Rasgef1b | RasGEF domain family, member 1B                                                                                  | 1             |           |             |            |            | 1.98       |             |                                                  |            |            |
| 19385   | Ranbp1   | RAN binding protein 1                                                                                            | 1             |           |             |            |            | 1.48       |             |                                                  |            |            |
| 54409   | Ramp2    | receptor (calcitonin) activity modifying protein 2                                                               | 1             |           |             |            |            | -1.58      |             |                                                  |            |            |
| 75646   | Rai14    | retinoic acid induced 14                                                                                         | 1             |           |             |            |            | -1.34      |             |                                                  |            |            |
| 56715   | Rabgef1  | RAB guanine nucleotide exchange factor (GEF) 1                                                                   | 1             |           |             |            |            | -1.17      |             |                                                  |            |            |
| 224624  | Rab40c   | Rab40c, member RAS oncogene family                                                                               | 1             |           |             |            |            | -1.47      |             |                                                  |            |            |
| 76877   | Rab36    | RAB36, member RAS oncogene family                                                                                | 1             |           |             |            |            | -1.31      |             |                                                  |            |            |
| 19376   | Rab34    | RAB34, member of RAS oncogene family                                                                             | 1             |           | 1.47        |            |            |            |             |                                                  |            |            |
| 59021   | Rab2a    | RAB2A, member RAS oncogene family                                                                                | 1             |           |             |            |            | -1.24      |             |                                                  |            |            |
| 19332   | Rab20    | RAB20, member RAS oncogene family                                                                                | 1             |           |             |            |            | 1.79       |             |                                                  |            |            |
| 19330   | Rab18    | RAB18, member RAS oncogene family                                                                                | 1             |           |             |            |            | 1.30       |             |                                                  |            |            |
| 72135   | Pygo1    | pygopus 1                                                                                                        | 1             |           |             |            |            | -1.56      |             |                                                  |            |            |
| 218699  | Pxk      | PX domain containing serine/threonine kinase                                                                     | 1             |           |             |            |            | 1.54       |             |                                                  |            |            |
| 103136  | Pwp1     | PWP1 homolog ( <i>S. cerevisiae</i> )                                                                            | 1             |           |             |            |            | 1.49       |             |                                                  |            |            |
| 108705  | Pttg1ip  | pituitary tumor-transforming 1 interacting protein                                                               | 1             |           |             |            |            | -1.18      |             |                                                  |            |            |
| 329384  | Ptrh1    | peptidyl-tRNA hydrolase 1 homolog ( <i>S. cerevisiae</i> )                                                       | 1             |           |             |            |            | 2.31       |             |                                                  |            |            |
| 19267   | Ptpre    | protein tyrosine phosphatase, receptor type, E                                                                   | 1             |           |             |            |            | -1.24      |             |                                                  |            |            |
| 19262   | Ptpra    | protein tyrosine phosphatase, receptor type, A                                                                   | 1             |           |             |            |            | 1.32       |             |                                                  |            |            |
| 19250   | Ptpn14   | protein tyrosine phosphatase, non-receptor type 14                                                               | 1             |           |             |            |            | -1.33      |             |                                                  |            |            |
| 66461   | Ptpmt1   | protein tyrosine phosphatase, mitochondrial 1                                                                    | 1             |           |             |            |            | -1.36      |             |                                                  |            |            |
| 218232  | Ptpdc1   | protein tyrosine phosphatase domain containing 1                                                                 | 1             |           |             |            |            | -1.32      |             |                                                  |            |            |
| 19219   | Ptger4   | prostaglandin E receptor 4 (subtype EP4)                                                                         | 1             |           |             |            |            | 1.53       |             |                                                  |            |            |
| 19218   | Ptger3   | prostaglandin E receptor 3 (subtype EP3)                                                                         | 1             |           | 2.89        |            |            |            |             |                                                  |            |            |
| 27388   | Ptdss2   | phosphatidylserine synthase 2                                                                                    | 1             |           |             |            |            | -1.40      |             |                                                  |            |            |
| 19210   | Ptdss1   | phosphatidylserine synthase 1                                                                                    | 1             |           |             |            |            | -1.16      |             |                                                  |            |            |
| 19200   | Pstpip1  | proline-serine-threonine phosphatase-interacting protein 1                                                       | 1             |           |             |            |            | 2.35       |             |                                                  |            |            |

| Gene ID | Symbol   | Description                                                                      | DEG/Set count | 2mWT_2mKO | 20mWT_20mKO | 2mKO_20mKO | 2mWT_20mWT | 2mWT_30mWT | 20mWT_30mWT | Literature-Mining (Aging-Cholesterol literature) |            |            |
|---------|----------|----------------------------------------------------------------------------------|---------------|-----------|-------------|------------|------------|------------|-------------|--------------------------------------------------|------------|------------|
|         |          |                                                                                  |               | 9         | 230         | 406        | 48         | 1904       | 1157        | #Paper                                           | Enrichment | BH P-value |
| 100678  | Psph     | phosphoserine phosphatase                                                        | 1             |           |             |            |            |            | 1.34        |                                                  |            |            |
| 66506   | Psmg3    | proteasome (prosome, macropain) assembly chaperone 3                             | 1             |           |             |            |            | 1.42       |             |                                                  |            |            |
| 228769  | Psmf1    | proteasome (prosome, macropain) inhibitor subunit 1                              | 1             |           |             |            |            | -1.32      |             |                                                  |            |            |
| 19192   | Psmc3    | proteasome (prosome, macropain) 28 subunit, 3                                    | 1             |           |             |            |            | 1.62       |             |                                                  |            |            |
| 19186   | Psmc1    | proteasome (prosome, macropain) 28 subunit, alpha                                | 1             |           |             |            |            | 1.49       |             |                                                  |            |            |
| 57296   | Psmc8    | proteasome (prosome, macropain) 26S subunit, non-ATPase, 8                       | 1             |           |             |            |            | 1.17       |             |                                                  |            |            |
| 19185   | Psmc4    | proteasome (prosome, macropain) 26S subunit, non-ATPase, 4                       | 1             |           |             |            |            | 1.42       |             |                                                  |            |            |
| 22123   | Psmc3    | proteasome (prosome, macropain) 26S subunit, non-ATPase, 3                       | 1             |           |             |            |            | 1.22       |             |                                                  |            |            |
| 66997   | Psmc12   | proteasome (prosome, macropain) 26S subunit, non-ATPase, 12                      | 1             |           |             |            |            | 1.28       |             |                                                  |            |            |
| 69077   | Psmc11   | proteasome (prosome, macropain) 26S subunit, non-ATPase, 11                      | 1             |           |             |            |            | 1.78       |             |                                                  |            |            |
| 19175   | Psmc6    | proteasome (prosome, macropain) subunit, beta type 6                             | 1             |           |             |            |            | 1.23       |             |                                                  |            |            |
| 19170   | Psmc1    | proteasome (prosome, macropain) subunit, beta type 1                             | 1             |           |             |            |            | 1.14       |             |                                                  |            |            |
| 19153   | Prx      | periaxin                                                                         | 1             |           |             |            |            | -1.18      |             |                                                  |            |            |
| 19142   | Prss12   | protease, serine, 12 neurotrypsin (motopsin)                                     | 1             |           |             |            |            | -1.23      |             |                                                  |            |            |
| 227723  | Prrc2b   | proline-rich coiled-coil 2B                                                      | 1             |           |             |            |            | -1.16      |             |                                                  |            |            |
| 328099  | Prps1l3  | phosphoribosyl pyrophosphate synthetase 1-like 3                                 | 1             |           |             |            |            | 1.33       |             |                                                  |            |            |
| 19128   | Pros1    | protein S (alpha)                                                                | 1             |           |             |            |            | 1.20       |             |                                                  |            |            |
| 109042  | Prkcdp   | protein kinase C, delta binding protein                                          | 1             |           |             |            |            | -1.56      |             |                                                  |            |            |
| 18753   | Prkcd    | protein kinase C, delta                                                          | 1             |           |             |            |            | 1.81       |             |                                                  |            |            |
| 19072   | Prep     | prolyl endopeptidase                                                             | 1             |           |             |            |            | 1.54       |             |                                                  |            |            |
| 116847  | Prelp    | proline arginine-rich end leucine-rich repeat                                    | 1             |           |             |            |            | -1.47      |             |                                                  |            |            |
| 53381   | Prdx4    | peroxiredoxin 4                                                                  | 1             |           |             |            |            | -1.21      |             |                                                  |            |            |
| 11757   | Prdx3    | peroxiredoxin 3                                                                  | 1             |           |             |            |            | 1.44       |             |                                                  |            |            |
| 77630   | Prdm8    | PR domain containing 8                                                           | 1             |           | -1.59       |            |            |            |             |                                                  |            |            |
| 70779   | Prdm5    | PR domain containing 5                                                           | 1             |           |             |            |            | -1.28      |             |                                                  |            |            |
| 114604  | Prdm15   | PR domain containing 15                                                          | 1             |           |             |            |            | -1.36      |             |                                                  |            |            |
| 12142   | Prdm1    | PR domain containing 1, with ZNF domain                                          | 1             |           |             |            |            | 2.86       |             |                                                  |            |            |
| 217430  | Pqlc3    | PQ loop repeat containing                                                        | 1             |           |             |            |            | 1.72       |             |                                                  |            |            |
| 52036   | Ppp6r3   | protein phosphatase 6, regulatory subunit 3                                      | 1             |           |             |            |            | 1.34       |             |                                                  |            |            |
| 72930   | Ppp2r2b  | protein phosphatase 2 (formerly 2A), regulatory subunit B (PR 52), beta isoform  | 1             |           | -2.51       |            |            |            |             |                                                  |            |            |
| 71978   | Ppp2r2a  | protein phosphatase 2 (formerly 2A), regulatory subunit B (PR 52), alpha isoform | 1             |           |             |            |            | 1.37       |             |                                                  |            |            |
| 228852  | Ppp1r16b | protein phosphatase 1, regulatory (inhibitor) subunit 16B                        | 1             |           |             |            |            | -1.50      |             |                                                  |            |            |
| 242083  | Ppm1l    | protein phosphatase 1 (formerly 2C)-like                                         | 1             |           |             |            |            | -1.26      |             |                                                  |            |            |
| 14208   | Ppm1g    | protein phosphatase 1G (formerly 2C), magnesium-dependent, gamma isoform         | 1             |           |             |            |            | 1.24       |             |                                                  |            |            |
| 19035   | Ppib     | peptidylprolyl isomerase B                                                       | 1             |           |             |            |            | 1.15       |             |                                                  |            |            |
| 217734  | Pomt2    | protein-O-mannosyltransferase 2                                                  | 1             |           |             |            |            | -1.31      |             |                                                  |            |            |
| 66537   | Pomp     | proteasome maturation protein                                                    | 1             |           |             |            |            | 1.14       |             |                                                  |            |            |
| 68273   | Pomgnt1  | protein O-linked mannose beta1,2-N-acetylglucosaminyltransferase                 | 1             |           |             |            |            | -1.26      |             |                                                  |            |            |
| 69920   | Polr2i   | polymerase (RNA) II (DNA directed) polypeptide I                                 | 1             |           |             |            |            | -1.20      |             |                                                  |            |            |
| 69241   | Polr2d   | polymerase (RNA) II (DNA directed) polypeptide D                                 | 1             |           |             |            |            | 1.33       |             |                                                  |            |            |
| 64424   | Polr1e   | polymerase (RNA) I polypeptide E                                                 | 1             |           |             |            |            | 1.59       |             |                                                  |            |            |
| 20018   | Polr1d   | polymerase (RNA) I polypeptide D                                                 | 1             |           |             |            |            | 1.21       |             |                                                  |            |            |
| 26447   | Poli     | polymerase (DNA directed), iota                                                  | 1             |           |             |            |            | -1.34      |             |                                                  |            |            |
| 69745   | Pold4    | polymerase (DNA-directed), delta 4                                               | 1             |           |             |            |            | 1.46       |             |                                                  |            |            |
| 80294   | Pofut2   | protein O-fucosyltransferase 2                                                   | 1             |           |             |            |            | -1.36      |             |                                                  |            |            |
| 242608  | Podn     | podocan                                                                          | 1             |           |             |            |            | -1.89      |             |                                                  |            |            |
| 68603   | Pmvk     | phosphomevalonate kinase                                                         | 1             |           |             |            |            | -1.60      |             |                                                  |            |            |
| 102502  | Pls1     | plastin 1 (I-isoform)                                                            | 1             |           |             |            |            | 2.54       |             |                                                  |            |            |
| 18823   | Plip1    | proteolipid protein (myelin) 1                                                   | 1             |           |             |            |            | 1.30       |             |                                                  |            |            |
| 67801   | Plip     | plasma membrane proteolipid                                                      | 1             |           |             |            |            | -1.25      |             |                                                  |            |            |
| 269608  | Plekkg5  | pleckstrin homology domain containing, family G (with RhoGef domain) member 5    | 1             |           |             |            |            | -1.57      |             |                                                  |            |            |
| 263406  | Plekkg3  | pleckstrin homology domain containing, family G (with RhoGef domain) member 3    | 1             |           |             |            |            | -1.48      |             |                                                  |            |            |
| 27276   | Plekhh1  | pleckstrin homology domain containing, family B (evectins) member 1              | 1             |           |             |            |            | -1.17      |             |                                                  |            |            |
| 18807   | Plid3    | phospholipase D family, member 3                                                 | 1             |           |             |            |            | 1.83       |             |                                                  |            |            |
| 18772   | Pkp1     | plakophilin 1                                                                    | 1             |           |             |            |            | 2.40       |             |                                                  |            |            |
| 56305   | Pitpnb   | phosphatidylinositol transfer protein, beta                                      | 1             |           |             |            |            | -1.16      |             |                                                  |            |            |
| 236604  | Pisd-ps1 | phosphatidylserine decarboxylase, pseudogene 1                                   | 1             |           |             |            |            | 1.94       |             |                                                  |            |            |
| 216505  | Pik3ip1  | phosphoinositide-3-kinase interacting protein 1                                  | 1             |           |             |            |            | -1.32      |             |                                                  |            |            |
| 74769   | Pik3cb   | phosphatidylinositol 3-kinase, catalytic, beta polypeptide                       | 1             |           |             |            |            | 1.48       |             |                                                  |            |            |
| 14755   | Pigq     | phosphatidylinositol glycan anchor biosynthesis, class Q                         | 1             |           |             |            |            | -1.16      |             |                                                  |            |            |
| 244650  | Phipp2   | PH domain and leucine rich repeat protein phosphatase 2                          | 1             |           |             |            |            | -1.41      |             |                                                  |            |            |

| Gene ID | Symbol   | Description                                                                                                  | DEG/Set count | 2mWT_2mKO | 20mWT_20mKO | 2mKO_20mKO | 2mWT_20mWT | 2mWT_30mWT | 20mWT_30mWT | Literature-Mining (Aging-Cholesterol literature) |            |            |
|---------|----------|--------------------------------------------------------------------------------------------------------------|---------------|-----------|-------------|------------|------------|------------|-------------|--------------------------------------------------|------------|------------|
|         |          |                                                                                                              |               | 9         | 230         | 406        | 48         | 1904       | 1157        | #Paper                                           | Enrichment | BH P-value |
| 78246   | Phf23    | PHD finger protein 23                                                                                        | 1             |           |             |            |            | 1.22       |             |                                                  |            |            |
| 230936  | Phf13    | PHD finger protein 13                                                                                        | 1             |           |             |            |            | -1.19      |             |                                                  |            |            |
| 13619   | Phc1     | polyhomeotic-like 1 (Drosophila)                                                                             | 1             |           | 1.31        |            |            |            |             |                                                  |            |            |
| 67078   | Pgp      | phosphoglycolate phosphatase                                                                                 | 1             |           |             |            |            | -1.27      |             |                                                  |            |            |
| 54381   | Pgcp     | plasma glutamate carboxypeptidase                                                                            | 1             |           |             |            |            | 1.35       |             |                                                  |            |            |
| 72542   | Pgam5    | phosphoglycerate mutase family member 5                                                                      | 1             |           |             |            |            | 1.35       |             |                                                  |            |            |
| 56612   | Pfdn5    | prefoldin 5                                                                                                  | 1             |           |             |            |            | -1.12      |             |                                                  |            |            |
| 68559   | Pdrg1    | p53 and DNA damage regulated 1                                                                               | 1             |           |             |            |            | -1.17      |             |                                                  |            |            |
| 68797   | Pdgfrl   | platelet-derived growth factor receptor-like                                                                 | 1             |           |             |            |            | -1.45      |             |                                                  |            |            |
| 18596   | Pdgfrb   | platelet derived growth factor receptor, beta polypeptide                                                    | 1             |           |             |            |            | -1.32      |             |                                                  |            |            |
| 18595   | Pdgfra   | platelet derived growth factor receptor, alpha polypeptide                                                   | 1             |           |             |            |            | -1.71      |             |                                                  |            |            |
| 18585   | Pde9a    | phosphodiesterase 9A                                                                                         | 1             |           |             |            |            | -1.75      |             |                                                  |            |            |
| 18578   | Pde4b    | phosphodiesterase 4B, cAMP specific                                                                          | 1             |           | -1.44       |            |            |            |             |                                                  |            |            |
| 211948  | Pde12    | phosphodiesterase 12                                                                                         | 1             |           |             |            |            | 1.62       |             |                                                  |            |            |
| 18570   | Pdcd6    | programmed cell death 6                                                                                      | 1             |           |             |            |            | 1.21       |             |                                                  |            |            |
| 18551   | Pcsk4    | proprotein convertase subtilisin/kexin type 4                                                                | 1             |           | 1.31        |            |            |            |             |                                                  |            |            |
| 18546   | Pcp4     | Purkinje cell protein 4                                                                                      | 1             |           | -1.50       |            |            |            |             |                                                  |            |            |
| 93874   | Pcdhb3   | protocadherin beta 3                                                                                         | 1             |           |             |            |            | 1.94       |             |                                                  |            |            |
| 23983   | Pcbp1    | poly(rC) binding protein 1                                                                                   | 1             |           |             |            |            | 1.20       |             |                                                  |            |            |
| 72562   | Pcbd2    | pterin 4 alpha carbinolamine dehydratase/dimerization cofactor of hepatocyte nuclear factor 1 alpha (TCF1) 2 | 1             |           |             |            |            | -1.39      |             |                                                  |            |            |
| 18516   | Pbx3     | pre B-cell leukemia transcription factor 3                                                                   | 1             |           |             |            |            | 1.75       |             |                                                  |            |            |
| 66923   | Pbrm1    | polybromo 1                                                                                                  | 1             |           |             |            |            | 1.22       |             |                                                  |            |            |
| 243771  | Parp12   | poly (ADP-ribose) polymerase family, member 12                                                               | 1             |           |             |            |            | 1.31       |             |                                                  |            |            |
| 101187  | Parp11   | poly (ADP-ribose) polymerase family, member 11                                                               | 1             |           |             |            |            | 1.58       |             |                                                  |            |            |
| 93737   | Pard6g   | par-6 partitioning defective 6 homolog gamma (C. elegans)                                                    | 1             |           |             |            |            | -1.27      |             |                                                  |            |            |
| 71904   | Paqr7    | progesterin and adipoQ receptor family member VII                                                            | 1             |           |             |            |            | -1.49      |             |                                                  |            |            |
| 55991   | Panx1    | pannexin 1                                                                                                   | 1             |           |             |            |            | 2.01       |             |                                                  |            |            |
| 210622  | Pamr1    | peptidase domain containing associated with muscle regeneration 1                                            | 1             |           |             |            |            | -1.87      |             |                                                  |            |            |
| 70584   | Pak4     | p21 protein (Cdc42/Rac)-activated kinase 4                                                                   | 1             |           |             |            |            | -1.37      |             |                                                  |            |            |
| 18481   | Pak3     | p21 protein (Cdc42/Rac)-activated kinase 3                                                                   | 1             |           | -1.74       |            |            |            |             |                                                  |            |            |
| 18451   | P4ha1    | procollagen-proline, 2-oxoglutarate 4-dioxygenase (proline 4-hydroxylase), alpha 1 polypeptide               | 1             |           |             |            |            | -1.45      |             |                                                  |            |            |
| 14628   | Ostm1    | osteopetrosis associated transmembrane protein 1                                                             | 1             |           |             |            |            | 1.28       |             |                                                  |            |            |
| 66844   | Ormdl2   | ORM1-like 2 (S. cerevisiae)                                                                                  | 1             |           |             |            |            | 1.44       |             |                                                  |            |            |
| 227102  | Ormdl1   | ORM1-like 1 (S. cerevisiae)                                                                                  | 1             |           |             |            |            | 1.79       |             |                                                  |            |            |
| 216157  | ORF61    | open reading frame 61                                                                                        | 1             |           |             |            |            | -1.25      |             |                                                  |            |            |
| 94190   | Ophn1    | oligophrenin 1                                                                                               | 1             |           |             |            |            | -1.39      |             |                                                  |            |            |
| 27047   | Omd      | osteonodulin                                                                                                 | 1             |           |             |            |            | -2.63      |             |                                                  |            |            |
| 18263   | Odc1     | ornithine decarboxylase, structural 1                                                                        | 1             |           |             |            |            | -1.73      |             |                                                  |            |            |
| 98733   | Obsl1    | obscurin-like 1                                                                                              | 1             |           |             |            |            | -1.38      |             |                                                  |            |            |
| 18242   | Oat      | ornithine aminotransferase                                                                                   | 1             |           |             |            |            | 1.63       |             |                                                  |            |            |
| 18230   | Nxn      | nucleoredoxin                                                                                                | 1             |           |             |            |            | -1.51      |             |                                                  |            |            |
| 68051   | Nuff2    | nuclear transport factor 2                                                                                   | 1             |           | -1.28       |            |            |            |             |                                                  |            |            |
| 218210  | Nup153   | nucleoporin 153                                                                                              | 1             |           |             |            |            | 1.84       |             |                                                  |            |            |
| 68564   | Nufip2   | nuclear fragile X mental retardation protein interacting protein 2                                           | 1             |           |             |            |            | 1.32       |             |                                                  |            |            |
| 18208   | Ntn1     | netrin 1                                                                                                     | 1             |           |             |            |            | -1.32      |             |                                                  |            |            |
| 18203   | Ntan1    | N-terminal Asn amidase                                                                                       | 1             |           |             |            |            | -1.18      |             |                                                  |            |            |
| 103850  | Nt5m     | 5',3'-nucleotidase, mitochondrial                                                                            | 1             |           |             |            |            | -1.34      |             |                                                  |            |            |
| 18194   | Nsdhl    | NAD(P) dependent steroid dehydrogenase-like                                                                  | 1             |           |             |            |            | -1.49      |             |                                                  |            |            |
| 106582  | Nrm      | nurim (nuclear envelope membrane protein)                                                                    | 1             |           |             |            |            | 2.22       |             |                                                  |            |            |
| 27206   | Nrk      | Nik related kinase                                                                                           | 1             |           |             |            |            | -4.80      |             |                                                  |            |            |
| 268903  | Nrip1    | nuclear receptor interacting protein 1                                                                       | 1             |           |             |            |            | 1.52       |             |                                                  |            |            |
| 18227   | Nr4a2    | nuclear receptor subfamily 4, group A, member 2                                                              | 1             |           |             |            |            | -1.22      |             |                                                  |            |            |
| 18159   | Nppc     | natriuretic peptide type C                                                                                   | 1             |           |             |            |            | -1.56      |             |                                                  |            |            |
| 108176  | Npm3-ps1 | nucleoplasm 3, pseudogene 1                                                                                  | 1             |           |             |            |            | 1.54       |             |                                                  |            |            |
| 74091   | Npl      | N-acetylneuraminate pyruvate lyase                                                                           | 1             |           |             |            |            | 1.58       |             |                                                  |            |            |
| 54615   | Npff     | neuropeptide FF-amide peptide precursor                                                                      | 1             |           |             |            |            | -1.72      |             |                                                  |            |            |
| 70769   | Nolc1    | nucleolar and coiled-body phosphoprotein 1                                                                   | 1             |           |             |            |            | 1.23       |             |                                                  |            |            |
| 226518  | Nmnat2   | nicotinamide nucleotide adenyltransferase 2                                                                  | 1             |           | -1.75       |            |            |            |             |                                                  |            |            |
| 75533   | Nme5     | non-metastatic cells 5, protein expressed in (nucleoside-diphosphate kinase)                                 | 1             |           |             |            |            | -1.39      |             |                                                  |            |            |
| 79059   | Nme3     | non-metastatic cells 3, protein expressed in                                                                 | 1             |           |             |            |            | 1.55       |             |                                                  |            |            |
| 70701   | Nipa1    | NIPA-like domain containing 1                                                                                | 1             |           |             |            |            | -1.34      |             |                                                  |            |            |
| 93790   | Nipa2    | non imprinted in Prader-Willi/Angelman syndrome 2 homolog (human)                                            | 1             |           |             |            |            | 1.70       |             |                                                  |            |            |
| 105193  | Nhlrc1   | NHL repeat containing 1                                                                                      | 1             |           |             |            |            | -1.38      |             |                                                  |            |            |
| 56748   | Nfu1     | NFU1 iron-sulfur cluster scaffold homolog (S. cerevisiae)                                                    | 1             |           |             |            |            | 1.24       |             |                                                  |            |            |
| 18037   | Nfkbie   | nuclear factor of kappa light polypeptide gene enhancer in B-cells inhibitor, epsilon                        | 1             |           |             |            |            | 2.38       |             |                                                  |            |            |
| 18007   | Neo1     | neogenin                                                                                                     | 1             |           |             |            |            | -1.32      |             |                                                  |            |            |
| 54003   | Nell2    | NEL-like 2 (chicken)                                                                                         | 1             |           |             |            |            | -1.45      |             |                                                  |            |            |

| Gene ID | Symbol   | Description                                                                                                                          | DEG/Set count | 2mWT_2mKO | 20mWT_20mKO | 2mKO_20mKO | 2mWT_20mWT | 2mWT_30mWT | 20mWT_30mWT | Literature-Mining (Aging-Cholesterol literature) |            |            |
|---------|----------|--------------------------------------------------------------------------------------------------------------------------------------|---------------|-----------|-------------|------------|------------|------------|-------------|--------------------------------------------------|------------|------------|
|         |          |                                                                                                                                      |               | 9         | 230         | 406        | 48         | 1904       | 1157        | #Paper                                           | Enrichment | BH P-value |
| 56876   | Nelf     | nasal embryonic LHRH factor                                                                                                          | 1             |           |             |            |            |            |             |                                                  |            |            |
| 104130  | Ndufb11  | NADH dehydrogenase (ubiquinone) 1 beta subcomplex, 11                                                                                | 1             |           |             |            |            | 1.35       |             |                                                  |            |            |
| 68202   | Ndufa5   | NADH dehydrogenase (ubiquinone) 1 alpha subcomplex, 5                                                                                | 1             |           |             |            |            | -1.24      |             |                                                  |            |            |
| 67203   | Nde1     | nuclear distribution gene E homolog 1 (A nidulans)                                                                                   | 1             |           |             |            |            | -1.20      |             |                                                  |            |            |
| 320024  | Nceh1    | arylacetamide deacetylase-like 1                                                                                                     | 1             |           |             |            |            | 1.48       |             |                                                  |            |            |
| 68298   | Ncapd2   | non-SMC condensin I complex, subunit D2                                                                                              | 1             |           | 1.42        |            |            |            |             |                                                  |            |            |
| 72560   | Naalad2  | N-acetylated alpha-linked acidic dipeptidase 2                                                                                       | 1             |           |             |            |            | -1.79      |             |                                                  |            |            |
| 72117   | Naa50    | N(alpha)-acetyltransferase 50, NatE catalytic subunit                                                                                | 1             |           |             |            |            | 1.31       |             |                                                  |            |            |
| 56292   | Naa10    | N(alpha)-acetyltransferase 10, NatA catalytic subunit                                                                                | 1             |           |             |            |            | 1.38       |             |                                                  |            |            |
| 245049  | Myrip    | myosin VIIA and Rab interacting protein                                                                                              | 1             |           |             |            |            | -1.62      |             |                                                  |            |            |
| 17926   | Myoc     | myocilin                                                                                                                             | 1             |           |             |            |            | -1.56      |             |                                                  |            |            |
| 17919   | Myo5b    | myosin VB                                                                                                                            | 1             |           |             |            |            | -1.89      |             |                                                  |            |            |
| 17918   | Myo5a    | myosin VA                                                                                                                            | 1             |           |             |            |            | 2.10       |             |                                                  |            |            |
| 17909   | Myo10    | myosin X                                                                                                                             | 1             |           |             |            |            | 1.35       |             |                                                  |            |            |
| 74761   | Mxra8    | matrix-remodelling associated 8                                                                                                      | 1             |           |             |            |            | -1.37      |             |                                                  |            |            |
| 67622   | Mxra7    | matrix-remodelling associated 7                                                                                                      | 1             |           |             |            |            | -1.35      |             |                                                  |            |            |
| 17122   | Mxd4     | Max dimerization protein 4                                                                                                           | 1             |           |             |            |            | -1.54      |             |                                                  |            |            |
| 17772   | Mtm1     | X-linked myotubular myopathy gene 1                                                                                                  | 1             |           |             |            |            | 1.97       |             |                                                  |            |            |
| 108156  | Mthfd1   | methylenetetrahydrofolate dehydrogenase (NADP+ dependent), methylenetetrahydrofolate cyclohydrolase, formyltetrahydrofolate synthase | 1             |           |             |            |            | -1.30      |             |                                                  |            |            |
| 23942   | Mta2     | metastasis-associated gene family, member 2                                                                                          | 1             |           |             |            |            | 1.57       |             |                                                  |            |            |
| 17751   | Mt3      | metallothionein 3                                                                                                                    | 1             |           |             |            |            | -1.70      |             |                                                  |            |            |
| 545279  | Ms4a15   | membrane-spanning 4-domains, subfamily A, member 15                                                                                  | 1             |           |             |            |            | -1.38      |             |                                                  |            |            |
| 79044   | Mrps34   | mitochondrial ribosomal protein S34                                                                                                  | 1             |           |             |            |            | 1.26       |             |                                                  |            |            |
| 64660   | Mrps24   | mitochondrial ribosomal protein S24                                                                                                  | 1             |           |             |            |            | -1.26      |             |                                                  |            |            |
| 68565   | Mrps18a  | mitochondrial ribosomal protein S18A                                                                                                 | 1             |           |             |            |            | 1.38       |             |                                                  |            |            |
| 67994   | Mrps11   | mitochondrial ribosomal protein S11                                                                                                  | 1             |           |             |            |            | 1.40       |             |                                                  |            |            |
| 94066   | Mrpl36   | mitochondrial ribosomal protein L36                                                                                                  | 1             |           |             |            |            | 1.16       |             |                                                  |            |            |
| 67707   | Mrpl24   | mitochondrial ribosomal protein L24                                                                                                  | 1             |           |             |            |            | 1.23       |             |                                                  |            |            |
| 66448   | Mrpl20   | mitochondrial ribosomal protein L20                                                                                                  | 1             |           |             |            |            | 1.52       |             |                                                  |            |            |
| 67681   | Mrpl18   | mitochondrial ribosomal protein L18                                                                                                  | 1             |           |             |            |            | 1.43       |             |                                                  |            |            |
| 246221  | Mpst     | mercaptopyruvate sulfurtransferase                                                                                                   | 1             |           |             |            |            | 1.97       |             |                                                  |            |            |
| 70380   | Mospd1   | motile sperm domain containing 1                                                                                                     | 1             |           |             |            |            | 1.41       |             |                                                  |            |            |
| 67247   | Mosc2    | MOCO sulphurase C-terminal domain containing 2                                                                                       | 1             |           |             |            |            | -1.32      |             |                                                  |            |            |
| 378462  | Morn2    | MORN repeat containing 2                                                                                                             | 1             |           |             |            |            | -1.41      |             |                                                  |            |            |
| 77697   | Mmab     | methylmalonic aciduria (cobalamin deficiency) type B homolog (human)                                                                 | 1             |           |             |            |            | -1.45      |             |                                                  |            |            |
| 210719  | Mkx      | mohawk homeobox                                                                                                                      | 1             |           | -2.05       |            |            |            |             |                                                  |            |            |
| 59090   | Midn     | midnolin                                                                                                                             | 1             |           |             |            |            | 1.30       |             |                                                  |            |            |
| 76580   | Mib2     | mindbomb homolog 2 (Drosophila)                                                                                                      | 1             |           |             |            |            | -1.45      |             |                                                  |            |            |
| 216864  | Mgl2     | macrophage galactose N-acetyl-galactosamine specific lectin 2                                                                        | 1             |           |             |            |            | -2.23      |             |                                                  |            |            |
| 269181  | Mgat4a   | mannoside acetylglucosaminyltransferase 4, isoenzyme A                                                                               | 1             |           |             |            |            | 1.60       |             |                                                  |            |            |
| 217721  | Mfsd7c   | major facilitator superfamily domain containing 7C                                                                                   | 1             |           |             |            |            | -2.01      |             |                                                  |            |            |
| 69900   | Mfsd11   | major facilitator superfamily domain containing 11                                                                                   | 1             |           |             |            |            | 1.51       |             |                                                  |            |            |
| 66868   | Mfsd1    | major facilitator superfamily domain containing 1                                                                                    | 1             |           |             |            |            | 1.32       |             |                                                  |            |            |
| 30060   | Mfi2     | antigen p97 (melanoma associated) identified by monoclonal antibodies 133.2 and 96.5                                                 | 1             |           |             |            |            | -1.53      |             |                                                  |            |            |
| 76293   | Mfap4    | microfibrillar-associated protein 4                                                                                                  | 1             |           |             |            |            | -4.69      |             |                                                  |            |            |
| 56335   | Mettl3   | methyltransferase like 3                                                                                                             | 1             |           |             |            |            | -1.18      |             |                                                  |            |            |
| 17289   | Mertk    | c-mer proto-oncogene tyrosine kinase                                                                                                 | 1             |           |             |            |            | 1.94       |             |                                                  |            |            |
| 76890   | Memo1    | mediator of cell motility 1                                                                                                          | 1             |           |             |            |            | 1.48       |             |                                                  |            |            |
| 70417   | Megf10   | multiple EGF-like-domains 10                                                                                                         | 1             |           |             |            |            | 1.60       |             |                                                  |            |            |
| 20933   | Med22    | mediator complex subunit 22                                                                                                          | 1             |           |             |            |            | -1.42      |             |                                                  |            |            |
| 17219   | Mcm6     | minichromosome maintenance deficient 6 (MIS5 homolog, S. pombe) (S. cerevisiae)                                                      | 1             |           | 1.46        |            |            |            |             |                                                  |            |            |
| 230125  | Mcart1   | mitochondrial carrier triple repeat 1                                                                                                | 1             |           |             |            |            | 1.23       |             |                                                  |            |            |
| 84004   | Mcam     | melanoma cell adhesion molecule                                                                                                      | 1             |           |             |            |            | 1.61       |             |                                                  |            |            |
| 77582   | Mboat7   | membrane bound O-acyltransferase domain containing 7                                                                                 | 1             |           |             |            |            | -1.17      |             |                                                  |            |            |
| 26390   | Mapkbp1  | mitogen-activated protein kinase binding protein 1                                                                                   | 1             |           |             |            |            | -1.52      |             |                                                  |            |            |
| 227743  | Mapkap1  | mitogen-activated protein kinase associated protein 1                                                                                | 1             |           |             |            |            | -1.22      |             |                                                  |            |            |
| 23939   | Mapk7    | mitogen-activated protein kinase 7                                                                                                   | 1             |           |             |            |            | -1.29      |             |                                                  |            |            |
| 69546   | Mapk1ip1 | mitogen-activated protein kinase 1 interacting protein 1                                                                             | 1             |           |             |            |            | -1.35      |             |                                                  |            |            |
| 227619  | Man1b1   | mannosidase, alpha, class 1B, member 1                                                                                               | 1             |           |             |            |            | -1.38      |             |                                                  |            |            |
| 17153   | Mal      | myelin and lymphocyte protein, T-cell differentiation protein                                                                        | 1             |           |             |            |            | -1.23      |             |                                                  |            |            |
| 75625   | Mageh1   | melanoma antigen, family H, 1                                                                                                        | 1             |           |             |            |            | 1.43       |             |                                                  |            |            |
| 80884   | Maged2   | melanoma antigen, family D, 2                                                                                                        | 1             |           |             |            |            | -1.50      |             |                                                  |            |            |
| 18777   | Lypla1   | lysophospholipase 1                                                                                                                  | 1             |           |             |            |            | 1.68       |             |                                                  |            |            |
| 17089   | Lyar     | Ly1 antibody reactive clone                                                                                                          | 1             |           |             |            |            | -1.29      |             |                                                  |            |            |

| Gene ID   | Symbol       | Description                                                                 | DEG/Set count | 2mWT_2mKO | 20mWT_20mKO | 2mKO_20mKO | 2mWT_20mWT | 2mWT_30mWT | 20mWT_30mWT | Literature-Mining (Aging-Cholesterol literature) |            |            |
|-----------|--------------|-----------------------------------------------------------------------------|---------------|-----------|-------------|------------|------------|------------|-------------|--------------------------------------------------|------------|------------|
|           |              |                                                                             |               | 9         | 230         | 406        | 48         | 1904       | 1157        | #Paper                                           | Enrichment | BH P-value |
| 17084     | Ly86         | lymphocyte antigen 86                                                       | 1             |           |             |            |            | 1.66       |             |                                                  |            |            |
| 114654    | Ly6g6d       | lymphocyte antigen 6 complex, locus G6D                                     | 1             |           |             |            |            | -1.37      |             |                                                  |            |            |
| 17069     | Ly6e         | lymphocyte antigen 6 complex, locus E                                       | 1             |           |             |            |            | 1.31       |             |                                                  |            |            |
| 16997     | Ltbp2        | latent transforming growth factor beta binding protein 2                    | 1             |           | 2.30        |            |            |            |             |                                                  |            |            |
| 16981     | Lrrn3        | leucine rich repeat protein 3, neuronal                                     | 1             |           |             |            |            | -1.51      |             |                                                  |            |            |
| 241568    | Lrrc4c       | leucine rich repeat containing 4C                                           | 1             |           | -1.33       |            |            |            |             |                                                  |            |            |
| 102747    | Lrrc49       | leucine rich repeat containing 49                                           | 1             |           | -2.00       |            |            |            |             |                                                  |            |            |
| 67867     | Lrrc28       | leucine rich repeat containing 28                                           | 1             |           |             |            |            | -1.24      |             |                                                  |            |            |
| 64898     | Lpin2        | lipin 2                                                                     | 1             |           |             |            |            | 1.51       |             |                                                  |            |            |
| 99633     | Lphn2        | latrophilin 2                                                               | 1             |           |             |            |            | 1.35       |             |                                                  |            |            |
| 100503890 | LOC100503890 | RIKEN cDNA 2900053A13 gene                                                  | 1             |           |             |            |            | -1.29      |             |                                                  |            |            |
| 100503337 | LOC100503337 | predicted gene 9895                                                         | 1             |           |             |            |            | -1.73      |             |                                                  |            |            |
| 100503057 | LOC100503057 | uncharacterized LOC100503057                                                | 1             |           |             |            |            | -1.77      |             |                                                  |            |            |
| 381236    | Lipo1        | lipase, member O1                                                           | 1             |           |             |            |            | 1.64       |             |                                                  |            |            |
| 225341    | Lims2        | LIM and senescent cell antigen like domains 2                               | 1             |           |             |            |            | -1.31      |             |                                                  |            |            |
| 16859     | Lgals9       | lectin, galactose binding, soluble 9                                        | 1             |           |             |            |            | 1.49       |             |                                                  |            |            |
| 56401     | Lepre1       | leprecan 1                                                                  | 1             |           |             |            |            | -1.44      |             |                                                  |            |            |
| 69757     | Leng1        | leukocyte receptor cluster (LRC) member 1                                   | 1             |           |             |            |            | -1.61      |             |                                                  |            |            |
| 223732    | Ldoc1l       | leucine zipper, down-regulated in cancer 1-like                             | 1             |           |             |            |            | -1.44      |             |                                                  |            |            |
| 18826     | Lcp1         | lymphocyte cytosolic protein 1                                              | 1             |           |             |            |            | 2.62       |             |                                                  |            |            |
| 329504    | Lcmt2        | leucine carboxyl methyltransferase 2                                        | 1             |           |             |            |            | 1.31       |             |                                                  |            |            |
| 225010    | Lclat1       | lysocardiolipin acyltransferase 1                                           | 1             |           |             |            |            | 1.40       |             |                                                  |            |            |
| 66344     | Lce3b        | late cornified envelope 3B                                                  | 1             |           |             |            |            | -1.41      |             |                                                  |            |            |
| 16803     | Lbp          | lipopolysaccharide binding protein                                          | 1             |           |             |            |            | -1.74      |             |                                                  |            |            |
| 16796     | Lasp1        | LIM and SH3 protein 1                                                       | 1             |           |             |            |            | -1.30      |             |                                                  |            |            |
| 76130     | Las1l        | LAS1-like (S. cerevisiae)                                                   | 1             |           |             |            |            | -1.24      |             |                                                  |            |            |
| 217980    | Larp4b       | La ribonucleoprotein domain family, member 4B                               | 1             |           |             |            |            | 1.21       |             |                                                  |            |            |
| 236285    | Lancl3       | LanC lantibiotic synthetase component C-like 3 (bacterial)                  | 1             |           | -2.07       |            |            |            |             |                                                  |            |            |
| 16777     | Lamb1        | laminin B1                                                                  | 1             |           | 1.26        |            |            |            |             |                                                  |            |            |
| 69815     | Krtcap3      | keratinocyte associated protein 3                                           | 1             |           |             |            |            | -1.29      |             |                                                  |            |            |
| 68239     | Krt42        | keratin 42                                                                  | 1             |           |             |            |            | -1.51      |             |                                                  |            |            |
| 16670     | Krt32        | keratin 32                                                                  | 1             |           |             |            |            | -1.48      |             |                                                  |            |            |
| 66809     | Krt20        | keratin 20                                                                  | 1             |           |             |            |            | -1.91      |             |                                                  |            |            |
| 16648     | Kpna3        | karyopherin (importin) alpha 3                                              | 1             |           |             |            |            | 1.38       |             |                                                  |            |            |
| 16646     | Kpna1        | karyopherin (importin) alpha 1                                              | 1             |           |             |            |            | 1.31       |             |                                                  |            |            |
| 16631     | Klra13-ps    | killer cell lectin-like receptor subfamily A, member 13, pseudogene         | 1             |           |             |            |            | -1.67      |             |                                                  |            |            |
| 16604     | Klk1b7-ps    | kallikrein 1-related peptidase b7, pseudogene                               | 1             |           |             |            |            | -1.51      |             |                                                  |            |            |
| 234378    | Klhl26       | kelch-like 26 (Drosophila)                                                  | 1             |           |             |            |            | -1.23      |             |                                                  |            |            |
| 277396    | Klhl23       | kelch-like 23 (Drosophila)                                                  | 1             |           |             |            |            | -1.62      |             |                                                  |            |            |
| 231003    | Klhl17       | kelch-like 17 (Drosophila)                                                  | 1             |           |             |            |            | -1.31      |             |                                                  |            |            |
| 232943    | Klc3         | kinesin light chain 3                                                       | 1             |           |             |            |            | 1.46       |             |                                                  |            |            |
| 16576     | Kif7         | kinesin family member 7                                                     | 1             |           |             |            |            | -1.33      |             |                                                  |            |            |
| 75605     | Kdm5b        | lysine (K)-specific demethylase 5B                                          | 1             |           |             |            |            | -1.33      |             |                                                  |            |            |
| 67516     | Kctd4        | potassium channel tetramerisation domain containing 4                       | 1             |           |             |            |            | -1.38      |             |                                                  |            |            |
| 16511     | Kcnh2        | potassium voltage-gated channel, subfamily H (eag-related), member 2        | 1             |           | -1.39       |            |            |            |             |                                                  |            |            |
| 16502     | Kcnc1        | potassium voltage gated channel, Shaw-related subfamily, member 1           | 1             |           | -2.14       |            |            |            |             |                                                  |            |            |
| 242553    | Kank4        | KN motif and ankyrin repeat domains 4                                       | 1             |           |             |            |            | -1.17      |             |                                                  |            |            |
| 235041    | Kank2        | KN motif and ankyrin repeat domains 2                                       | 1             |           |             |            |            | -1.24      |             |                                                  |            |            |
| 338523    | Jhdm1d       | jumonji C domain-containing histone demethylase 1 homolog D (S. cerevisiae) | 1             |           |             |            |            | 1.51       |             |                                                  |            |            |
| 16451     | Jak1         | Janus kinase 1                                                              | 1             |           |             |            |            | 1.40       |             |                                                  |            |            |
| 67767     | Jagn1        | jagunal homolog 1 (Drosophila)                                              | 1             |           |             |            |            | 1.23       |             |                                                  |            |            |
| 16449     | Jag1         | jagged 1                                                                    | 1             |           |             |            |            | -1.39      |             |                                                  |            |            |
| 16431     | Itm2a        | integral membrane protein 2A                                                | 1             |           |             |            |            | -1.61      |             |                                                  |            |            |
| 16400     | Itga3        | integrin alpha 3                                                            | 1             |           |             |            |            | -1.34      |             |                                                  |            |            |
| 75847     | Ispd         | isoprenoid synthase domain containing                                       | 1             |           |             |            |            | 1.71       |             |                                                  |            |            |
| 15944     | Irgm1        | immunity-related GTPase family M member 1                                   | 1             |           |             |            |            | 1.87       |             |                                                  |            |            |
| 108960    | Irak2        | interleukin-1 receptor-associated kinase 2                                  | 1             |           |             |            |            | 2.31       |             |                                                  |            |            |
| 232227    | Iqsec1       | IQ motif and Sec7 domain 1                                                  | 1             |           |             |            |            | -1.19      |             |                                                  |            |            |
| 16190     | Il4ra        | interleukin 4 receptor, alpha                                               | 1             |           |             |            |            | 1.50       |             |                                                  |            |            |
| 16186     | Il2rg        | interleukin 2 receptor, gamma chain                                         | 1             |           |             |            |            | 5.29       |             |                                                  |            |            |
| 16172     | Il17ra       | interleukin 17 receptor A                                                   | 1             |           |             |            |            | 2.12       |             |                                                  |            |            |
| 16170     | Il16         | interleukin 16                                                              | 1             |           |             |            |            | -1.36      |             |                                                  |            |            |
| 67454     | Ikbip        | IKKB interacting protein                                                    | 1             |           |             |            |            | -1.32      |             |                                                  |            |            |
| 16069     | Igj          | immunoglobulin joining chain                                                | 1             |           |             |            |            | 28.96      |             |                                                  |            |            |
| 18518     | Igbbp1       | immunoglobulin (CD79A) binding protein 1                                    | 1             |           |             |            |            | 1.46       |             |                                                  |            |            |
| 15939     | Ier5         | immediate early response 5                                                  | 1             |           |             |            |            | 1.40       |             |                                                  |            |            |
| 15937     | Ier3         | immediate early response 3                                                  | 1             |           |             |            |            | 1.82       |             |                                                  |            |            |
| 15903     | Id3          | inhibitor of DNA binding 3                                                  | 1             |           |             |            |            | 1.43       |             |                                                  |            |            |
| 105148    | Iars         | isoleucine-tRNA synthetase                                                  | 1             |           |             |            |            | 1.37       |             |                                                  |            |            |
| 67732     | Iah1         | isoamyl acetate-hydrolyzing esterase 1 homolog (S. cerevisiae)              | 1             |           |             |            |            | 1.23       |             |                                                  |            |            |
| 64704     | Htra2        | HtrA serine peptidase 2                                                     | 1             |           |             |            |            | -1.23      |             |                                                  |            |            |
| 15512     | Hspa2        | heat shock protein 2                                                        | 1             |           |             |            |            | 1.36       |             |                                                  |            |            |
| 72630     | Hspa12b      | heat shock protein 12B                                                      | 1             |           |             |            |            | -1.71      |             |                                                  |            |            |
| 15473     | Hrsp12       | heat-responsive protein 12                                                  | 1             |           |             |            |            | 1.53       |             |                                                  |            |            |
| 15446     | Hpgd         | hydroxyprostaglandin dehydrogenase 15 (NAD)                                 | 1             |           |             |            |            | -1.45      |             |                                                  |            |            |
| 15438     | Hoxd9        | homeobox D9                                                                 | 1             |           | -1.33       |            |            |            |             |                                                  |            |            |

| Gene ID   | Symbol    | Description                                                               | DEG/Set count | 2mWT_2mKO | 20mWT_20mKO | 2mKO_20mKO | 2mWT_20mWT | 2mWT_30mWT | 20mWT_30mWT | Literature-Mining (Aging-Cholesterol literature) |            |            |  |  |
|-----------|-----------|---------------------------------------------------------------------------|---------------|-----------|-------------|------------|------------|------------|-------------|--------------------------------------------------|------------|------------|--|--|
|           |           |                                                                           |               | 9         | 230         | 406        | 48         | 1904       | 1157        | #Paper                                           | Enrichment | BH P-value |  |  |
| 15402     | Hoxa5     | homeobox A5                                                               | 1             |           |             |            |            |            |             |                                                  |            |            |  |  |
| 26557     | Homer2    | homer homolog 2 (Drosophila)                                              | 1             |           |             |            |            |            |             |                                                  |            |            |  |  |
| 15384     | Hnmpab    | heterogeneous nuclear ribonucleoprotein A/B                               | 1             |           |             |            |            |            |             |                                                  |            |            |  |  |
| 15273     | Hivep2    | human immunodeficiency virus type 1 enhancer binding protein 2            | 1             |           |             |            |            |            |             |                                                  |            |            |  |  |
| 319190    | Hist2h2be | histone cluster 2, H2be                                                   | 1             |           |             |            |            |            |             |                                                  |            |            |  |  |
| 71059     | Hexim2    | hexamethylene bis-acetamide inducible 2                                   | 1             |           |             |            |            |            |             |                                                  |            |            |  |  |
| 223658    | Heatr7a   | HEAT repeat containing 7A                                                 | 1             |           |             |            |            |            |             |                                                  |            |            |  |  |
| 29877     | Hdgfrp3   | hepatoma-derived growth factor, related protein 3                         | 1             |           |             |            |            |            |             |                                                  |            |            |  |  |
| 208727    | Hdac4     | histone deacetylase 4                                                     | 1             |           |             |            |            |            |             |                                                  |            |            |  |  |
| 330790    | Hapln4    | hyaluronan and proteoglycan link protein 4                                | 1             |           |             |            |            |            |             |                                                  |            |            |  |  |
| 56794     | Hacl1     | 2-hydroxyacyl-CoA lyase 1                                                 | 1             |           |             |            |            |            |             |                                                  |            |            |  |  |
| 77605     | H2afv     | H2A histone family, member V                                              | 1             |           |             |            |            |            |             |                                                  |            |            |  |  |
| 14955     | H19       | H19 fetal liver mRNA                                                      | 1             |           |             |            |            |            |             |                                                  |            |            |  |  |
| 232493    | Cys2      | glycogen synthase 2                                                       | 1             |           |             |            |            |            |             |                                                  |            |            |  |  |
| 107999    | Gtpbp6    | GTP binding protein 6 (putative)                                          | 1             |           |             |            |            |            |             |                                                  |            |            |  |  |
| 14894     | Gt13      | gene trap locus 3                                                         | 1             |           |             |            |            |            |             |                                                  |            |            |  |  |
| 98053     | Gtf2f1    | general transcription factor IIF, polypeptide 1                           | 1             |           |             |            |            |            |             |                                                  |            |            |  |  |
| 68153     | Gtf2e2    | general transcription factor II E, polypeptide 2 (beta subunit)           | 1             |           |             |            |            |            |             |                                                  |            |            |  |  |
| 235459    | Gtf2a2    | general transcription factor II A, 2                                      | 1             |           |             |            |            |            |             |                                                  |            |            |  |  |
| 68214     | Gsto2     | glutathione S-transferase omega 2                                         | 1             |           |             |            |            |            |             |                                                  |            |            |  |  |
| 68312     | Gstm7     | glutathione S-transferase, mu 7                                           | 1             |           |             |            |            |            |             |                                                  |            |            |  |  |
| 227753    | Gsn       | gelsolin                                                                  | 1             |           |             |            |            |            |             |                                                  |            |            |  |  |
| 382034    | Gse1      | genetic suppressor element 1                                              | 1             |           |             |            |            |            |             |                                                  |            |            |  |  |
| 231413    | Grsf1     | G-rich RNA sequence binding factor 1                                      | 1             |           |             |            |            |            |             |                                                  |            |            |  |  |
| 28015     | Grin1a    | polymerase (RNA) II (DNA directed) polypeptide M                          | 1             |           |             |            |            |            |             |                                                  |            |            |  |  |
| 170483    | Grin3b    | glutamate receptor, ionotropic, NMDA3B                                    | 1             |           |             |            |            |            |             |                                                  |            |            |  |  |
| 14809     | Grik5     | glutamate receptor, ionotropic, kainate 5 (gamma 2)                       | 1             |           |             |            |            |            |             |                                                  |            |            |  |  |
| 14790     | Grcc10    | gene rich cluster, C10 gene                                               | 1             |           |             |            |            |            |             |                                                  |            |            |  |  |
| 67839     | Gpsm1     | G-protein signalling modulator 1 (AGS3-like, C. elegans)                  | 1             |           |             |            |            |            |             |                                                  |            |            |  |  |
| 64095     | Gpr35     | G protein-coupled receptor 35                                             | 1             |           |             |            |            |            |             |                                                  |            |            |  |  |
| 239530    | Gpr20     | G protein-coupled receptor 20                                             | 1             |           |             |            |            |            |             |                                                  |            |            |  |  |
| 58245     | Gpr180    | G protein-coupled receptor 180                                            | 1             |           |             |            |            |            |             |                                                  |            |            |  |  |
| 269053    | Gpr152    | G protein-coupled receptor 152                                            | 1             |           |             |            |            |            |             |                                                  |            |            |  |  |
| 100210    | Gpn2      | GPN-loop GTPase 2                                                         | 1             |           |             |            |            |            |             |                                                  |            |            |  |  |
| 14733     | Gpc1      | glypican 1                                                                | 1             |           |             |            |            |            |             |                                                  |            |            |  |  |
| 70231     | Gorasp2   | golgi reassembly stacking protein 2                                       | 1             |           |             |            |            |            |             |                                                  |            |            |  |  |
| 71146     | Golga7b   | golgi autoantigen, golgin subfamily a, 7B                                 | 1             |           |             |            |            |            |             |                                                  |            |            |  |  |
| 30877     | Gnl3      | guanine nucleotide binding protein-like 3 (nucleolar)                     | 1             |           |             |            |            |            |             |                                                  |            |            |  |  |
| 14694     | Gnb211    | guanine nucleotide binding protein (G protein), beta polypeptide 2 like 1 | 1             |           |             |            |            |            |             |                                                  |            |            |  |  |
| 14674     | Gna13     | guanine nucleotide binding protein, alpha 13                              | 1             |           |             |            |            |            |             |                                                  |            |            |  |  |
| 668339    | Gm9112    | predicted gene 9112                                                       | 1             |           |             |            |            |            |             |                                                  |            |            |  |  |
| 546143    | Gm5918    | predicted gene 5918                                                       | 1             |           |             |            |            |            |             |                                                  |            |            |  |  |
| 242037    | Gm410     | predicted gene 410                                                        | 1             |           |             |            |            |            |             |                                                  |            |            |  |  |
| 241289    | Gm347     | protein phosphatase 1, regulatory subunit 26                              | 1             |           |             |            |            |            |             |                                                  |            |            |  |  |
| 100040297 | Gm2695    | predicted gene 2695                                                       | 1             |           |             |            |            |            |             |                                                  |            |            |  |  |
| 100504674 | Gm20346   | predicted gene, 20346                                                     | 1             |           |             |            |            |            |             |                                                  |            |            |  |  |
| 100504048 | Gm20033   | predicted gene, 20033                                                     | 1             |           |             |            |            |            |             |                                                  |            |            |  |  |
| 100503686 | Gm19831   | predicted gene, 19831                                                     | 1             |           |             |            |            |            |             |                                                  |            |            |  |  |
| 100504345 | Gm17456   | predicted gene, 17456                                                     | 1             |           |             |            |            |            |             |                                                  |            |            |  |  |
| 100503986 | Gm17227   | predicted gene 17227                                                      | 1             |           |             |            |            |            |             |                                                  |            |            |  |  |
| 24083     | Gm16515   | predicted gene, Gm16515                                                   | 1             |           |             |            |            |            |             |                                                  |            |            |  |  |
| 100503471 | Gm15867   | predicted gene 15867                                                      | 1             |           |             |            |            |            |             |                                                  |            |            |  |  |
| 100042125 | Gm15535   | predicted gene 15535                                                      | 1             |           |             |            |            |            |             |                                                  |            |            |  |  |
| 100044509 | Gm14378   | predicted gene 14378                                                      | 1             |           |             |            |            |            |             |                                                  |            |            |  |  |
| 100036520 | Gm14318   | predicted gene 14318                                                      | 1             |           |             |            |            |            |             |                                                  |            |            |  |  |
| 100503381 | Gm14022   | predicted gene 14022                                                      | 1             |           |             |            |            |            |             |                                                  |            |            |  |  |
| 545681    | Gm12992   | predicted gene 12992                                                      | 1             |           |             |            |            |            |             |                                                  |            |            |  |  |
| 629750    | Gm11517   | ubiquitin A-52 residue ribosomal protein fusion product 1 pseudogene      | 1             |           |             |            |            |            |             |                                                  |            |            |  |  |
| 226866    | Gm106     | predicted gene 106                                                        | 1             |           |             |            |            |            |             |                                                  |            |            |  |  |
| 100038398 | Gm10567   | predicted gene 10567                                                      | 1             |           |             |            |            |            |             |                                                  |            |            |  |  |
| 328186    | Gm10336   | predicted gene 10336                                                      | 1             |           |             |            |            |            |             |                                                  |            |            |  |  |
| 68077     | Gltscr2   | glioma tumor suppressor candidate region gene 2                           | 1             |           |             |            |            |            |             |                                                  |            |            |  |  |
| 109801    | Glo1      | glyoxalase 1                                                              | 1             |           |             |            |            |            |             |                                                  |            |            |  |  |
| 170823    | Glmn      | glomulin, FKBP associated protein                                         | 1             |           |             |            |            |            |             |                                                  |            |            |  |  |
| 14622     | Gjb5      | gap junction protein, beta 5                                              | 1             |           |             |            |            |            |             |                                                  |            |            |  |  |
| 83408     | Gimap3    | GTPase, IMAP family member 3                                              | 1             |           |             |            |            |            |             |                                                  |            |            |  |  |
| 16205     | Gimap1    | GTPase, IMAP family member 1                                              | 1             |           |             |            |            |            |             |                                                  |            |            |  |  |
| 74105     | Gga2      | golgi associated, gamma adaptin ear containing, ARF binding protein 2     | 1             |           |             |            |            |            |             |                                                  |            |            |  |  |
| 233552    | Gdpd5     | glycerophosphodiester phosphodiesterase domain containing 5               | 1             |           |             |            |            |            |             |                                                  |            |            |  |  |
| 229900    | Gbp7      | guanylate binding protein 7                                               | 1             |           |             |            |            |            |             |                                                  |            |            |  |  |
| 55932     | Gbp3      | guanylate binding protein 3                                               | 1             |           |             |            |            |            |             |                                                  |            |            |  |  |
| 74185     | Gbe1      | glucan (1,4-alpha-), branching enzyme 1                                   | 1             |           |             |            |            |            |             |                                                  |            |            |  |  |

| Gene ID | Symbol   | Description                                                                           | DEG/Set count | 2mWT_2mKO | 20mWT_20mKO | 2mKO_20mKO | 2mWT_20mWT | 2mWT_30mWT | 20mWT_30mWT | Literature-Mining (Aging-Cholesterol literature) |            |            |
|---------|----------|---------------------------------------------------------------------------------------|---------------|-----------|-------------|------------|------------|------------|-------------|--------------------------------------------------|------------|------------|
|         |          |                                                                                       |               | 9         | 230         | 406        | 48         | 1904       | 1157        | #Paper                                           | Enrichment | BH P-value |
| 384281  | Gatc     | glutamyl-tRNA(Gln) amidotransferase, subunit C homolog (bacterial)                    | 1             |           |             |            |            | -1.20      |             |                                                  |            |            |
| 14456   | Gas6     | growth arrest specific 6                                                              | 1             |           |             |            |            | -1.39      |             |                                                  |            |            |
| 14451   | Gas1     | growth arrest specific 1                                                              | 1             |           |             |            |            | -1.73      |             |                                                  |            |            |
| 207839  | Galnt6   | UDP-N-acetyl-alpha-D-galactosamine:polypeptide N-acetylgalactosaminyltransferase 6    | 1             |           |             |            |            | 2.63       |             |                                                  |            |            |
| 171212  | Galnt10  | UDP-N-acetyl-alpha-D-galactosamine:polypeptide N-acetylgalactosaminyltransferase 10   | 1             |           |             |            |            | -1.52      |             |                                                  |            |            |
| 14420   | Galc     | galactosylceramidase                                                                  | 1             |           |             |            |            | 1.59       |             |                                                  |            |            |
| 231580  | Gak      | cyclin G associated kinase                                                            | 1             |           |             |            |            | 1.28       |             |                                                  |            |            |
| 14405   | Gabrg1   | gamma-aminobutyric acid (GABA) A receptor, subunit gamma 1                            | 1             |           | -2.75       |            |            |            |             |                                                  |            |            |
| 14086   | Fscn1    | fascin homolog 1, actin bundling protein (Strongylocentrotus purpuratus)              | 1             |           |             |            |            | -1.44      |             |                                                  |            |            |
| 68655   | Fndc1    | fibronectin type III domain containing 1                                              | 1             |           |             |            |            | -1.53      |             |                                                  |            |            |
| 14263   | Fmo5     | flavin containing monooxygenase 5                                                     | 1             |           |             |            |            | -1.42      |             |                                                  |            |            |
| 71409   | Fmn12    | formin-like 2                                                                         | 1             |           |             |            |            | -1.16      |             |                                                  |            |            |
| 14255   | Fit3     | FMS-like tyrosine kinase 3                                                            | 1             |           | -1.67       |            |            |            |             |                                                  |            |            |
| 286940  | Flnb     | filamin, beta                                                                         | 1             |           |             |            |            | -1.31      |             |                                                  |            |            |
| 14231   | Fkbp7    | FK506 binding protein 7                                                               | 1             |           |             |            |            | -1.25      |             |                                                  |            |            |
| 14229   | Fkbp5    | FK506 binding protein 5                                                               | 1             |           |             |            |            | 1.61       |             |                                                  |            |            |
| 231997  | Fkbp14   | FK506 binding protein 14                                                              | 1             |           |             |            |            | -1.23      |             |                                                  |            |            |
| 60344   | Fign     | fidgetin                                                                              | 1             |           |             |            |            | 1.42       |             |                                                  |            |            |
| 58249   | Fibp     | fibroblast growth factor (acidic) intracellular binding protein                       | 1             |           |             |            |            | -1.28      |             |                                                  |            |            |
| 67529   | Fgfr1op2 | FGFR1 oncogene partner 2                                                              | 1             |           |             |            |            | 1.48       |             |                                                  |            |            |
| 14172   | Fgf18    | fibroblast growth factor 18                                                           | 1             |           | -2.22       |            |            |            |             |                                                  |            |            |
| 59083   | Fetub    | fetuin beta                                                                           | 1             |           | 2.90        |            |            |            |             |                                                  |            |            |
| 207278  | Fchsd2   | FCH and double SH3 domains 2                                                          | 1             |           |             |            |            | 1.74       |             |                                                  |            |            |
| 215384  | Fcgbp    | Fc fragment of IgG binding protein                                                    | 1             |           |             |            |            | -2.06      |             |                                                  |            |            |
| 14127   | Fcer1g   | Fc receptor, IgE, high affinity I, gamma polypeptide                                  | 1             |           | 1.38        |            |            |            |             |                                                  |            |            |
| 50753   | Fbxo8    | F-box protein 8                                                                       | 1             |           |             |            |            | 1.85       |             |                                                  |            |            |
| 69754   | Fbxo7    | F-box protein 7                                                                       | 1             |           |             |            |            | 1.23       |             |                                                  |            |            |
| 66822   | Fbxo25   | F-box protein 25                                                                      | 1             |           |             |            |            | -1.40      |             |                                                  |            |            |
| 101358  | Fbxl14   | F-box and leucine-rich repeat protein 14                                              | 1             |           |             |            |            | 1.28       |             |                                                  |            |            |
| 14114   | Fbln1    | fibulin 1                                                                             | 1             |           |             |            |            | -1.64      |             |                                                  |            |            |
| 14089   | Fap      | fibroblast activation protein                                                         | 1             |           |             |            |            | -1.70      |             |                                                  |            |            |
| 237211  | Fancb    | Fanconi anemia, complementation group B                                               | 1             |           |             |            |            | -1.53      |             |                                                  |            |            |
| 385658  | Fam55c   | family with sequence similarity 55, member C                                          | 1             |           | -1.56       |            |            |            |             |                                                  |            |            |
| 66294   | Fam3a    | family with sequence similarity 3, member A                                           | 1             |           |             |            |            | -1.26      |             |                                                  |            |            |
| 381217  | Fam189a2 | family with sequence similarity 189, member A2                                        | 1             |           |             |            |            | -1.43      |             |                                                  |            |            |
| 70638   | Fam189a1 | family with sequence similarity 189, member A1                                        | 1             |           |             |            |            | -1.64      |             |                                                  |            |            |
| 381337  | Fam178b  | family with sequence similarity 178, member B                                         | 1             |           |             |            |            | -1.27      |             |                                                  |            |            |
| 226151  | Fam178a  | family with sequence similarity 178, member A                                         | 1             |           |             |            |            | 1.49       |             |                                                  |            |            |
| 68675   | Fam172a  | family with sequence similarity 172, member A                                         | 1             |           |             |            |            | 1.57       |             |                                                  |            |            |
| 74349   | Fam160a2 | family with sequence similarity 160, member A2                                        | 1             |           |             |            |            | -1.30      |             |                                                  |            |            |
| 230579  | Fam151a  | family with sequence similarity 151, member A                                         | 1             |           |             |            |            | -1.37      |             |                                                  |            |            |
| 227298  | Fam134a  | family with sequence similarity 134, member A                                         | 1             |           |             |            |            | -1.18      |             |                                                  |            |            |
| 218236  | Fam120a  | family with sequence similarity 120, member A                                         | 1             |           |             |            |            | 1.22       |             |                                                  |            |            |
| 72750   | Fam117b  | family with sequence similarity 117, member B                                         | 1             |           |             |            |            | 1.36       |             |                                                  |            |            |
| 68303   | Fam114a1 | family with sequence similarity 114, member A1                                        | 1             |           |             |            |            | -1.31      |             |                                                  |            |            |
| 268709  | Fam107a  | family with sequence similarity 107, member A                                         | 1             |           |             |            |            | -1.50      |             |                                                  |            |            |
| 14038   | Expi     | extracellular proteinase inhibitor                                                    | 1             |           | 3.12        |            |            |            |             |                                                  |            |            |
| 211446  | Exoc3    | exocyst complex component 3                                                           | 1             |           |             |            |            | -1.24      |             |                                                  |            |            |
| 14011   | Etv6     | ets variant gene 6 (TEL oncogene)                                                     | 1             |           |             |            |            | 1.45       |             |                                                  |            |            |
| 23943   | Esy1     | extended synaptotagmin-like protein 1                                                 | 1             |           |             |            |            | 1.35       |             |                                                  |            |            |
| 207920  | Esrp1    | epithelial splicing regulatory protein 1                                              | 1             |           |             |            |            | -2.52      |             |                                                  |            |            |
| 67397   | Erp29    | endoplasmic reticulum protein 29                                                      | 1             |           |             |            |            | 1.40       |             |                                                  |            |            |
| 66366   | Ergic3   | ERGIC and golgi 3                                                                     | 1             |           |             |            |            | -1.19      |             |                                                  |            |            |
| 22592   | Ercc5    | excision repair cross-complementing rodent repair deficiency, complementation group 5 | 1             |           |             |            |            | -1.21      |             |                                                  |            |            |
| 111173  | Erc1     | ELKS/RAB6-interacting/CAST family member 1                                            | 1             |           |             |            |            | -1.28      |             |                                                  |            |            |
| 59079   | Erb2ip   | Erb2 interacting protein                                                              | 1             |           |             |            |            | 1.48       |             |                                                  |            |            |
| 13516   | Epyc     | epiphycan                                                                             | 1             |           | 1.84        |            |            |            |             |                                                  |            |            |
| 13848   | Ephb6    | Eph receptor B6                                                                       | 1             |           |             |            |            | -1.46      |             |                                                  |            |            |
| 270190  | Ephb1    | Eph receptor B1                                                                       | 1             |           | 1.50        |            |            |            |             |                                                  |            |            |
| 18606   | Enpp2    | ectonucleotide pyrophosphatase/phosphodiesterase 2                                    | 1             |           |             |            |            | -1.33      |             |                                                  |            |            |
| 67870   | Enoph1   | enolase-phosphatase 1                                                                 | 1             |           |             |            |            | -1.22      |             |                                                  |            |            |
| 54325   | Elovl1   | elongation of very long chain fatty acids (FEN1/Elo2, SUR4/Elo3, yeast)-like 1        | 1             |           |             |            |            | -1.17      |             |                                                  |            |            |
| 192170  | Eif4a3   | eukaryotic translation initiation factor 4A3                                          | 1             |           | 1.21        |            |            |            |             |                                                  |            |            |
| 54709   | Eif3i    | eukaryotic translation initiation factor 3, subunit I                                 | 1             |           |             |            |            | 1.17       |             |                                                  |            |            |
| 55944   | Eif3d    | eukaryotic translation initiation factor 3, subunit D                                 | 1             |           |             |            |            | 1.42       |             |                                                  |            |            |
| 66235   | Eif1ax   | eukaryotic translation initiation factor 1A, X-linked                                 | 1             |           |             |            |            | 1.32       |             |                                                  |            |            |
| 98878   | Ehd4     | EH-domain containing 4                                                                | 1             |           |             |            |            | 1.19       |             |                                                  |            |            |
| 259300  | Ehd2     | EH-domain containing 2                                                                | 1             |           |             |            |            | -1.34      |             |                                                  |            |            |
| 112405  | Egln1    | EGL nine homolog 1 (C. elegans)                                                       | 1             |           |             |            |            | -1.30      |             |                                                  |            |            |
| 353156  | Egfl7    | EGF-like domain 7                                                                     | 1             |           |             |            |            | -1.50      |             |                                                  |            |            |
| 71877   | Efhc1    | EF-hand domain (C-terminal) containing 1                                              | 1             |           |             |            |            | -1.44      |             |                                                  |            |            |



| Gene ID   | Symbol        | Description                                                                         | DEG/Set count | 2mWT_2mKO | 20mWT_20mKO | 2mKO_20mKO | 2mWT_20mWT | 2mWT_30mWT | 20mWT_30mWT | Literature-Mining (Aging-Cholesterol literature) |            |            |  |  |
|-----------|---------------|-------------------------------------------------------------------------------------|---------------|-----------|-------------|------------|------------|------------|-------------|--------------------------------------------------|------------|------------|--|--|
|           |               |                                                                                     |               | 9         | 230         | 406        | 48         | 1904       | 1157        | #Paper                                           | Enrichment | BH P-value |  |  |
| 216238    | Eea1          | early endosome antigen 1                                                            | 1             |           |             |            |            |            |             |                                                  |            |            |  |  |
| 107522    | Ece2          | endothelin converting enzyme 2                                                      | 1             |           |             |            |            |            |             |                                                  |            |            |  |  |
| 55960     | Ebag9         | estrogen receptor-binding fragment-associated gene 9                                | 1             |           |             |            |            |            |             |                                                  |            |            |  |  |
| 223593    | E430025E21Rik | RIKEN cDNA E430025E21 gene                                                          | 1             |           |             |            |            |            |             |                                                  |            |            |  |  |
| 66573     | Dzip1         | DAZ interacting protein 1                                                           | 1             |           |             |            |            |            |             |                                                  |            |            |  |  |
| 80915     | Dusp12        | dual specificity phosphatase 12                                                     | 1             |           |             |            |            |            |             |                                                  |            |            |  |  |
| 209200    | Dtx3l         | deltex 3-like (Drosophila)                                                          | 1             |           |             |            |            |            |             |                                                  |            |            |  |  |
| 434423    | Dppa5a        | developmental pluripotency associated 5A                                            | 1             |           |             |            |            |            |             |                                                  |            |            |  |  |
| 13482     | Dpp4          | dipeptidylpeptidase 4                                                               | 1             |           |             |            |            |            |             |                                                  |            |            |  |  |
| 238130    | Dock4         | dedicator of cytokinesis 4                                                          | 1             |           |             |            |            |            |             |                                                  |            |            |  |  |
| 13421     | Dnase1l3      | deoxyribonuclease 1-like 3                                                          | 1             |           | -1.71       |            |            |            |             |                                                  |            |            |  |  |
| 13002     | Dnajc5        | DnaJ (Hsp40) homolog, subfamily C, member 5                                         | 1             |           |             |            |            |            |             |                                                  |            |            |  |  |
| 69408     | Dnajc17       | DnaJ (Hsp40) homolog, subfamily C, member 17                                        | 1             |           |             |            |            |            |             |                                                  |            |            |  |  |
| 30045     | Dnajc12       | DnaJ (Hsp40) homolog, subfamily C, member 12                                        | 1             |           |             |            |            |            |             |                                                  |            |            |  |  |
| 106794    | Dhx57         | DEAH (Asp-Glu-Ala-Asp/His) box polypeptide 57                                       | 1             |           |             |            |            |            |             |                                                  |            |            |  |  |
| 20148     | Dhrs3         | dehydrogenase/reductase (SDR family) member 3                                       | 1             |           |             |            |            |            |             |                                                  |            |            |  |  |
| 52585     | Dhrs1         | dehydrogenase/reductase (SDR family) member 1                                       | 1             |           |             |            |            |            |             |                                                  |            |            |  |  |
| 116891    | Derl2         | Der1-like domain family, member 2                                                   | 1             |           |             |            |            |            |             |                                                  |            |            |  |  |
| 232449    | Dera          | 2-deoxyribose-5-phosphate aldolase homolog (C. elegans)                             | 1             |           | 1.44        |            |            |            |             |                                                  |            |            |  |  |
| 211896    | Depdc7        | DEP domain containing 7                                                             | 1             |           |             |            |            |            |             |                                                  |            |            |  |  |
| 54006     | Deaf1         | deformed epidermal autoregulatory factor 1 (Drosophila)                             | 1             |           |             |            |            |            |             |                                                  |            |            |  |  |
| 53817     | Ddx39b        | DEAD (Asp-Glu-Ala-Asp) box polypeptide 39B                                          | 1             |           |             |            |            |            |             |                                                  |            |            |  |  |
| 56200     | Ddx21         | DEAD (Asp-Glu-Ala-Asp) box polypeptide 21                                           | 1             |           |             |            |            |            |             |                                                  |            |            |  |  |
| 67040     | Ddx17         | DEAD (Asp-Glu-Ala-Asp) box polypeptide 17                                           | 1             |           |             |            |            |            |             |                                                  |            |            |  |  |
| 114874    | Ddhd1         | DDHD domain containing 1                                                            | 1             |           |             |            |            |            |             |                                                  |            |            |  |  |
| 69305     | Dcps          | decapping enzyme, scavenger                                                         | 1             |           |             |            |            |            |             |                                                  |            |            |  |  |
| 73379     | Dcbl2         | discoidin, CUB and LCCL domain containing 2                                         | 1             |           |             |            |            |            |             |                                                  |            |            |  |  |
| 226414    | Dars          | aspartyl-tRNA synthetase                                                            | 1             |           |             |            |            |            |             |                                                  |            |            |  |  |
| 57373     | D930014E17Rik | RIKEN cDNA D930014E17 gene                                                          | 1             |           |             |            |            |            |             |                                                  |            |            |  |  |
| 654810    | D630032N06Rik | RIKEN cDNA D630032N06 gene                                                          | 1             |           |             |            |            |            |             |                                                  |            |            |  |  |
| 52392     | D1Ert622e     | DNA segment, Chr 1, ERATO Doi 622, expressed                                        | 1             |           |             |            |            |            |             |                                                  |            |            |  |  |
| 52318     | D1Ert448e     | DNA segment, Chr 1, ERATO Doi 448, expressed                                        | 1             |           |             |            |            |            |             |                                                  |            |            |  |  |
| 27762     | D17H6S56E-3   | DNA segment, Chr 17, human D6S56E 3                                                 | 1             |           | -2.33       |            |            |            |             |                                                  |            |            |  |  |
| 100504016 | D130020L05Rik | NA                                                                                  | 1             |           |             |            |            |            |             |                                                  |            |            |  |  |
| 27528     | D0H4S114      | DNA segment, human D4S114                                                           | 1             |           |             |            |            |            |             |                                                  |            |            |  |  |
| 225995    | D030056L22Rik | RIKEN cDNA D030056L22 gene                                                          | 1             |           |             |            |            |            |             |                                                  |            |            |  |  |
| 13113     | Cyp3a13       | cytochrome P450, family 3, subfamily a, polypeptide 13                              | 1             |           | 1.69        |            |            |            |             |                                                  |            |            |  |  |
| 13107     | Cyp2f2        | cytochrome P450, family 2, subfamily f, polypeptide 2                               | 1             |           | -6.13       |            |            |            |             |                                                  |            |            |  |  |
| 56448     | Cyp2d22       | cytochrome P450, family 2, subfamily d, polypeptide 22                              | 1             |           |             |            |            |            |             |                                                  |            |            |  |  |
| 66427     | Cyb5b         | cytochrome b5 type B                                                                | 1             |           |             |            |            |            |             |                                                  |            |            |  |  |
| 319478    | Cxxc4         | CXXC finger 4                                                                       | 1             |           | -2.14       |            |            |            |             |                                                  |            |            |  |  |
| 12778     | Cxcr7         | chemokine (C-X-C motif) receptor 7                                                  | 1             |           |             |            |            |            |             |                                                  |            |            |  |  |
| 80744     | Cwc22         | CWC22 spliceosome-associated protein homolog (S. cerevisiae)                        | 1             |           |             |            |            |            |             |                                                  |            |            |  |  |
| 66070     | Cwc15         | CWC15 homolog (S. cerevisiae)                                                       | 1             |           |             |            |            |            |             |                                                  |            |            |  |  |
| 13043     | Cttn          | cortactin                                                                           | 1             |           |             |            |            |            |             |                                                  |            |            |  |  |
| 13039     | Ctsl          | cathepsin L                                                                         | 1             |           |             |            |            |            |             |                                                  |            |            |  |  |
| 13032     | Ctsc          | cathepsin C                                                                         | 1             |           |             |            |            |            |             |                                                  |            |            |  |  |
| 12385     | Ctnna1        | catenin (cadherin associated protein), alpha 1                                      | 1             |           |             |            |            |            |             |                                                  |            |            |  |  |
| 269037    | Ctif          | CBP80/20-dependent translation initiation factor                                    | 1             |           | -1.42       |            |            |            |             |                                                  |            |            |  |  |
| 227292    | Ctdsp1        | CTD (carboxy-terminal domain, RNA polymerase II, polypeptide A) small phosphatase 1 | 1             |           |             |            |            |            |             |                                                  |            |            |  |  |
| 217615    | Clage5        | CTAGE family, member 5                                                              | 1             |           | 1.24        |            |            |            |             |                                                  |            |            |  |  |
| 83691     | Crispld1      | cysteine-rich secretory protein LCCL domain containing 1                            | 1             |           |             |            |            |            |             |                                                  |            |            |  |  |
| 208677    | Creb3l3       | cAMP responsive element binding protein 3-like 3                                    | 1             |           |             |            |            |            |             |                                                  |            |            |  |  |
| 12873     | Cpa3          | carboxypeptidase A3, mast cell                                                      | 1             |           | 2.24        |            |            |            |             |                                                  |            |            |  |  |
| 20463     | Cox7a2l       | cytochrome c oxidase subunit VIIa polypeptide 2-like                                | 1             |           |             |            |            |            |             |                                                  |            |            |  |  |
| 12864     | Cox6c         | cytochrome c oxidase, subunit VIc                                                   | 1             |           |             |            |            |            |             |                                                  |            |            |  |  |
| 12721     | Coro1a        | coronin, actin binding protein 1A                                                   | 1             |           |             |            |            |            |             |                                                  |            |            |  |  |
| 53419     | Corin         | corin                                                                               | 1             |           |             |            |            |            |             |                                                  |            |            |  |  |
| 56358     | Copz2         | coatamer protein complex, subunit zeta 2                                            | 1             |           |             |            |            |            |             |                                                  |            |            |  |  |
| 66200     | Commf6        | COMM domain containing 6                                                            | 1             |           |             |            |            |            |             |                                                  |            |            |  |  |
| 66398     | Commf5        | COMM domain containing 5                                                            | 1             |           |             |            |            |            |             |                                                  |            |            |  |  |
| 66199     | Commf4        | COMM domain containing 4                                                            | 1             |           |             |            |            |            |             |                                                  |            |            |  |  |
| 69456     | Commf10       | COMM domain containing 10                                                           | 1             |           |             |            |            |            |             |                                                  |            |            |  |  |
| 17846     | Commf1        | COMM domain containing 1                                                            | 1             |           |             |            |            |            |             |                                                  |            |            |  |  |
| 12841     | Col9a3        | collagen, type IX, alpha 3                                                          | 1             |           | 1.63        |            |            |            |             |                                                  |            |            |  |  |
| 12833     | Col6a1        | collagen, type VI, alpha 1                                                          | 1             |           |             |            |            |            |             |                                                  |            |            |  |  |
| 53867     | Col5a3        | collagen, type V, alpha 3                                                           | 1             |           |             |            |            |            |             |                                                  |            |            |  |  |

| Gene ID | Symbol     | Description                                                                               | DEG/Set count | 2mWT_2mKO | 20mWT_20mKO | 2mKO_20mKO | 2mWT_20mWT | 2mWT_30mWT | 20mWT_30mWT | Literature-Mining (Aging-Cholesterol literature) |            |            |
|---------|------------|-------------------------------------------------------------------------------------------|---------------|-----------|-------------|------------|------------|------------|-------------|--------------------------------------------------|------------|------------|
|         |            |                                                                                           |               | 9         | 230         | 406        | 48         | 1904       | 1157        | #Paper                                           | Enrichment | BH P-value |
| 12826   | Col4a1     | collagen, type IV, alpha 1                                                                | 1             |           |             |            |            | -1.33      |             |                                                  |            |            |
| 12819   | Col15a1    | collagen, type XV, alpha 1                                                                | 1             |           |             |            |            | -1.28      |             |                                                  |            |            |
| 12810   | Coch       | coagulation factor C homolog (Limulus polyphemus)                                         | 1             |           |             |            |            | 1.86       |             |                                                  |            |            |
| 12801   | Cnr1       | cannabinoid receptor 1 (brain)                                                            | 1             |           | -1.71       |            |            |            |             |                                                  |            |            |
| 104625  | Cnot6      | CCR4-NOT transcription complex, subunit 6                                                 | 1             |           |             |            |            | 1.60       |             |                                                  |            |            |
| 94218   | Cnm3       | cyclin M3                                                                                 | 1             |           |             |            |            | -1.33      |             |                                                  |            |            |
| 83674   | Cnm1       | cyclin M1                                                                                 | 1             |           | -2.11       |            |            |            |             |                                                  |            |            |
| 71994   | Cnn3       | calponin 3, acidic                                                                        | 1             |           |             |            |            | -1.20      |             |                                                  |            |            |
| 98417   | Cnih4      | cornichon homolog 4 (Drosophila)                                                          | 1             |           |             |            |            | -1.35      |             |                                                  |            |            |
| 67213   | Cmtm6      | CKLF-like MARVEL transmembrane domain containing 6                                        | 1             |           |             |            |            | -1.48      |             |                                                  |            |            |
| 69574   | Cmb1       | carboxymethylenebutenolidase-like (Pseudomonas)                                           | 1             |           |             |            |            | -1.19      |             |                                                  |            |            |
| 17228   | Cma1       | chymase 1, mast cell                                                                      | 1             |           | 2.27        |            |            |            |             |                                                  |            |            |
| 74325   | Cltb       | clathrin, light polypeptide (Lcb)                                                         | 1             |           |             |            |            | -1.31      |             |                                                  |            |            |
| 12757   | Clta       | clathrin, light polypeptide (Lca)                                                         | 1             |           |             |            |            | 1.20       |             |                                                  |            |            |
| 76524   | Cln6       | ceroid-lipofuscinosis, neuronal 6                                                         | 1             |           |             |            |            | 1.21       |             |                                                  |            |            |
| 78785   | Clip4      | CAP-GLY domain containing linker protein family, member 4                                 | 1             |           | -1.33       |            |            |            |             |                                                  |            |            |
| 29876   | Clic4      | chloride intracellular channel 4 (mitochondrial)                                          | 1             |           |             |            |            | 1.31       |             |                                                  |            |            |
| 69454   | Clic3      | chloride intracellular channel 3                                                          | 1             |           |             |            |            | -1.43      |             |                                                  |            |            |
| 114584  | Clic1      | chloride intracellular channel 1                                                          | 1             |           |             |            |            | 1.57       |             |                                                  |            |            |
| 69810   | Clec4b1    | C-type lectin domain family 4, member b1                                                  | 1             |           |             |            |            | -1.91      |             |                                                  |            |            |
| 665180  | Clec2l     | C-type lectin domain family, member L                                                     | 1             |           | -1.95       |            |            |            |             |                                                  |            |            |
| 56173   | Cldn14     | claudin 14                                                                                | 1             |           |             |            |            | -1.86      |             |                                                  |            |            |
| 18417   | Cldn11     | claudin 11                                                                                | 1             |           |             |            |            | 2.12       |             |                                                  |            |            |
| 58187   | Cldn10     | claudin 10                                                                                | 1             |           |             |            |            | -2.19      |             |                                                  |            |            |
| 12728   | Clcn5      | chloride channel 5                                                                        | 1             |           |             |            |            | -1.64      |             |                                                  |            |            |
| 12716   | Ckmt1      | creatine kinase, mitochondrial 1, ubiquitous                                              | 1             |           | -2.28       |            |            |            |             |                                                  |            |            |
| 67006   | Cisd2      | CDGSH iron sulfur domain 2                                                                | 1             |           |             |            |            | 1.20       |             |                                                  |            |            |
| 100910  | Chpf2      | chondroitin polymerizing factor 2                                                         | 1             |           |             |            |            | 1.80       |             |                                                  |            |            |
| 246048  | Chodl      | chondrolectin                                                                             | 1             |           | -2.65       |            |            |            |             |                                                  |            |            |
| 12662   | Chm        | choroideremia                                                                             | 1             |           |             |            |            | 1.28       |             |                                                  |            |            |
| 218865  | Chdh       | choline dehydrogenase                                                                     | 1             |           |             |            |            | -1.41      |             |                                                  |            |            |
| 269610  | Chd5       | chromodomain helicase DNA binding protein 5                                               | 1             |           |             |            |            | 1.83       |             |                                                  |            |            |
| 214685  | Chadl      | chondroadherin-like                                                                       | 1             |           |             |            |            | -1.55      |             |                                                  |            |            |
| 12633   | Cflar      | CASP8 and FADD-like apoptosis regulator                                                   | 1             |           |             |            |            | 1.35       |             |                                                  |            |            |
| 234673  | Ces2e      | carboxylesterase 2E                                                                       | 1             |           |             |            |            | -1.57      |             |                                                  |            |            |
| 223753  | Cerk       | ceramide kinase                                                                           | 1             |           |             |            |            | 1.49       |             |                                                  |            |            |
| 99151   | Cercam     | cerebral endothelial cell adhesion molecule                                               | 1             |           |             |            |            | -1.58      |             |                                                  |            |            |
| 12609   | Cebpd      | CCAAT/enhancer binding protein (C/EBP), delta                                             | 1             |           |             |            |            | 1.38       |             |                                                  |            |            |
| 52626   | Cdkn2aipnl | CDKN2A interacting protein N-terminal like                                                | 1             |           |             |            |            | 1.67       |             |                                                  |            |            |
| 237459  | Cdk17      | cyclin-dependent kinase 17                                                                | 1             |           |             |            |            | 1.83       |             |                                                  |            |            |
| 12560   | Cdh3       | cadherin 3                                                                                | 1             |           |             |            |            | -1.50      |             |                                                  |            |            |
| 214498  | Cdc73      | cell division cycle 73, Paf1/RNA polymerase II complex component, homolog (S. cerevisiae) | 1             |           |             |            |            | 1.51       |             |                                                  |            |            |
| 56699   | Cdc42ep4   | CDC42 effector protein (Rho GTPase binding) 4                                             | 1             |           |             |            |            | -1.24      |             |                                                  |            |            |
| 12517   | Cd72       | CD72 antigen                                                                              | 1             |           |             |            |            | 2.70       |             |                                                  |            |            |
| 12500   | Cd3d       | CD3 antigen, delta polypeptide                                                            | 1             |           |             |            |            | 6.90       |             |                                                  |            |            |
| 235505  | Cd109      | CD109 antigen                                                                             | 1             |           |             |            |            | 1.39       |             |                                                  |            |            |
| 12469   | Cct8       | chaperonin containing Tcp1, subunit 8 (theta)                                             | 1             |           |             |            |            | 1.21       |             |                                                  |            |            |
| 12462   | Cct3       | chaperonin containing Tcp1, subunit 3 (gamma)                                             | 1             |           |             |            |            | 1.24       |             |                                                  |            |            |
| 227210  | Ccny1      | cyclin Y-like 1                                                                           | 1             |           |             |            |            | -1.18      |             |                                                  |            |            |
| 17151   | Ccndbp1    | cyclin D-type binding-protein 1                                                           | 1             |           |             |            |            | 1.89       |             |                                                  |            |            |
| 12425   | Cckar      | cholecystokinin A receptor                                                                | 1             |           | -2.95       |            |            |            |             |                                                  |            |            |
| 67200   | Ccdc77     | coiled-coil domain containing 77                                                          | 1             |           |             |            |            | -1.40      |             |                                                  |            |            |
| 208908  | Ccdc62     | coiled-coil domain containing 62                                                          | 1             |           |             |            |            | -1.63      |             |                                                  |            |            |
| 232933  | Ccdc61     | coiled-coil domain containing 61                                                          | 1             |           |             |            |            | -1.50      |             |                                                  |            |            |
| 52469   | Ccdc56     | coiled-coil domain containing 56                                                          | 1             |           |             |            |            | 1.32       |             |                                                  |            |            |
| 76380   | Ccdc46     | coiled-coil domain containing 46                                                          | 1             |           |             |            |            | -1.48      |             |                                                  |            |            |
| 52715   | Ccdc43     | coiled-coil domain containing 43                                                          | 1             |           |             |            |            | 1.39       |             |                                                  |            |            |
| 108811  | Ccdc122    | coiled-coil domain containing 122                                                         | 1             |           |             |            |            | 1.39       |             |                                                  |            |            |
| 66815   | Ccdc109b   | coiled-coil domain containing 109B                                                        | 1             |           |             |            |            | 1.30       |             |                                                  |            |            |
| 232821  | Ccdc106    | coiled-coil domain containing 106                                                         | 1             |           |             |            |            | -1.26      |             |                                                  |            |            |
| 12416   | Cbx2       | chromobox homolog 2 (Drosophila Pc class)                                                 | 1             |           |             |            |            | -1.38      |             |                                                  |            |            |
| 12390   | Cav2       | caveolin 2                                                                                | 1             |           |             |            |            | -1.37      |             |                                                  |            |            |
| 12364   | Casp12     | caspase 12                                                                                | 1             |           |             |            |            | 1.61       |             |                                                  |            |            |
| 107239  | Carns1     | carnosine synthase 1                                                                      | 1             |           |             |            |            | -1.63      |             |                                                  |            |            |
| 105844  | Card10     | caspase recruitment domain family, member 10                                              | 1             |           |             |            |            | -1.54      |             |                                                  |            |            |
| 12351   | Car4       | carbonic anhydrase 4                                                                      | 1             |           |             |            |            | -1.85      |             |                                                  |            |            |
| 71934   | Car13      | carbonic anhydrase 13                                                                     | 1             |           | 1.51        |            |            |            |             |                                                  |            |            |
| 12343   | Capza2     | capping protein (actin filament) muscle Z-line, alpha 2                                   | 1             |           |             |            |            | 1.26       |             |                                                  |            |            |
| 12338   | Capn6      | calpain 6                                                                                 | 1             |           |             |            |            | -1.68      |             |                                                  |            |            |
| 12332   | Capg       | capping protein (actin filament), gelsolin-like                                           | 1             |           |             |            |            | 1.15       |             |                                                  |            |            |
| 12331   | Cap1       | CAP, adenylate cyclase-associated protein 1 (yeast)                                       | 1             |           |             |            |            | 1.55       |             |                                                  |            |            |
| 12796   | Camp       | cathelicidin antimicrobial peptide                                                        | 1             |           |             |            |            | -2.03      |             |                                                  |            |            |
| 67488   | Calcoco1   | calcium binding and coiled coil domain 1                                                  | 1             |           |             |            |            | -1.29      |             |                                                  |            |            |
| 12308   | Calb2      | calbindin 2                                                                               | 1             |           |             |            |            | -2.32      |             |                                                  |            |            |
| 320405  | Cadps2     | Ca2+-dependent activator protein for secretion 2                                          | 1             |           | -1.80       |            |            |            |             |                                                  |            |            |
| 12289   | Cacna1d    | calcium channel, voltage-dependent, L type, alpha 1D subunit                              | 1             |           |             |            |            | -1.43      |             |                                                  |            |            |

| Gene ID | Symbol        | Description                                                                          | DEG/Set count | 2mWT_2mKO | 20mWT_20mKO | 2mKO_20mKO | 2mWT_20mWT | 2mWT_30mWT | 20mWT_30mWT | Literature-Mining (Aging-Cholesterol literature) |            |            |
|---------|---------------|--------------------------------------------------------------------------------------|---------------|-----------|-------------|------------|------------|------------|-------------|--------------------------------------------------|------------|------------|
|         |               |                                                                                      |               | 9         | 230         | 406        | 48         | 1904       | 1157        | #Paper                                           | Enrichment | BH P-value |
| 320508  | Cachd1        | cache domain containing 1                                                            | 1             |           |             |            |            |            |             |                                                  |            |            |
| 12283   | Cab39         | calcium binding protein 39                                                           | 1             |           | 1.54        |            |            | 1.25       |             |                                                  |            |            |
| 320295  | C920006O11Rik | RIKEN cDNA C920006O11 gene                                                           | 1             |           |             |            |            | -1.43      |             |                                                  |            |            |
| 97402   | C86187        | expressed sequence C86187                                                            | 1             |           |             |            |            | -1.56      |             |                                                  |            |            |
| 12274   | C6            | complement component 6                                                               | 1             |           |             |            |            | 2.19       |             |                                                  |            |            |
| 77644   | C330007P06Rik | RIKEN cDNA C330007P06 gene                                                           | 1             |           |             |            |            | 1.39       |             |                                                  |            |            |
| 101744  | C330005M16Rik | RIKEN cDNA C330005M16 gene                                                           | 1             |           |             |            |            | -1.43      |             |                                                  |            |            |
| 101831  | C230052I12Rik | RIKEN cDNA C230052I12 gene                                                           | 1             |           |             |            |            | 1.50       |             |                                                  |            |            |
| 320842  | C230035I16Rik | RIKEN cDNA C230035I16 gene                                                           | 1             |           |             |            |            | -1.34      |             |                                                  |            |            |
| 12263   | C2            | complement component 2 (within H-2S)                                                 | 1             |           |             |            |            | -1.56      |             |                                                  |            |            |
| 69183   | C1qtnf2       | C1q and tumor necrosis factor related protein 2                                      | 1             |           |             |            |            | -1.74      |             |                                                  |            |            |
| 12261   | C1qbp         | complement component 1, q subcomponent binding protein                               | 1             |           |             |            |            | 1.20       |             |                                                  |            |            |
| 109284  | C030046I01Rik | RIKEN cDNA C030046I01 gene                                                           | 1             |           |             |            |            | 1.69       |             |                                                  |            |            |
| 12215   | Bsg           | basigin                                                                              | 1             |           |             |            |            | 1.31       |             |                                                  |            |            |
| 114642  | Brdt          | bromodomain, testis-specific                                                         | 1             |           |             |            |            | -1.35      |             |                                                  |            |            |
| 109880  | Braf          | Braf transforming gene                                                               | 1             |           |             |            |            | 1.24       |             |                                                  |            |            |
| 228802  | Bpifb5        | BPI fold containing family B, member 5                                               | 1             |           |             |            |            | -1.38      |             |                                                  |            |            |
| 66162   | Bola2         | bolA-like 2 (E. coli)                                                                | 1             |           |             |            |            | 1.21       |             |                                                  |            |            |
| 51800   | Bok           | BCL2-related ovarian killer protein                                                  | 1             |           |             |            |            | -1.51      |             |                                                  |            |            |
| 224630  | Bnip1         | BCL2/adenovirus E1B interacting protein 1                                            | 1             |           |             |            |            | 1.59       |             |                                                  |            |            |
| 12162   | Bmp7          | bone morphogenetic protein 7                                                         | 1             |           |             |            |            | -1.58      |             |                                                  |            |            |
| 12159   | Bmp4          | bone morphogenetic protein 4                                                         | 1             |           |             |            |            | -1.83      |             |                                                  |            |            |
| 12151   | Bmi1          | Bmi1 polycomb ring finger oncogene                                                   | 1             |           |             |            |            | 1.23       |             |                                                  |            |            |
| 233016  | Blvrb         | biliverdin reductase B (flavin reductase (NADPH))                                    | 1             |           |             |            |            | 1.41       |             |                                                  |            |            |
| 30948   | Bin1          | bridging integrator 1                                                                | 1             |           |             |            |            | 1.99       |             |                                                  |            |            |
| 24115   | Best1         | bestrophin 1                                                                         | 1             |           |             |            |            | -1.37      |             |                                                  |            |            |
| 66165   | Bccip         | BRCA2 and CDKN1A interacting protein                                                 | 1             |           |             |            |            | 1.37       |             |                                                  |            |            |
| 12035   | Bcat1         | branched chain aminotransferase 1, cytosolic                                         | 1             |           | -2.10       |            |            |            |             |                                                  |            |            |
| 216292  | BC067068      | cDNA sequence BC067068                                                               | 1             |           |             |            |            | -1.39      |             |                                                  |            |            |
| 414077  | BC056474      | cDNA sequence BC056474                                                               | 1             |           |             |            |            | 1.12       |             |                                                  |            |            |
| 408058  | BC048507      | cDNA sequence BC048507                                                               | 1             |           |             |            |            | -1.67      |             |                                                  |            |            |
| 270802  | BC048403      | cDNA sequence BC048403                                                               | 1             |           |             |            |            | 1.29       |             |                                                  |            |            |
| 192976  | BC046404      | cDNA sequence BC046404                                                               | 1             |           |             |            |            | -1.32      |             |                                                  |            |            |
| 226527  | BC026585      | cDNA sequence BC026585                                                               | 1             |           |             |            |            | -1.38      |             |                                                  |            |            |
| 216152  | BC005764      | cDNA sequence BC005764                                                               | 1             |           |             |            |            | 1.37       |             |                                                  |            |            |
| 23825   | Banf1         | barrier to autointegration factor 1                                                  | 1             |           |             |            |            | 1.37       |             |                                                  |            |            |
| 228536  | Bahd1         | bromo adjacent homology domain containing 1                                          | 1             |           |             |            |            | 1.40       |             |                                                  |            |            |
| 56336   | B4galt5       | UDP-Gal:betaGlcNAc beta 1,4-galactosyltransferase, polypeptide 5                     | 1             |           |             |            |            | 1.61       |             |                                                  |            |            |
| 26877   | B3galt1       | UDP-Gal:betaGlcNAc beta 1,3-galactosyltransferase, polypeptide 1                     | 1             |           | -1.94       |            |            |            |             |                                                  |            |            |
| 319527  | B230325K18Rik | RIKEN cDNA B230325K18 gene                                                           | 1             |           |             |            |            | -1.43      |             |                                                  |            |            |
| 54375   | Azin1         | antizyme inhibitor 1                                                                 | 1             |           |             |            |            | 1.53       |             |                                                  |            |            |
| 26362   | Axl           | AXL receptor tyrosine kinase                                                         | 1             |           |             |            |            | 1.53       |             |                                                  |            |            |
| 11966   | Atp6v1b2      | ATPase, H+ transporting, lysosomal V1 subunit B2                                     | 1             |           |             |            |            | 1.56       |             |                                                  |            |            |
| 11964   | Atp6v1a       | ATPase, H+ transporting, lysosomal V1 subunit A                                      | 1             |           |             |            |            | 1.61       |             |                                                  |            |            |
| 242341  | Atp6v0d2      | ATPase, H+ transporting, lysosomal V0 subunit D2                                     | 1             |           | 3.66        |            |            |            |             |                                                  |            |            |
| 114143  | Atp6v0b       | ATPase, H+ transporting, lysosomal V0 subunit B                                      | 1             |           |             |            |            | 1.22       |             |                                                  |            |            |
| 67972   | Atp2b1        | ATPase, Ca++ transporting, plasma membrane 1                                         | 1             |           |             |            |            | 1.36       |             |                                                  |            |            |
| 11793   | Atg5          | autophagy-related 5 (yeast)                                                          | 1             |           |             |            |            | 1.31       |             |                                                  |            |            |
| 54343   | Atf7ip        | activating transcription factor 7 interacting protein                                | 1             |           | 1.43        |            |            |            |             |                                                  |            |            |
| 66695   | Aspn          | asporin                                                                              | 1             |           |             |            |            | -2.52      |             |                                                  |            |            |
| 11484   | Aspa          | aspartoacylase                                                                       | 1             |           |             |            |            | 1.38       |             |                                                  |            |            |
| 56495   | Asna1         | arsA arsenite transporter, ATP-binding, homolog 1 (bacterial)                        | 1             |           |             |            |            | 1.48       |             |                                                  |            |            |
| 11890   | Asgr2         | asialoglycoprotein receptor 2                                                        | 1             |           |             |            |            | -1.82      |             |                                                  |            |            |
| 230837  | Asap3         | ArfGAP with SH3 domain, ankyrin repeat and PH domain 3                               | 1             |           |             |            |            | -1.55      |             |                                                  |            |            |
| 76219   | Arxes1        | adipocyte-related X-chromosome expressed sequence 1                                  | 1             |           |             |            |            | -1.97      |             |                                                  |            |            |
| 11877   | Arvcf         | armadillo repeat gene deleted in velo-cardio-facial syndrome                         | 1             |           |             |            |            | -1.33      |             |                                                  |            |            |
| 11881   | Arsb          | arylsulfatase B                                                                      | 1             |           |             |            |            | 1.22       |             |                                                  |            |            |
| 56378   | Arpc3         | actin related protein 2/3 complex, subunit 3                                         | 1             |           |             |            |            | 1.29       |             |                                                  |            |            |
| 56443   | Arpc1a        | actin related protein 2/3 complex, subunit 1A                                        | 1             |           |             |            |            | 1.38       |             |                                                  |            |            |
| 494468  | Armcx5        | armadillo repeat containing, X-linked 5                                              | 1             |           |             |            |            | 1.54       |             |                                                  |            |            |
| 80981   | Arl4d         | ADP-ribosylation factor-like 4D                                                      | 1             |           |             |            |            | -1.80      |             |                                                  |            |            |
| 68146   | Arl13b        | ADP-ribosylation factor-like 13B                                                     | 1             |           |             |            |            | 1.52       |             |                                                  |            |            |
| 23806   | Arih1         | ariadne ubiquitin-conjugating enzyme E2 binding protein homolog 1 (Drosophila)       | 1             |           |             |            |            | 1.26       |             |                                                  |            |            |
| 58996   | Arhgap23      | Rho GTPase activating protein 23                                                     | 1             |           |             |            |            | -1.23      |             |                                                  |            |            |
| 73910   | Arhgap18      | Rho GTPase activating protein 18                                                     | 1             |           |             |            |            | -1.36      |             |                                                  |            |            |
| 99371   | Arfgef2       | ADP-ribosylation factor guanine nucleotide-exchange factor 2 (brefeldin A-inhibited) | 1             |           |             |            |            | 1.28       |             |                                                  |            |            |
| 11843   | Arf4          | ADP-ribosylation factor 4                                                            | 1             |           |             |            |            | 1.51       |             |                                                  |            |            |
| 11840   | Arf1          | ADP-ribosylation factor 1                                                            | 1             |           |             |            |            | 1.89       |             |                                                  |            |            |

| Gene ID   | Symbol        | Description                                                                                    | DEG/Set count | 2mWT_2mKO | 20mWT_20mKO | 2mKO_20mKO | 2mWT_20mWT | 2mWT_30mWT | 20mWT_30mWT | Literature-Mining (Aging-Cholesterol literature) |            |            |
|-----------|---------------|------------------------------------------------------------------------------------------------|---------------|-----------|-------------|------------|------------|------------|-------------|--------------------------------------------------|------------|------------|
|           |               |                                                                                                |               | 9         | 230         | 406        | 48         | 1904       | 1157        | #Paper                                           | Enrichment | BH P-value |
| 212285    | Arap2         | ArfGAP with RhoGAP domain, ankyrin repeat and PH domain 2                                      | 1             |           |             |            |            | 1.53       |             |                                                  |            |            |
| 11821     | Aprt          | adenine phosphoribosyl transferase                                                             | 1             |           |             |            |            | 1.27       |             |                                                  |            |            |
| 11425     | Apoc4         | apolipoprotein C-IV                                                                            | 1             |           |             |            |            | 3.76       |             |                                                  |            |            |
| 23796     | Aplnr         | apelin receptor                                                                                | 1             |           |             |            |            | -2.66      |             |                                                  |            |            |
| 71770     | Ap2b1         | adaptor-related protein complex 2, beta 1 subunit                                              | 1             |           |             |            |            | 1.26       |             |                                                  |            |            |
| 11769     | Ap1s1         | adaptor protein complex AP-1, sigma 1                                                          | 1             |           |             |            |            | 1.33       |             |                                                  |            |            |
| 71872     | Aox4          | aldehyde oxidase 4                                                                             | 1             |           | -3.20       |            |            |            |             |                                                  |            |            |
| 11752     | Anxa8         | annexin A8                                                                                     | 1             |           |             |            |            | -2.00      |             |                                                  |            |            |
| 11747     | Anxa5         | annexin A5                                                                                     | 1             |           |             |            |            | 1.36       |             |                                                  |            |            |
| 225187    | Ankrd29       | ankyrin repeat domain 29                                                                       | 1             |           | -1.92       |            |            |            |             |                                                  |            |            |
| 232339    | Ankrd26       | ankyrin repeat domain 26                                                                       | 1             |           |             |            |            | -1.38      |             |                                                  |            |            |
| 72713     | Angptl1       | angiotensin-like 1                                                                             | 1             |           |             |            |            | -2.10      |             |                                                  |            |            |
| 66156     | Anapc11       | anaphase promoting complex subunit 11                                                          | 1             |           |             |            |            | -1.23      |             |                                                  |            |            |
| 11717     | Ampd3         | adenosine monophosphate deaminase 3                                                            | 1             |           |             |            |            | 1.29       |             |                                                  |            |            |
| 72041     | Alkbh4        | alkB, alkylation repair homolog 4 (E. coli)                                                    | 1             |           |             |            |            | 1.31       |             |                                                  |            |            |
| 56752     | Aldh9a1       | aldehyde dehydrogenase 9, subfamily A1                                                         | 1             |           |             |            |            | -1.34      |             |                                                  |            |            |
| 621603    | Aldh3b2       | aldehyde dehydrogenase 3 family, member B2                                                     | 1             |           | 4.41        |            |            |            |             |                                                  |            |            |
| 11997     | Akr1b7        | aldo-keto reductase family 1, member B7                                                        | 1             |           |             |            |            | -1.85      |             |                                                  |            |            |
| 11641     | Akap2         | A kinase (PRKA) anchor protein 2                                                               | 1             |           |             |            |            | 1.32       |             |                                                  |            |            |
| 100041194 | Ahnak2        | AHNAK nucleoprotein 2                                                                          | 1             |           |             |            |            | 1.44       |             |                                                  |            |            |
| 66395     | Ahnak         | AHNAK nucleoprotein (desmoyokin)                                                               | 1             |           | 1.22        |            |            |            |             |                                                  |            |            |
| 52906     | Ahi1          | Abelson helper integration site 1                                                              | 1             |           |             |            |            | -1.26      |             |                                                  |            |            |
| 230793    | Ahdc1         | AT hook, DNA binding motif, containing 1                                                       | 1             |           |             |            |            | -1.48      |             |                                                  |            |            |
| 28169     | Agpat3        | 1-acylglycerol-3-phosphate O-acyltransferase 3                                                 | 1             |           |             |            |            | -1.23      |             |                                                  |            |            |
| 216549    | Aftph         | atfiphiin                                                                                      | 1             |           |             |            |            | 1.19       |             |                                                  |            |            |
| 11529     | Adh7          | alcohol dehydrogenase 7 (class IV), mu or sigma polypeptide                                    | 1             |           |             |            |            | -1.54      |             |                                                  |            |            |
| 69117     | Adh6a         | alcohol dehydrogenase 6A (class V)                                                             | 1             |           |             |            |            | -2.13      |             |                                                  |            |            |
| 11532     | Adh5          | alcohol dehydrogenase 5 (class III), chi polypeptide                                           | 1             |           | 1.10        |            |            |            |             |                                                  |            |            |
| 11514     | Adcy8         | adenylate cyclase 8                                                                            | 1             |           |             |            |            | -1.53      |             |                                                  |            |            |
| 268822    | Adck5         | aarF domain containing kinase 5                                                                | 1             |           |             |            |            | -1.38      |             |                                                  |            |            |
| 231821    | Adap1         | ArfGAP with dual PH domains 1                                                                  | 1             |           |             |            |            | -1.61      |             |                                                  |            |            |
| 216725    | Adamts2       | a disintegrin-like and metalloproteinase (reprolysin type) with thrombospondin type 1 motif, 2 | 1             |           |             |            |            | -1.77      |             |                                                  |            |            |
| 11499     | Adam5         | a disintegrin and metalloproteinase domain 5                                                   | 1             |           |             |            |            | -1.55      |             |                                                  |            |            |
| 11496     | Adam22        | a disintegrin and metalloproteinase domain 22                                                  | 1             |           | -1.62       |            |            |            |             |                                                  |            |            |
| 11488     | Adam11        | a disintegrin and metalloproteinase domain 11                                                  | 1             |           |             |            |            | 2.19       |             |                                                  |            |            |
| 66204     | Acyp1         | acylphosphatase 1, erythrocyte (common) type                                                   | 1             |           |             |            |            | 1.47       |             |                                                  |            |            |
| 71670     | Acy3          | aspartoacylase (aminoacylase) 3                                                                | 1             |           |             |            |            | -1.74      |             |                                                  |            |            |
| 74117     | Actr3         | ARP3 actin-related protein 3 homolog (yeast)                                                   | 1             |           |             |            |            | 1.38       |             |                                                  |            |            |
| 11468     | Actg2         | actin, gamma 2, smooth muscle, enteric                                                         | 1             |           |             |            |            | 2.92       |             |                                                  |            |            |
| 11595     | Acan          | aggrecan                                                                                       | 1             |           |             |            |            | -1.59      |             |                                                  |            |            |
| 113868    | Acaa1a        | acetyl-Coenzyme A acyltransferase 1A                                                           | 1             |           |             |            |            | -1.32      |             |                                                  |            |            |
| 320712    | Abi3bp        | ABI gene family, member 3 (NESH) binding protein                                               | 1             |           |             |            |            | -1.49      |             |                                                  |            |            |
| 19299     | Abcd3         | ATP-binding cassette, sub-family D (ALD), member 3                                             | 1             |           |             |            |            | -1.12      |             |                                                  |            |            |
| 239273    | Abcc4         | ATP-binding cassette, sub-family C (CFTR/MRP), member 4                                        | 1             |           |             |            |            | 1.39       |             |                                                  |            |            |
| 18669     | Abcb1b        | ATP-binding cassette, sub-family B (MDR/TAP), member 1B                                        | 1             |           |             |            |            | 1.87       |             |                                                  |            |            |
| 27404     | Abca8b        | ATP-binding cassette, sub-family A (ABC1), member 8b                                           | 1             |           | 1.77        |            |            |            |             |                                                  |            |            |
| 76184     | Abca6         | ATP-binding cassette, sub-family A (ABC1), member 6                                            | 1             |           | 1.90        |            |            |            |             |                                                  |            |            |
| 30956     | Aass          | aminoacidopate-semialdehyde synthase                                                           | 1             |           |             |            |            | -1.90      |             |                                                  |            |            |
| 239435    | Aard          | alanine and arginine rich domain containing protein                                            | 1             |           | -1.88       |            |            |            |             |                                                  |            |            |
| 68074     | A930013F10Rik | RIKEN cDNA A930013F10 gene                                                                     | 1             |           |             |            |            | -1.47      |             |                                                  |            |            |
| 100503044 | A730020M07Rik | RIKEN cDNA A730020M07 gene                                                                     | 1             |           |             |            |            | -1.85      |             |                                                  |            |            |
| 269855    | A430110N23Rik | RIKEN cDNA A430110N23 gene                                                                     | 1             |           |             |            |            | -1.67      |             |                                                  |            |            |
| 380977    | A330009N23Rik | RIKEN cDNA A330009N23 gene                                                                     | 1             |           |             |            |            | -1.51      |             |                                                  |            |            |
| 223267    | A21d1         | AI2-like domain 1                                                                              | 1             |           |             |            |            | 1.54       |             |                                                  |            |            |
| 319469    | A230056J06Rik | RIKEN cDNA A230056J06 gene                                                                     | 1             |           |             |            |            | -2.84      |             |                                                  |            |            |
| 212448    | 9330159F19Rik | RIKEN cDNA 9330159F19 gene                                                                     | 1             | 1.49      |             |            |            |            |             |                                                  |            |            |
| 229550    | 9130204L05Rik | RIKEN cDNA 9130204L05 gene                                                                     | 1             |           | -2.65       |            |            |            |             |                                                  |            |            |
| 100043133 | 9130023H24Rik | RIKEN cDNA 9130023H24 gene                                                                     | 1             |           |             |            |            | 1.38       |             |                                                  |            |            |
| 229613    | 6330549D23Rik | RIKEN cDNA 6330549D23 gene                                                                     | 1             |           |             |            |            | -1.80      |             |                                                  |            |            |
| 70717     | 6330406I15Rik | RIKEN cDNA 6330406I15 gene                                                                     | 1             |           |             |            |            | -1.49      |             |                                                  |            |            |
| 109198    | 6030407O03Rik | RIKEN cDNA 6030407O03 gene                                                                     | 1             |           |             |            |            | -3.06      |             |                                                  |            |            |
| 70617     | 5730508B09Rik | RIKEN cDNA 5730508B09 gene                                                                     | 1             |           |             |            |            | 1.32       |             |                                                  |            |            |
| 66648     | 5730494M16Rik | RIKEN cDNA 5730494M16 gene                                                                     | 1             |           | -1.91       |            |            |            |             |                                                  |            |            |
| 329735    | 4933431E20Rik | RIKEN cDNA 4933431E20 gene                                                                     | 1             |           |             |            |            | -1.52      |             |                                                  |            |            |
| 71101     | 4933407H18Rik | RIKEN cDNA 4933407H18 gene                                                                     | 1             |           |             |            |            | -1.30      |             |                                                  |            |            |
| 229227    | 4932438A13Rik | RIKEN cDNA 4932438A13 gene                                                                     | 1             |           |             |            | 1.54       |            |             |                                                  |            |            |
| 69034     | 4930579G22Rik | RIKEN cDNA 4930579G22 gene                                                                     | 1             |           |             |            |            | -1.35      |             |                                                  |            |            |
| 75269     | 4930564D02Rik | RIKEN cDNA 4930564D02 gene                                                                     | 1             |           |             |            |            | -1.44      |             |                                                  |            |            |
| 75180     | 4930538K18Rik | RIKEN cDNA 4930538K18 gene                                                                     | 1             |           |             |            |            | -1.79      |             |                                                  |            |            |
| 320163    | 4930525G20Rik | RIKEN cDNA 4930525G20 gene                                                                     | 1             |           |             |            |            | -2.25      |             |                                                  |            |            |
| 78185     | 4930524L23Rik | RIKEN cDNA 4930524L23 gene                                                                     | 1             |           |             |            |            | -1.70      |             |                                                  |            |            |

| Gene ID   | Symbol        | Description                                | DEG/Set count | 2mWT_2mKO | 20mWT_20mKO | 2mKO_20mKO | 2mWT_20mWT | 2mWT_30mWT | 20mWT_30mWT | Literature-Mining (Aging-Cholesterol literature) |            |            |
|-----------|---------------|--------------------------------------------|---------------|-----------|-------------|------------|------------|------------|-------------|--------------------------------------------------|------------|------------|
|           |               |                                            |               | 9         | 230         | 406        | 48         | 1904       | 1157        | #Paper                                           | Enrichment | BH P-value |
| 74704     | 493051815Rik  | RIKEN cDNA 493051815 gene                  | 1             |           |             |            |            |            |             |                                                  |            |            |
| 71653     | 4930506M07Rik | RIKEN cDNA 4930506M07 gene                 | 1             |           |             |            |            |            |             |                                                  |            |            |
| 66730     | 4921531C22Rik | RIKEN cDNA 4921531C22 gene                 | 1             |           |             |            |            |            |             |                                                  |            |            |
| 97820     | 4833439L19Rik | RIKEN cDNA 4833439L19 gene                 | 1             |           |             |            |            |            |             |                                                  |            |            |
| 74597     | 4833418N02Rik | RIKEN cDNA 4833418N02 gene                 | 1             |           |             |            |            |            |             |                                                  |            |            |
| 320869    | 4732415M23Rik | RIKEN cDNA 4732415M23 gene                 | 1             |           |             |            |            |            |             |                                                  |            |            |
| 100040322 | 3830408C21Rik | RIKEN cDNA 3830408C21 gene                 | 1             |           |             |            |            |            |             |                                                  |            |            |
| 67290     | 3110040N11Rik | RIKEN cDNA 3110040N11 gene                 | 1             |           |             |            |            |            |             |                                                  |            |            |
| 67289     | 3110021A11Rik | RIKEN cDNA 3110021A11 gene                 | 1             |           |             |            |            |            |             |                                                  |            |            |
| 100502745 | 2900009J06Rik | RIKEN cDNA 2900009J06 gene                 | 1             |           |             |            |            |            |             |                                                  |            |            |
| 70419     | 2810408A11Rik | RIKEN cDNA 2810408A11 gene                 | 1             |           |             |            |            |            |             |                                                  |            |            |
| 69953     | 2810025M15Rik | RIKEN cDNA 2810025M15 gene                 | 1             |           |             |            |            |            |             |                                                  |            |            |
| 100503178 | 2810013P06Rik | RIKEN cDNA 2810013P06 gene                 | 1             |           |             |            |            |            |             |                                                  |            |            |
| 72146     | 2810001A02Rik | RIKEN cDNA 2810001A02 gene                 | 1             |           |             |            |            |            |             |                                                  |            |            |
| 72658     | 2700097O09Rik | RIKEN cDNA 2700097O09 gene                 | 1             |           |             |            |            |            |             |                                                  |            |            |
| 72657     | 2700094K13Rik | RIKEN cDNA 2700094K13 gene                 | 1             |           |             |            |            |            |             |                                                  |            |            |
| 72203     | 2610507I01Rik | RIKEN cDNA 2610507I01 gene                 | 1             |           |             |            |            |            |             |                                                  |            |            |
| 72128     | 2610008E11Rik | RIKEN cDNA 2610008E11 gene                 | 1             |           |             |            |            |            |             |                                                  |            |            |
| 67513     | 2610002J02Rik | RIKEN cDNA 2610002J02 gene                 | 1             |           |             |            |            |            |             |                                                  |            |            |
| 66520     | 2610001J05Rik | RIKEN cDNA 2610001J05 gene                 | 1             |           |             |            |            |            |             |                                                  |            |            |
| 76799     | 2510006D16Rik | RIKEN cDNA 2510006D16 gene                 | 1             |           |             |            |            |            |             |                                                  |            |            |
| 71970     | 2410018M08Rik | RIKEN cDNA 2410018M08 gene                 | 1             |           |             |            |            |            |             |                                                  |            |            |
| 69221     | 2410006H16Rik | RIKEN cDNA 2410006H16 gene                 | 1             |           |             |            |            |            |             |                                                  |            |            |
| 217732    | 2310044G17Rik | RIKEN cDNA 2310044G17 gene                 | 1             |           |             |            |            |            |             |                                                  |            |            |
| 69573     | 2310016C08Rik | hypoxia inducible lipid droplet associated | 1             |           |             |            |            |            |             |                                                  |            |            |
| 69548     | 2310015A10Rik | RIKEN cDNA 2310015A10 gene                 | 1             |           |             |            |            |            |             |                                                  |            |            |
| 71885     | 2310003H01Rik | RIKEN cDNA 2310003H01 gene                 | 1             |           |             |            |            |            |             |                                                  |            |            |
| 70134     | 2210011C24Rik | RIKEN cDNA 2210011C24 gene                 | 1             |           |             |            |            |            |             |                                                  |            |            |
| 70261     | 2010110P09Rik | RIKEN cDNA 2010110P09 gene                 | 1             |           |             |            |            |            |             |                                                  |            |            |
| 67892     | 1810063B05Rik | RIKEN cDNA 1810063B05 gene                 | 1             |           |             |            |            |            |             |                                                  |            |            |
| 75602     | 1810062O18Rik | RIKEN cDNA 1810062O18 gene                 | 1             |           |             |            |            |            |             |                                                  |            |            |
| 66291     | 1810030N24Rik | RIKEN cDNA 1810030N24 gene                 | 1             |           |             |            |            |            |             |                                                  |            |            |
| 73467     | 1700066M21Rik | RIKEN cDNA 1700066M21 gene                 | 1             |           |             |            |            |            |             |                                                  |            |            |
| 66337     | 1700025K23Rik | RIKEN cDNA 1700025K23 gene                 | 1             |           |             |            |            |            |             |                                                  |            |            |
| 66602     | 1700020I14Rik | RIKEN cDNA 1700020I14 gene                 | 1             |           |             |            |            |            |             |                                                  |            |            |
| 69351     | 1700008A04Rik | RIKEN cDNA 1700008A04 gene                 | 1             |           |             |            |            |            |             |                                                  |            |            |
| 665268    | 1600029O15Rik | ribosomal protein L17 pseudogene           | 1             |           |             |            |            |            |             |                                                  |            |            |
| 68075     | 1520402A15Rik | RIKEN cDNA 1520402A15 gene                 | 1             |           |             |            |            |            |             |                                                  |            |            |
| 78896     | 1500015O10Rik | RIKEN cDNA 1500015O10 gene                 | 1             |           |             |            |            |            |             |                                                  |            |            |
| 223776    | 1300018J18Rik | RIKEN cDNA 1300018J18 gene                 | 1             |           |             |            |            |            |             |                                                  |            |            |
| 74152     | 1300002K09Rik | RIKEN cDNA 1300002K09 gene                 | 1             |           |             |            |            |            |             |                                                  |            |            |
| 66214     | 1190002H23Rik | RIKEN cDNA 1190002H23 gene                 | 1             |           |             |            |            |            |             |                                                  |            |            |
| 68497     | 1110018G07Rik | RIKEN cDNA 1110018G07 gene                 | 1             |           |             |            |            |            |             |                                                  |            |            |
| 56372     | 1110004F10Rik | RIKEN cDNA 1110004F10 gene                 | 1             |           |             |            |            |            |             |                                                  |            |            |
| 68550     | 1110002N22Rik | RIKEN cDNA 1110002N22 gene                 | 1             |           |             |            |            |            |             |                                                  |            |            |
| 68554     | 1110001A16Rik | RIKEN cDNA 1110001A16 gene                 | 1             |           |             |            |            |            |             |                                                  |            |            |
| 66096     | 0910001L09Rik | RIKEN cDNA 0910001L09 gene                 | 1             |           |             |            |            |            |             |                                                  |            |            |
| 66086     | 0610037P05Rik | RIKEN cDNA 0610037P05 gene                 | 1             |           |             |            |            |            |             |                                                  |            |            |
| 78687     | 0610025J13Rik | RIKEN cDNA 0610025J13 gene                 | 1             |           |             |            |            |            |             |                                                  |            |            |
| 57438     | March7        | membrane-associated ring finger (C3HC4) 7  | 1             |           |             |            |            |            |             |                                                  |            |            |
| 100503583 |               | fibrinogen silencer-binding protein        | 1             |           |             |            |            |            |             |                                                  |            |            |
| 100504348 |               | NA                                         | 1             |           |             |            |            |            |             |                                                  |            |            |
